# Supplementary material for: Access to 1,2-diketones by an unusual radical cascade
Source: Royal Society of Chemistry journal article supplement (doi:10.1039/c0cc04725b), 2011-01-01

# Supporting Information

## Access to 1,2-diketones by an unusual radical cascade

Rama Heng\* and Samir Z. Zard\*

*Laboratoire de Synthèse Organique, CNRS UMR 7652, Département de Chimie, Ecole  
Polytechnique,  
91128 Palaiseau, France*

\* [heng@dco.polytechnique.fr](mailto:heng@dco.polytechnique.fr) ; [zard@poly.polytechnique.fr](mailto:zard@poly.polytechnique.fr)

### Contents:

|                                                                                   |           |
|-----------------------------------------------------------------------------------|-----------|
| <b>General Experimental Methods .....</b>                                         | <b>2</b>  |
| <b>I. Experimental procedures and spectroscopic data.....</b>                     | <b>3</b>  |
| <i>General procedure A : 1,4 addition of organocuprate .....</i>                  | <i>3</i>  |
| <i>Modified general procedure A : 1,4 addition of organocuprate.....</i>          | <i>3</i>  |
| <i>General procedure B : the cleavage of the silyl ether and alkylation .....</i> | <i>3</i>  |
| <i>General procedure C : addition of the ethyl vinyl ether .....</i>              | <i>11</i> |
| <i>General procedure D : formation of the xanthate .....</i>                      | <i>11</i> |
| <i>General procedure E: radical fragmentation of the cyclohexane. ....</i>        | <i>19</i> |
| <b>II. Copies of <sup>1</sup>H and <sup>13</sup>C NMR Spectra .....</b>           | <b>25</b> |

## General Experimental Methods

Anhydrous diethyl ether was obtained by distillation from sodium-benzophenone under nitrogen. Other solvents were used as supplied by commercial sources. Petroleum ether refers to the fraction of light petroleum ether, boiling between 40-60°C. All reagents were used as supplied by commercial sources unless otherwise stated. Purification procedures were in accordance with the instructions in D. D. Perrin and W. L. F. Armarego, "Purification of Laboratory Chemicals", Fourth Edition, The Bath Press, Bath, 2002. All reactions were carried out under dry, oxygen free nitrogen. Flash chromatography was performed on silica gel (SDS, 60 Å C. C. 40-63 µm) as the stationary phase. Thin Layer chromatography (TLC) was performed on alumina plates pre-coated with silica gel (Merck silica gel, 60 F254), which

were visualized by the quenching of UV fluorescence ( $\lambda_{\text{max}} = 254 \text{ nm}$ ) and/or by staining with vanillin in acidic ethanol followed by heating. Infrared spectra were recorded as solutions in  $\text{CCl}_4$  using  $\text{CaF}_2$  cells, on a Perkin-Elmer FT 1600. Absorption maxima ( $\nu_{\text{max}}$ ) are reported in wavenumbers ( $\text{cm}^{-1}$ ) and only selected peaks are reported. Magnetic resonance spectra were recorded at ambient temperature on either a Bruker AMX 400, or a Bruker Avance DPX 400 instruments. Proton magnetic resonance spectra ( $^1\text{H}$  NMR) were recorded at 400 MHz and coupling constants ( $J$ ) are reported to  $\pm 0.5 \text{ Hz}$ . Carbon magnetic resonance spectra ( $^{13}\text{C}$  NMR) were recorded at 100.6 MHz. Chemical shifts ( $\delta_{\text{H}}$ ,  $\delta_{\text{C}}$ ) are quoted in parts per million (ppm) and are referenced to the residual solvent peak. Low-resolution mass spectra ( $m/z$ ) were recorded by chemical ionization (CI) on a Hewlett-Packard HP 5989B and only report molecular species ( $(\text{MH})^+$ ,  $(\text{MNH}_4)^+$ ) and other major fragments. High-resolution mass spectra were recorded by positive electron impact ionization ( $\text{EI}^+$ ) at 70 eV on a JEOL JMS-GCmate II mass spectrometer. The quoted masses are accurate to  $\pm 5 \text{ ppm}$ .

## I. Experimental procedures and spectroscopic data

### *General procedure A : 1,4 addition of organocuprate*

To a solution of **CuBr.Me<sub>2</sub>S** (0.1n mmol) and **HMPA** (2n mmol) in distilled **THF** (1.5n mL) was added dropwise, a solution of **organomagnesium reagent** (2n mmol) under a nitrogen atmosphere at - 40 °C. After 30 min, **2-methyl-2-cyclohexenone** (n mmol) and **TMSCl** (2n mmol) were added. After stirring for 1 h at - 40 °C, **triethylamine** (1.9n mmol) was added, followed by **water** (2n mL). The mixture was extracted 3 times with diethyl ether. The combined organic layers were washed with water, dried and evaporated, giving crude silyl enol ether.

### *Modified general procedure A : 1,4 addition of organocuprate*

To a solution of **CuBr.Me<sub>2</sub>S** (1.6n mmol) in distilled **THF** (3n mL) was added under a nitrogen atmosphere a solution of **organomagnesium reagent** (1.5n mmol) at -100 °C. After 15 min at -100 °C a mixture of **2-methyl-2-cyclohexenone** (n mmol) and **TMSCl** (2n mmol) in **THF** (0.75n mL) was added dropwise in 30 min. After 1.5 h **HMPA** (n mmol) and **triethylamine** (1.9n mmol) were added. **Water** was then added, and the mixture was extracted 3 times with petroleum ether. The combined organic layers were washed with water, dried and evaporate, giving crude silyl enol ether.

### *General procedure B : the cleavage of the silyl ether and alkylation*

To a solution of the above **silyl enol ether** (n mmol) in **THF** (6.5n mL) and cooled at 0 °C was rapidly added a solution of **methyllithium** (1.2n mmol). The resulting solution was stirred for 15 min, then cooled at -78 °C. A solution of **methyl iodide** (5n mmol) in **HMPA** (n mL) was then quickly added. The resulting mixture was allowed to stir with gradual warming to room temperature (about 30 min), and was then diluted with diethyl ether and washed with water and brine. The organic layer was dried, and concentrated, to give crude 2,2-dimethyl-cyclohexanone.

3-Allyl-2,2-dimethyl-cyclohexanone

7a

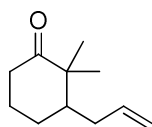

$C_{11}H_{18}O$   
 $M = 166.26 \text{ g}\cdot\text{mol}^{-1}$   
Colorless oil

Reaction: Following modified general procedure A, the reaction was carried out using **2-methyl-2-cyclohexenone** (3.5 g, 31.8 mmol), and **allylmagnesium bromide (1M in THF)**, giving crude silyl enol ether (5.8 g, 26 mmol, 82 %).

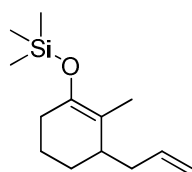

**RMN  $^{13}C$**  ( $\delta$ , ppm) ( $CDCl_3$ , 100.6 MHz):

144.3 (C=COTMS), 137.8 (CH=CH<sub>2</sub>), 115.5 (CH=CH<sub>2</sub>), 114.8 (C=COTMS), 38.6 (CH-C=C), 37.6, 30.4, 27.0, 20.2 (4 x CH<sub>2</sub>), 14.4 (CH<sub>3</sub>C=C), 0.61 (Si(CH<sub>3</sub>)<sub>3</sub>)

The **silyl enol ether** (5.8 g, 26 mmol) was then transformed following general procedure B, giving crude compound **7a**.

Purification: Column chromatography, elution with petroleum ether/ethyl acetate (95/5).

Yield: 55 %

**RMN  $^1H$**  ( $\delta$ , ppm) ( $CDCl_3$ , 400 MHz) 5.70 (dddd, J=5.7 Hz, J=8.5 Hz, J=10.1 Hz, J=16.9 Hz, 1H, CH<sub>2</sub>=CH), 4.95 – 5.2 (m, 2H, CH<sub>2</sub>=CH), 2.46 (ddd, J=6.0 Hz, J=11.7 Hz, J=14.0, 1H, CH<sub>2(ax)</sub>-C=O), 2.32 – 2.32 (m, 2H, CH<sub>2(eq)</sub>-C=O, CH<sub>2</sub>-CH=CH<sub>2</sub>), 1.90 – 1.98 (m, 1H, CH<sub>2</sub>CH<sub>2</sub>CHCH<sub>2</sub>), 1.76 – 1.87 (m, 2H, CH<sub>2</sub>CH<sub>2</sub>CHCH<sub>2</sub>), 1.38 – 1.62 (m, 3H, CH<sub>2</sub>CH<sub>2</sub>CHCH<sub>2</sub>), 1.11 (s, 3H, CH<sub>3</sub>), 1.01 (s, 3H, CH<sub>3</sub>).

**RMN  $^{13}C$**  ( $\delta$ , ppm) ( $CDCl_3$ , 100.6 MHz) 215.7 (C=O), 137.5 (CH=CH<sub>2</sub>), 115.9 (CH=CH<sub>2</sub>), 48.7 (C(CH<sub>3</sub>)<sub>2</sub>), 47.3 (CH-C(Me)<sub>2</sub>), 37.9, 34.4, 25.7, 24.8 (4 x CH<sub>2</sub>), 22.9 (CH<sub>3</sub>), 19.9 (CH<sub>3</sub>).

**IR**  $\nu$  (cm<sup>-1</sup>) ( $CCl_4$ ) 1709 (C=O).

**HRMS** (EI+) calcd for C<sub>11</sub>H<sub>18</sub>O 166.1358, found: 166.1364.



**2,2-Dimethyl-3-(2-methyl-allyl)-cyclohexanone**

**7b**

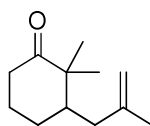

$C_{12}H_{20}O$   
 $M = 180.29 \text{ g}\cdot\text{mol}^{-1}$   
Colorless oil

- Reaction:** Following general procedure A, the reaction was carried out using **2-methyl-2-cyclohexenone** (1.1 mL, 10 mmol), and **methallylmagnesium bromide (0.5M in THF)**, giving crude silyl enol ether. The **silyl enol ether** was then transformed following general procedure B, yielding compound **7b**.
- Purification:** Column chromatography, elution with petroleum ether/diethyl ether (95/5).
- Yield:** 19 %
- RMN  $^1H$  ( $\delta$ , ppm) (CDCl<sub>3</sub>, 400 MHz)** 4.69 (s, 1H, C=CH<sub>2</sub>), 4.61 (s, 1H, C=CH<sub>2</sub>), 2.42 (ddd, J=6.2Hz, J=11.9Hz, J=13.9Hz, 1H, CH<sub>2(ax)</sub>-C=O), 2.23 (dtd, J=1.3Hz, J=4.8Hz, J=13.9Hz, 1H, CH<sub>2(eq)</sub>-C=O), 2.1 (m, 1H, CH<sub>2</sub>-CH<sub>2</sub>-CH-CH<sub>2</sub>), 1.84 – 1.94 (m, 1H, CH<sub>2</sub>-CH<sub>2</sub>-CH-CH<sub>2</sub>), 1.79 (dd, J=11.3Hz, J=13.5Hz, 1H, CH<sub>2</sub>-CH<sub>2</sub>-CH-CH<sub>2</sub>), 1.69 – 1.76 (m, 1H, CH<sub>2</sub>-CH<sub>2</sub>-CH-CH<sub>2</sub>), 1.60 (s, 3H, CH<sub>3</sub>-C=CH<sub>2</sub>), 1.44 – 1.58 (m, 2H, CH<sub>2</sub>-CH<sub>2</sub>-CH-CH<sub>2</sub>), 1.29 – 1.41 (m, 1H, CH<sub>2</sub>-CH<sub>2</sub>-CH-CH<sub>2</sub>), 1.06 (s, 3H, CH<sub>3</sub>), 0.96 (s, 3H, CH<sub>3</sub>).
- RMN  $^{13}C$  ( $\delta$ , ppm) (CDCl<sub>3</sub>, 100.6 MHz)** 215.6 (C=O), 143.6 (C<sub>q</sub>=CH<sub>2</sub>), 112.0 (CH=CH<sub>2</sub>), 48.5 (C(CH<sub>3</sub>)<sub>2</sub>), 44.9 (CH-C<sub>q</sub>(Me)<sub>2</sub>), 38.3, 37.7 (CH<sub>2</sub>CO, CH<sub>2</sub>-C=CH<sub>2</sub>), 25.4, 24.8 (CH<sub>2</sub>-CH<sub>2</sub>-CH), 22.7 (C(CH<sub>3</sub>)<sub>2</sub>), 21.7 (CH<sub>3</sub>C=CH<sub>2</sub>), 19.7 (C(CH<sub>3</sub>)<sub>2</sub>).
- IR  $\nu$  (cm<sup>-1</sup>) (CCl<sub>4</sub>)** 1709 (C=O).
- HRMS (EI+)** calcd for C<sub>12</sub>H<sub>20</sub>O 180.1514, found: 180.1521.

**2,2,3-Trimethyl-cyclohexanone**

**7c**

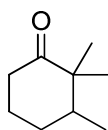

$C_9H_{16}O$   
 $M = 140.22 \text{ g}\cdot\text{mol}^{-1}$   
Colorless oil

Reference: Chapuis, C.; Brauchli, R.; Thommen, W. *Helv. Chim. Acta* **1993**, 76, 535.

Reaction: Following general procedure A, the reaction was carried out using **2-methyl-2-cyclohexenone** (1.1 mL, 10 mmol), and **methylmagnesium bromide (1.4M in THF)**, giving crude silyl enol ether (1.22 g, 6.2 mmol).

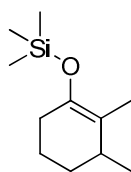

**RMN  $^{13}C$**  ( $\delta$ , ppm) ( $CDCl_3$ , 100.6 MHz):

143.2 (C=COTMS), 116.4 (C=COTMS), 35.6 (CH-C=C), 31.3, 30.5, 20.4 (3 x  $CH_2$ ), 19.9 ( $CH_3CH$ ) 14.2 ( $CH_3C=C$ ), 0.64 ( $Si(CH_3)_3$ )

The **silyl enol ether** (1.22 g, 6.2 mmol) was then transformed following general procedure B, yielding compound **7c**.

Purification: None

Yield: 59 %

Product described in the literature.

### 3-Ethyl-2,2-dimethyl-cyclohexanone

7d

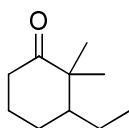

$C_{10}H_{18}O$   
 $M = 154.25 \text{ g}\cdot\text{mol}^{-1}$   
Colorless oil

Reference: Chapuis, C.; Brauchli, R.; Thommen, W. *Helv. Chim. Acta* **1993**, *76*, 535.

Reaction: Following general procedure A, the reaction was carried out using **2-methyl-2-cyclohexenone** (1.1 mL, 10 mmol), and **ethylmagnesium bromide (1M in THF)**, giving crude silyl enol ether.  
The **silyl enol ether** (10 mmol) was then transformed following general procedure B, yielding compound **7d**.

Purification: None

Yield: 75 %

Product described in the literature.

### 3-Isopropyl-2,2-dimethyl-cyclohexanone

7e

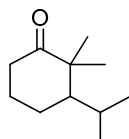

$C_{11}H_{20}O$   
 $M = 168.28 \text{ g}\cdot\text{mol}^{-1}$   
Colorless oil

Reaction: Following general procedure A, the reaction was carried out using **2-methyl-2-cyclohexenone** (1.1 mL, 10 mmol), and **isopropylmagnesium bromide (2M in THF)**, giving crude silyl enol ether.

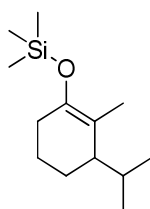

**RMN  $^{13}C$**  ( $\delta$ , ppm) ( $CDCl_3$ , 100.6 MHz):

145.0 (C=COTMS), 114.9 (C=COTMS), 44.4 (CH-C=C), 30.8, 28.3, 21.0 (3 x  $CH_2$ ), 22.3, 22.2 ( $CH(CH_3)_2$ ), 16.1 ( $CH(CH_3)_2$ ), 13.8 ( $CH_3C=C$ ), 0.63 ( $Si(CH_3)_3$ )

The **silyl enol ether** was then transformed following general procedure B, yielding compound **7e**.

|                                                                 |                                                                                                                                                                                                                                                                                                                                                                                                                                                                                                                                                                                          |
|-----------------------------------------------------------------|------------------------------------------------------------------------------------------------------------------------------------------------------------------------------------------------------------------------------------------------------------------------------------------------------------------------------------------------------------------------------------------------------------------------------------------------------------------------------------------------------------------------------------------------------------------------------------------|
| Purification:                                                   | Column chromatography, elution with petroleum ether/ethyl acetate (95/5).                                                                                                                                                                                                                                                                                                                                                                                                                                                                                                                |
| Yield:                                                          | 80 %                                                                                                                                                                                                                                                                                                                                                                                                                                                                                                                                                                                     |
| RMN <sup>1</sup> H (δ, ppm)<br>(CDCl <sub>3</sub> , 400 MHz)    | 2.5 (dt, J=6.3Hz, J=13.4Hz, 1H, CH <sub>2</sub> CO), 2.22 – 2.28 (m, 1H, CH <sub>2</sub> CO), 2.00 – 2.07 (m, 1H, CH <sub>2</sub> -CH <sub>2</sub> ), 1.95 (dtd, J=1.0Hz, J=7.0Hz, J=13.8Hz, 1H, CH <sub>2</sub> -CH <sub>2</sub> ), 1.44 – 1.68 (m, 3H, CH <sub>2</sub> -CH <sub>2</sub> -CH-CH), 1.27 – 1.32 (m, 1H, CH <sub>2</sub> -CH <sub>2</sub> -CH-CH), 1.09 (s, 3H, C(CH <sub>3</sub> ) <sub>2</sub> ), 1.07 (s, 3H, C(CH <sub>3</sub> ) <sub>2</sub> ), 0.92 (d, J=7.0Hz, 3H, CH(CH <sub>3</sub> ) <sub>2</sub> ), 0.89 (d, J=6.9Hz, 3H, CH(CH <sub>3</sub> ) <sub>2</sub> ). |
| RMN <sup>13</sup> C (δ, ppm)<br>(CDCl <sub>3</sub> , 100.6 MHz) | 216.0 (C=O), 52.7 (CHCH(CH <sub>3</sub> ) <sub>2</sub> ), 50.0 (C <sub>q</sub> (Me) <sub>2</sub> ), 38.2 (CH <sub>2</sub> CO), 26.8 (CH(CH <sub>3</sub> ) <sub>2</sub> ), 25.8 (CH <sub>2</sub> -CH <sub>2</sub> ), 24.8 (CH <sub>3</sub> ), 22.7 (CH <sub>3</sub> ), 21.3 (CH <sub>2</sub> -CH <sub>2</sub> ), 20.7 (CH <sub>3</sub> ), 19.1 (CH <sub>3</sub> ).                                                                                                                                                                                                                        |
| IR ν (cm <sup>-1</sup> ) (CCl <sub>4</sub> )                    | 1709 (C=O).                                                                                                                                                                                                                                                                                                                                                                                                                                                                                                                                                                              |
| HRMS (EI+)                                                      | calcd for C <sub>11</sub> H <sub>20</sub> O 168.1514, found: 168.1518.                                                                                                                                                                                                                                                                                                                                                                                                                                                                                                                   |

### 2,2-Dimethyl-3-pentyl-cyclohexanone

7f

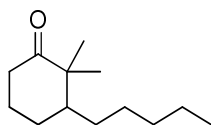

C<sub>13</sub>H<sub>24</sub>O  
M = 196.33 g.mol<sup>-1</sup>  
Colorless oil

|                                                                 |                                                                                                                                                                                                                                                                                                                                                                                                                                                                                                                                                                                                                                                                |
|-----------------------------------------------------------------|----------------------------------------------------------------------------------------------------------------------------------------------------------------------------------------------------------------------------------------------------------------------------------------------------------------------------------------------------------------------------------------------------------------------------------------------------------------------------------------------------------------------------------------------------------------------------------------------------------------------------------------------------------------|
| Reaction:                                                       | Following general procedure A, the reaction was carried out using <b>2-methyl-2-cyclohexenone</b> (1.1 mL, 10 mmol), and <b>pentylmagnesium bromide (2M in THF)</b> , giving crude silyl enol ether.<br>The <b>silyl enol ether</b> was then transformed following general procedure B, yielding compound <b>7f</b> .                                                                                                                                                                                                                                                                                                                                          |
| Purification:                                                   | Column chromatography, elution with petroleum ether/ethyl acetate (95/5).                                                                                                                                                                                                                                                                                                                                                                                                                                                                                                                                                                                      |
| Yield:                                                          | 65 %                                                                                                                                                                                                                                                                                                                                                                                                                                                                                                                                                                                                                                                           |
| RMN <sup>1</sup> H (δ, ppm)<br>(CDCl <sub>3</sub> , 400 MHz)    | 2.49 (ddd, J=6.1Hz, J=12.0Hz, J=13.9Hz, 1H, CH <sub>2</sub> CO), 2.26 – 2.33 (m, 1H, CH <sub>2</sub> CO), 1.93 – 2.02 (m, 1H, CH <sub>2</sub> -CH <sub>2</sub> ), 1.84 – 1.90 (m, 1H, CH <sub>2</sub> -CH <sub>2</sub> ), 1.53 – 1.65 (m, 1H, CH <sub>2</sub> -CH <sub>2</sub> -CH-pentyl), 1.52 – 1.35 (m, 4H, CH <sub>2</sub> -CH <sub>2</sub> -CH-(CH <sub>2</sub> ) <sub>4</sub> ), 1.10 – 1.35 (m, 6H, CH <sub>2</sub> -CH <sub>2</sub> -CH-(CH <sub>2</sub> ) <sub>4</sub> ), 1.10 (s, 3H, C(CH <sub>3</sub> ) <sub>2</sub> ), 1.01 (s, 3H, C(CH <sub>3</sub> ) <sub>2</sub> ), 0.88 (t, J=7.0Hz, 3H, (CH <sub>2</sub> ) <sub>4</sub> CH <sub>3</sub> ). |
| RMN <sup>13</sup> C (δ, ppm)<br>(CDCl <sub>3</sub> , 100.6 MHz) | 216.6 (C=O), 49.0 (C <sub>q</sub> (Me) <sub>2</sub> ), 47.8 (CH-pentyl), 38.0 (CH <sub>2</sub> CO), 32.0, 29.6, 27.9, 26.1, 25.2, 22.6 ((CH <sub>2</sub> ) <sub>2</sub> -CH-(CH <sub>2</sub> ) <sub>4</sub> ), 22.8, (C(CH <sub>3</sub> ) <sub>2</sub> ), 19.9 (C(CH <sub>3</sub> ) <sub>2</sub> ), 14.0 ((CH <sub>2</sub> ) <sub>4</sub> CH <sub>3</sub> ).                                                                                                                                                                                                                                                                                                   |

**IR**  $\nu$  ( $\text{cm}^{-1}$ ) ( $\text{CCl}_4$ ) 1708 (C=O).

**HRMS** (EI+) calcd for  $\text{C}_{13}\text{H}_{24}\text{O}$  196.1827, found: 196.1822.

**3-Cyclopentyl-2,2-dimethyl-cyclohexanone**

**7g**

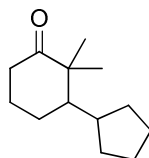

$\text{C}_{13}\text{H}_{22}\text{O}$   
 $M = 194.31 \text{ g}\cdot\text{mol}^{-1}$   
Colorless oil

**Reaction:** Following general procedure A, the reaction was carried out using **2-methyl-2-cyclohexenone** (1.1 mL, 10 mmol), and **cyclopentylmagnesium bromide (2M in THF)**, giving crude silyl enol ether.

The **silyl enol ether** was then transformed following general procedure B, yielding compound **7g**.

**Purification:** Column chromatography, elution with petroleum ether/ethyl acetate (97/3).

**Yield:** 55 %

**RMN  $^1\text{H}$**  ( $\delta$ , ppm) (CDCl<sub>3</sub>, 400 MHz) 2.45 – 2.55 (m, 1H,  $\text{CH}_{2(\text{ax})}\text{-C=O}$ ), 2.23 – 2.32 (m, 1H,  $\text{CH}_{2(\text{eq})}\text{-C=O}$ ), 1.90 – 2.08 (m, 2H), 1.24 – 1.80 (m, 10H), 1.18 – 1.35 (m, 2H) ( $\text{CH}_2\text{CH}_2\text{CHCH}(\text{CH}_2)_4$ ), 1.06 (s, 3H,  $\text{CH}_3$ ), 0.96 (s, 3H,  $\text{CH}_3$ ).

**RMN  $^{13}\text{C}$**  ( $\delta$ , ppm) (CDCl<sub>3</sub>, 100.6 MHz) 216.3 (C=O), 50.9 ( $\text{CHC}_q(\text{Me})_2$ ), 49.9 ( $\text{C}_q(\text{Me})_2$ ), 39.9 ( $\text{CH}(\text{CH}_2)_4$ ), 38.0 ( $\text{CH}_2\text{CO}$ ), 33.7, 29.2, 25.9, 25.6, 24.6, 23.1 ( $\text{CH}_2\text{-CH}_2\text{CH-CH}(\text{CH}_2)_4$ ), 23.3 ( $\text{CH}_3$ ), 21.0 ( $\text{CH}_3$ ).

**IR**  $\nu$  ( $\text{cm}^{-1}$ ) ( $\text{CCl}_4$ ) 1706 (C=O).

**HRMS** (EI+) calcd for  $\text{C}_{13}\text{H}_{22}\text{O}$  194.1671, found: 194.1662.

**3-Cyclopropyl-2,2-dimethyl-cyclohexanone**

**7h**

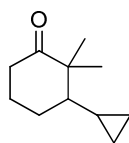

$C_{11}H_{18}O$   
 $M = 166.26 \text{ g}\cdot\text{mol}^{-1}$   
Colorless oil

- Reaction:** Following general procedure A, the reaction was carried out using **2-methyl-2-cyclohexenone** (1.1 mL, 10 mmol), and **cyclopropylmagnesium bromide (0.5M in THF)**, giving crude silyl enol ether.  
The **silyl enol ether** was then transformed following general procedure B, yielding compound **7h**.
- Purification:** Column chromatography, elution with petroleum ether/ethyl acetate (97/3).
- Yield:** 26 %
- RMN  $^1H$**  ( $\delta$ , ppm) (CDCl<sub>3</sub>, 400 MHz) 2.38 (ddd, J=6.0Hz, J=10.7Hz, J=14.0Hz, 1H,  $CH_{2(ax)}-C=O$ ), 2.23 (dtd, J=0.9Hz, J=5.5Hz, J=14.0Hz, 1H,  $CH_{2(eq)}-C=O$ ), 1.87 – 1.96 (m, 1H,  $COCH_2-CH_2-CH_2$ ), 1.73 – 1.82 (m, 1H,  $COCH_2-CH_2-CH_2$ ), 1.48 – 1.70 (m, 2H,  $COCH_2-CH_2-CH_2$ ), 1.12 (s, 3H,  $CH_3$ ), 1.09 (s, 3H,  $CH_3$ ), 0.67 (dt, J=3.8Hz, J=9.5Hz,  $CH(CH_2)_2$ ), 0.46 – 0.62 (m, 2H,  $CH-CH(CH_2)_2$ ), 0.31 – 0.39 (m, 1H,  $CH(CH_2)_2$ ), 0.13 (td, J=4.6Hz, J=9.6Hz, 1H,  $CH(CH_2)_2$ ), -0.10 (td, J=4.9Hz, J=14.8Hz, 1H,  $CH(CH_2)_2$ ).
- RMN  $^{13}C$**  ( $\delta$ , ppm) (CDCl<sub>3</sub>, 100.6 MHz) 216.0 (C=O), 53.1 ( $CHC_q(Me)_2$ ), 49.8 ( $C_q(Me)_2$ ), 37.5 ( $CH_2CO$ ), 27.0, 24.8 ( $COCH_2-CH_2-CH_2$ ), 23.8 ( $CH_3$ ), 20.7 ( $CH_3$ ), 11.8 ( $CH(CH_2)_2$ ), 7.19 ( $CH(CH_2)_2$ ), 2.14 ( $CH(CH_2)_2$ ).
- IR**  $\nu$  (cm<sup>-1</sup>) (CCl<sub>4</sub>) 1709 (C=O).
- HRMS** (EI+) calcd for  $C_{11}H_{18}O$  166.1358, found: 166.1358.

### ***General procedure C : addition of the ethyl vinyl ether***

To a stirred solution of **ethyl vinyl ether** (5n mmol) in freshly **distilled THF** (2n ml) under nitrogen and at  $-78^{\circ}\text{C}$ , was added dropwise over 10 minutes **tert-butyl lithium** (~1.35 M in pentane, 2n mmol). After 15 more minutes, the acetone/dry ice bath was replaced by a water/ice bath, and stirring was kept for 15 minutes. The flask was cooled back to  $-78^{\circ}\text{C}$ , and a solution of **cyclobutanone** (n mmol) in **distilled THF** (2n ml) was then added dropwise over 10 minutes. The mixture was then allowed to warm up to room temperature, and stirred for an additional 2 hours. Saturated ammonium chloride and diethyl ether were added to quench the reaction. The aqueous layer was then extracted with diethyl ether, and the combined organic layers were washed with brine, dried, and then concentrated under reduced pressure, yielding pure ethyl vinyl ether adduct.

### ***General procedure D : formation of the xanthate***

To a stirred solution of the **ethyl vinyl ether adduct** (n mmol) in a mixture of **acetonitrile/water (9:1)** (2n mL) under nitrogen in an ice water bath, was added a solution of **N-bromosuccinimide** (1.1n mmol) in **acetonitrile/water (9:1)** (2n mL). Stirring was kept for 20 more minutes, and the mixture was then partitioned between diethyl ether and water. The organic layer was then washed with brine, and dried over anhydrous  $\text{MgSO}_4$ . Filtration and removal of the solvent under reduced pressure, gave the  $\alpha$ -bromo ketone. IR and  $^1\text{H}$  NMR analysis could be used to see the formation of the carbonyl group.

The previous crude **bromo ketone** (n mmol) was then stirred in **acetone** (1.5n mL) under nitrogen at  $0^{\circ}\text{C}$ , and **sodium O-neopentyl xanthate** or **potassium O-ethyl xanthate** (1.2n mmol) was then added. After one hour at  $0^{\circ}\text{C}$ , the mixture was partitioned between diethyl ether and water. Brine was added to the aqueous layer, and extracted twice with diethyl ether. The combined organic layers were washed with brine, dried over anhydrous  $\text{MgSO}_4$ , filtered and the solvent were removed *in vacuo* to afford crude xanthate.

**Dithiocarbonic acid [2-(3-allyl-1-hydroxy-2,2-dimethyl-cyclohexyl)-2-oxo-ethyl] ester ethyl ester** **10a**

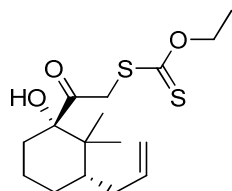

$C_{16}H_{26}O_3S_2$   
 $M = 330.51 \text{ g}\cdot\text{mol}^{-1}$   
White solid

- Reaction:** Following general procedure C, the reaction was carried out using **7a** (558 mg, 3.4 mmol). The adduct obtained was then transformed following general procedure D, using **potassium O-ethylxanthate**, to give crude xanthate **10a** as a 95 to 5 mixture of two diastereoisomers.
- Purification:** Column chromatography, elution with petroleum ether/dichloromethane (1/1).
- Yield:** 58 % (over 3 steps)
- RMN  $^1H$**  ( $\delta$ , ppm) (CDCl<sub>3</sub>, 400 MHz) 5.70 (m, 1H, CH<sub>2</sub>=CH), 4.98 (m, 2H, CH<sub>2</sub>=CH), 4.64 (q, J= 7.1 Hz, 2H, OCH<sub>2</sub>CH<sub>3</sub>), 4.58 (d, J=18.0 Hz, 1H, SCH<sub>2</sub>), 4.25 (d, J=18.0 Hz, 1H, SCH<sub>2</sub>), 2.27 (m, 1H, CH<sub>2</sub>CH=CH<sub>2</sub>), 2.12 (m, 1H, CHC(Me)<sub>2</sub>), 2.00 (s, 1H, OH), 1.86 – 1.93 (m, 1H, CH<sub>2</sub>COH), 1.61 – 1.72 (m, 2H, CH<sub>2</sub>CH=CH<sub>2</sub> and CH<sub>2</sub>CH<sub>2</sub>CH), 1.52 – 1.61 (m, 3H, CH<sub>2</sub>COH and CH<sub>2</sub>CH<sub>2</sub>CH), 1.42 (t, J=7.1 Hz, 3H, OCH<sub>2</sub>CH<sub>3</sub>), 1.02 – 1.15 (m, 1H, CH<sub>2</sub>CH<sub>2</sub>CH), 0.97 (s, 3H, C(CH<sub>3</sub>)<sub>2</sub>), 0.91 (s, 3H, C(CH<sub>3</sub>)<sub>2</sub>).
- RMN  $^{13}C$**  ( $\delta$ , ppm) (CDCl<sub>3</sub>, 100.6 MHz) 214.1 (C=S), 206.7 (C=O), 138.7 (CH=CH<sub>2</sub>), 115.3 (CH=CH<sub>2</sub>), 83.4 (COH), 70.5 (OCH<sub>2</sub>), 45.3 (SCH<sub>2</sub>), 41.5 (C(CH<sub>3</sub>)<sub>2</sub>), 41.3 (CH), 34.9 (CH<sub>2</sub>-CH=CH<sub>2</sub>), 33.6 (CH<sub>2</sub>COH), 25.8 (CH<sub>2</sub>CH<sub>2</sub>CH), 22.4 (C(CH<sub>3</sub>)<sub>2</sub>), 20.8 (CH<sub>2</sub>CH<sub>2</sub>CH), 16.1 (C(CH<sub>3</sub>)<sub>2</sub>), 13.8 (CH<sub>2</sub>CH<sub>3</sub>).
- IR**  $\nu$  (cm<sup>-1</sup>) (CCl<sub>4</sub>) 3623 (OH), 1714 (C=O), 1224, 1053 (C=S, C-O).
- HRMS** (EI+) calcd for C<sub>16</sub>H<sub>26</sub>O<sub>3</sub>S<sub>2</sub> 330.1324, found: 330.1317.



**Dithiocarbonic acid ethyl ester {2-[1-hydroxy-2,2-dimethyl-3-(2-methylallyl)-cyclohexyl]-2-oxo-ethyl} ester** **10b**

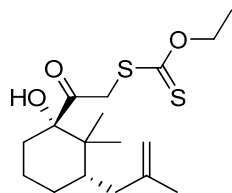

$C_{17}H_{28}O_3S_2$   
 $M = 344.53 \text{ g}\cdot\text{mol}^{-1}$   
White solid

- Reaction:** Following general procedure C, the reaction was carried out using **7b** (328 mg, 1.8 mmol). The adduct thus obtained was then transformed following general procedure D, using **potassium O-ethylxanthate**, to give crude **10b**.
- Purification:** Column chromatography, elution with petroleum ether/ethyl acetate (93/7).
- Yield:** 37 %
- RMN  $^1\text{H}$**  ( $\delta$ , ppm) (CDCl<sub>3</sub>, 400 MHz) 4.70 (s, 1H, C=CH<sub>2</sub>), 4.63 (s, 1H, C=CH<sub>2</sub>), 4.62 (q, J= 6.9 Hz, 2H, OCH<sub>2</sub>CH<sub>3</sub>), 4.58 (d, J=18.2 Hz, 1H, SCH<sub>2</sub>), 4.24 (d, J=18.0 Hz, 1H, SCH<sub>2</sub>), 2.21 – 2.29 (m, 1H, CH<sub>2</sub>CH<sub>2</sub>CH<sub>2</sub>CHCH<sub>2</sub>), 2.09 – 2.15 (m, 1H, CH<sub>2</sub>CH<sub>2</sub>CH<sub>2</sub>CHCH<sub>2</sub>), 2.12 (s, 1H, OH), 1.87 – 1.92 (m, 1H, CH<sub>2</sub>CH<sub>2</sub>CH<sub>2</sub>CHCH<sub>2</sub>), 1.65 – 1.70 (m, 1H, CH<sub>2</sub>CH<sub>2</sub>CH<sub>2</sub>CHCH<sub>2</sub>), 1.67 (s, 3H, CH<sub>3</sub>-C=CH<sub>2</sub>), 1.50 – 1.63 (m, 4H, CH<sub>2</sub>CH<sub>2</sub>CH<sub>2</sub>CHCH<sub>2</sub>), 1.40 (t, J=7.1 Hz, 3H, OCH<sub>2</sub>CH<sub>3</sub>), 0.98 – 1.08 (m, 1H, CH<sub>2</sub>CH<sub>2</sub>CH<sub>2</sub>CHCH<sub>2</sub>), 0.94 (s, 3H, C(CH<sub>3</sub>)<sub>2</sub>), 0.89 (s, 3H, C(CH<sub>3</sub>)<sub>2</sub>).
- RMN  $^{13}\text{C}$**  ( $\delta$ , ppm) (CDCl<sub>3</sub>, 100.6 MHz) 214.0 (C=S), 206.7 (C=O), 144.9 (C<sub>q</sub>=CH<sub>2</sub>), 111.5 (CH=CH<sub>2</sub>), 83.4 (COH), 70.4 (OCH<sub>2</sub>), 45.3 (SCH<sub>2</sub>), 41.4 (C(CH<sub>3</sub>)<sub>2</sub>), 39.0 (CH<sub>2</sub>C<sub>q</sub>=CH<sub>2</sub>), 38.7 (CH), 33.5 (CH<sub>2</sub>-COH), 25.7 (CH<sub>2</sub>CH<sub>2</sub>CH), 22.12, 22.07 (C(CH<sub>3</sub>)<sub>2</sub>, CH<sub>3</sub>C=CH<sub>2</sub>), 20.8 (CH<sub>2</sub>CH<sub>2</sub>CH), 15.9 (C(CH<sub>3</sub>)<sub>2</sub>), 13.7 (CH<sub>2</sub>CH<sub>3</sub>).
- IR**  $\nu$  (cm<sup>-1</sup>) (CCl<sub>4</sub>) 3623, 3495 (OH), 1715 (C=O), 1223, 1053 (C=S, C-O).
- HRMS** (EI+) calcd for C<sub>17</sub>H<sub>28</sub>O<sub>3</sub>S<sub>2</sub> 344.1480, found: 344.1474.

**Dithiocarbonic acid ethyl ester [2-(1-hydroxy-2,2,3-trimethyl-cyclohexyl)-2-oxo-ethyl] ester** **10c**

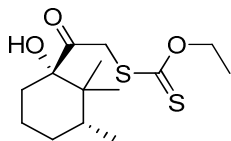

$C_{14}H_{24}O_3S_2$   
 $M = 304.47 \text{ g}\cdot\text{mol}^{-1}$   
White solid

**Reaction:** Following general procedure C, the reaction was carried out using **7c** (420 mg, 3 mmol). The adduct thus obtained was then transformed following general procedure D, using **potassium O-ethylxanthate**, to give crude **10c**.

**Purification:** Crude washed with cold petroleum ether/diethyl ether

**Yield:** 70 %

**RMN  $^1\text{H}$**  ( $\delta$ , ppm) (CDCl<sub>3</sub>, 400 MHz) 4.63 (q, J= 7.1 Hz, 2H, OCH<sub>2</sub>CH<sub>3</sub>), 4.58 (d, J=18.0 Hz, 1H, SCH<sub>2</sub>), 4.25 (d, J=18.0 Hz, 1H, SCH<sub>2</sub>), 2.22 (m, 1H, CHC(Me)<sub>2</sub>), 2.00 (s, 1H, OH), 1.84 – 1.91 (m, 1H, CH<sub>2</sub>CH<sub>2</sub>CH<sub>2</sub>), 1.50 – 1.72 (m, 3H, CH<sub>2</sub>CH<sub>2</sub>CH<sub>2</sub>), 1.42 – 1.50 (m, 1H, CH<sub>2</sub>CH<sub>2</sub>CH<sub>2</sub>), 1.42 (t, J=7.1 Hz, 3H, OCH<sub>2</sub>CH<sub>3</sub>), 1.16 – 1.26 (m, 1H, CH<sub>2</sub>CH<sub>2</sub>CH<sub>2</sub>), 0.92 (s, 3H, C(CH<sub>3</sub>)<sub>2</sub>), 0.90 (s, 3H, C(CH<sub>3</sub>)<sub>2</sub>), 0.83 (d, J=6.9Hz, 3H, CHCH<sub>3</sub>).

**RMN  $^{13}\text{C}$**  ( $\delta$ , ppm) (CDCl<sub>3</sub>, 100.6 MHz) 214.1 (C=S), 206.9 (C=O), 83.4 (COH), 70.4 (OCH<sub>2</sub>), 45.3 (SCH<sub>2</sub>), 41.4 (C(CH<sub>3</sub>)<sub>2</sub>), 35.7 (CH), 33.6 (CH<sub>2</sub>COH), 29.4 (CH<sub>2</sub>CH<sub>2</sub>CH), 22.4 (C(CH<sub>3</sub>)<sub>2</sub>), 21.1 (CH<sub>2</sub>CH<sub>2</sub>CH), 16.0 (C(CH<sub>3</sub>)<sub>2</sub>), 15.1 (CH<sub>3</sub>-CH), 13.8 (CH<sub>2</sub>CH<sub>3</sub>).

**IR**  $\nu$  (cm<sup>-1</sup>) (CCl<sub>4</sub>) 3624, 3494 (OH), 1716 (C=O), 1224, 1053 (C=S, C-O).

**HRMS** (EI+) calcd for C<sub>14</sub>H<sub>24</sub>O<sub>3</sub>S<sub>2</sub> 304.1167, found: 304.1168.

**Dithiocarbonic acid ethyl ester [2-(3-ethyl-1-hydroxy-2,2-dimethyl-cyclohexyl)-2-oxo-ethyl] ester** **10d**

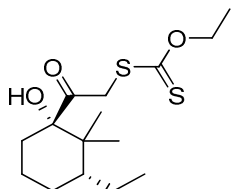

$C_{15}H_{26}O_3S_2$   
 $M = 318.50 \text{ g}\cdot\text{mol}^{-1}$   
White solid

**Reaction:** Following general procedure C, the reaction was carried out using **7d** (1.13 g, 7.3 mmol). The adduct thus obtained was then transformed following general procedure D, using **potassium O-ethylxanthate**, to give crude **10d**.

|                                                                 |                                                                                                                                                                                                                                                                                                                                                                                                                                                                                                                                                                                                                                                                                                                                                        |
|-----------------------------------------------------------------|--------------------------------------------------------------------------------------------------------------------------------------------------------------------------------------------------------------------------------------------------------------------------------------------------------------------------------------------------------------------------------------------------------------------------------------------------------------------------------------------------------------------------------------------------------------------------------------------------------------------------------------------------------------------------------------------------------------------------------------------------------|
| Purification:                                                   | Crude washed with cold petroleum ether/diethyl ether                                                                                                                                                                                                                                                                                                                                                                                                                                                                                                                                                                                                                                                                                                   |
| Yield:                                                          | 70 %                                                                                                                                                                                                                                                                                                                                                                                                                                                                                                                                                                                                                                                                                                                                                   |
| RMN <sup>1</sup> H (δ, ppm)<br>(CDCl <sub>3</sub> , 400 MHz)    | 4.63 (q, J= 7.1 Hz, 2H, OCH <sub>2</sub> CH <sub>3</sub> ), 4.58 (d, J=18.1 Hz, 1H, SCH <sub>2</sub> ), 4.24 (d, J=18.1 Hz, 1H, SCH <sub>2</sub> ), 2.02 (s, 1H, OH), 1.83 – 1.91 (m, 2H, CH <sub>2</sub> CH <sub>2</sub> CH <sub>2</sub> CH), 1.68 – 1.76 (m, 1H, CH <sub>2</sub> CH <sub>2</sub> CH <sub>2</sub> CH), 1.45 – 1.68 (m, 4H, CH <sub>2</sub> CH <sub>2</sub> CH <sub>2</sub> CH), 1.41 (t, J=7.1 Hz, 3H, OCH <sub>2</sub> CH <sub>3</sub> ), 1.16 – 1.26 (m, 1H, CH <sub>2</sub> CH <sub>2</sub> CH <sub>2</sub> ), 1.00 – 1.10 (m, 1H, CHCH <sub>2</sub> CH <sub>3</sub> ), 0.93 (s, 3H, C(CH <sub>3</sub> ) <sub>2</sub> ), 0.87 (s, 3H, C(CH <sub>3</sub> ) <sub>2</sub> ), 0.84 – 0.90 (m, 4H, CHCH <sub>2</sub> CH <sub>3</sub> ). |
| RMN <sup>13</sup> C (δ, ppm)<br>(CDCl <sub>3</sub> , 100.6 MHz) | 214.1 (C=S), 206.8 (C=O), 83.4 (COH), 70.4 (OCH <sub>2</sub> ), 45.4 (SCH <sub>2</sub> ), 43.6 (CH), 41.7 (C(CH <sub>3</sub> ) <sub>2</sub> ), 33.5 (CH <sub>2</sub> COH), 25.4 (CH <sub>2</sub> CH <sub>2</sub> CH), 22.7 (CHCH <sub>2</sub> CH <sub>3</sub> ), 22.2 (C(CH <sub>3</sub> ) <sub>2</sub> ), 20.9 (CH <sub>2</sub> CH <sub>2</sub> CH), 15.9 (C(CH <sub>3</sub> ) <sub>2</sub> ), 13.7 (OCH <sub>2</sub> CH <sub>3</sub> ), 13.3 (CHCH <sub>2</sub> CH <sub>3</sub> ).                                                                                                                                                                                                                                                                   |
| IR ν (cm <sup>-1</sup> ) (CCl <sub>4</sub> )                    | 3623, 3496 (OH), 1716 (C=O), 1224, 1053 (C=S, C-O).                                                                                                                                                                                                                                                                                                                                                                                                                                                                                                                                                                                                                                                                                                    |
| HRMS (EI+)                                                      | calcd for C <sub>15</sub> H <sub>26</sub> O <sub>3</sub> S <sub>2</sub> 318.1324, found: 318.1314.                                                                                                                                                                                                                                                                                                                                                                                                                                                                                                                                                                                                                                                     |

**Dithiocarbonic acid ethyl ester [2-(1-hydroxy-3-isopropyl-2,2-dimethyl-cyclohexyl)-2-oxo-ethyl] ester** **10e**

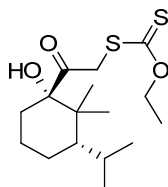

C<sub>16</sub>H<sub>28</sub>O<sub>3</sub>S<sub>2</sub>  
M = 332.52 g.mol<sup>-1</sup>  
White solid

|                                                              |                                                                                                                                                                                                                                                                                                                                                                                                                                                                                                                                                                                                                                                                                                                                                                                   |
|--------------------------------------------------------------|-----------------------------------------------------------------------------------------------------------------------------------------------------------------------------------------------------------------------------------------------------------------------------------------------------------------------------------------------------------------------------------------------------------------------------------------------------------------------------------------------------------------------------------------------------------------------------------------------------------------------------------------------------------------------------------------------------------------------------------------------------------------------------------|
| Reaction:                                                    | Following general procedure C, the reaction was carried out using <b>7e</b> (723 mg, 4.3 mmol). The adduct thus obtained was then transformed following general procedure D, using <b>potassium O-ethylxanthate</b> , to give crude <b>10e</b> .                                                                                                                                                                                                                                                                                                                                                                                                                                                                                                                                  |
| Purification:                                                | Crude washed with cold petroleum ether/diethyl ether                                                                                                                                                                                                                                                                                                                                                                                                                                                                                                                                                                                                                                                                                                                              |
| Yield:                                                       | 74 %                                                                                                                                                                                                                                                                                                                                                                                                                                                                                                                                                                                                                                                                                                                                                                              |
| RMN <sup>1</sup> H (δ, ppm)<br>(CDCl <sub>3</sub> , 400 MHz) | 4.63 (q, J= 7.1 Hz, 2H, OCH <sub>2</sub> CH <sub>3</sub> ), 4.58 (d, J=18.3 Hz, 1H, SCH <sub>2</sub> ), 4.24 (d, J=18.1 Hz, 1H, SCH <sub>2</sub> ), 2.06 (dd, J=2.8Hz, J=13.0Hz, 1H, CH <sub>2</sub> CH <sub>2</sub> CH <sub>2</sub> CH), 1.91 (s, 1H, OH), 1.80 – 1.90 (m, 2H, CH <sub>2</sub> CH <sub>2</sub> CH <sub>2</sub> CH), 1.68 – 1.76 (m, 1H, CH <sub>2</sub> CH <sub>2</sub> CH <sub>2</sub> CH), 1.44 – 1.65 (m, 4H, CH <sub>2</sub> CH <sub>2</sub> CH <sub>2</sub> CH), 1.42 (t, J=7.1 Hz, 3H, OCH <sub>2</sub> CH <sub>3</sub> ), 1.15 – 1.28 (m, 1H, CH(CH <sub>3</sub> ) <sub>2</sub> ), 0.94 (s, 6H, C(CH <sub>3</sub> ) <sub>2</sub> ), 0.91 (d, J=6.9Hz, 3H, CH(CH <sub>3</sub> ) <sub>2</sub> ), 0.82 (d, J=6.9Hz, 3H, CH(CH <sub>3</sub> ) <sub>2</sub> ). |

**RMN  $^{13}\text{C}$**  ( $\delta$ , ppm) 214.1 (C=S), 206.7 (C=O), 83.5 (COH), 70.4 (OCH<sub>2</sub>), 45.53 (CH), (CDCl<sub>3</sub>, 100.6 MHz) 45.48 (SCH<sub>2</sub>), 42.8 (C(CH<sub>3</sub>)<sub>2</sub>), 33.9 (CH<sub>2</sub>COH), 25.5, 25.3, 22.2 (C(CH<sub>3</sub>)<sub>2</sub>, CH(CH<sub>3</sub>)<sub>2</sub>), 21.35, 21.30 (CH<sub>2</sub>CH<sub>2</sub>), 19.2, 16.6 (C(CH<sub>3</sub>)<sub>2</sub>, CH(CH<sub>3</sub>)<sub>2</sub>), 13.8 (CH<sub>2</sub>CH<sub>3</sub>).

**IR**  $\nu$  (cm<sup>-1</sup>) (CCl<sub>4</sub>) 3623, 3424 (OH), 1718 (C=O), 1223, 1053 (C=S, C-O).

**HRMS** (EI+) calcd for C<sub>16</sub>H<sub>28</sub>O<sub>3</sub>S<sub>2</sub> 332.1480, found: 332.1476.

**Dithiocarbonic acid ethyl ester [2-(1-hydroxy-2,2-dimethyl-3-pentyl-cyclohexyl)-2-oxo-ethyl] ester** **10f**

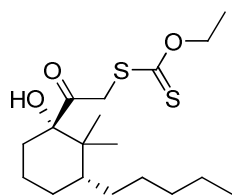

C<sub>18</sub>H<sub>32</sub>O<sub>3</sub>S<sub>2</sub>  
M = 360.57 g.mol<sup>-1</sup>  
White solid

**Reaction:** Following general procedure C, the reaction was carried out using **7f** (809 mg, 4.1 mmol). The adduct thus obtained was then transformed following general procedure D, using **potassium O-ethylxanthate**, to give crude **10f**.

**Purification:** Crude washed with cold petroleum ether

**Yield:** 72 %

**RMN  $^1\text{H}$**  ( $\delta$ , ppm) 4.64 (q, J= 7.1 Hz, 2H, OCH<sub>2</sub>CH<sub>3</sub>), 4.59 (d, J=18.3 Hz, 1H, SCH<sub>2</sub>), 4.24 (d, J=18.0 Hz, 1H, SCH<sub>2</sub>), 1.99 (s, 1H, OH), 1.92 – 2.02 (m, 1H, CH<sub>2</sub>CH<sub>2</sub>CH<sub>2</sub>CH), 1.86 – 1.92 (m, 1H, (CH<sub>2</sub>)<sub>3</sub>CH), 1.50 – 1.74 (m, 5H, (CH<sub>2</sub>)<sub>3</sub>CH(CH<sub>2</sub>)<sub>4</sub>), 1.35 – 1.44 (m, 1H, (CH<sub>2</sub>)<sub>3</sub>CH(CH<sub>2</sub>)<sub>4</sub>), 1.42 (t, J=7.1 Hz, 3H, OCH<sub>2</sub>CH<sub>3</sub>), 1.00 – 1.32 (m, 6H, (CH<sub>2</sub>)<sub>3</sub>CH(CH<sub>2</sub>)<sub>4</sub>), 0.93 (s, 3H, C(CH<sub>3</sub>)<sub>2</sub>), 0.88 (s, 3H, C(CH<sub>3</sub>)<sub>2</sub>), 0.84 – 0.96 (m, 4H, (CH<sub>2</sub>)<sub>4</sub>CH<sub>3</sub>).

**RMN  $^{13}\text{C}$**  ( $\delta$ , ppm) 214.0 (C=S), 206.8 (C=O), 83.4 (COH), 70.4 (OCH<sub>2</sub>), 45.4 (SCH<sub>2</sub>), 41.6 (CH), 41.5 (C(CH<sub>3</sub>)<sub>2</sub>), 33.5 (CH<sub>2</sub>COH), 32.2, 30.0, 28.3, 26.2, 22.6, 20.9 (CH<sub>2</sub>CH<sub>2</sub>CH(CH<sub>2</sub>)<sub>4</sub>), 22.1 (C(CH<sub>3</sub>)<sub>2</sub>), 15.9 (C(CH<sub>3</sub>)<sub>2</sub>), 14.0 ((CH<sub>2</sub>)<sub>4</sub>CH<sub>3</sub>), 13.7 (OCH<sub>2</sub>CH<sub>3</sub>).

**IR**  $\nu$  (cm<sup>-1</sup>) (CCl<sub>4</sub>) 3624 (OH), 1715 (C=O), 1224, 1053 (C=S, C-O).

**HRMS** (EI+) calcd for C<sub>18</sub>H<sub>32</sub>O<sub>3</sub>S<sub>2</sub> 360.1793, found: 360.1802.

**Dithiocarbonic acid [2-(3-cyclopentyl-1-hydroxy-2,2-dimethyl-cyclohexyl)-2-oxo-ethyl] ester ethyl ester 10g**

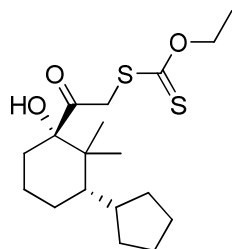

$C_{18}H_{30}O_3S_2$   
 $M = 358.56 \text{ g}\cdot\text{mol}^{-1}$   
White solid

**Reaction:** Following general procedure C, the reaction was carried out using **7g** (742 mg, 3.8 mmol). The adduct thus obtained was then transformed following general procedure D, using **potassium O-ethylxanthate**, to give crude **10g**.

**Purification:** Brominated compound was simply filtered.

**Yield:** 65 %

**RMN  $^1\text{H}$**  ( $\delta$ , ppm) (CDCl<sub>3</sub>, 400 MHz) 4.64 (q, J=7.2 Hz, 2H, OCH<sub>2</sub>CH<sub>3</sub>), 4.58 (d, J=18.1 Hz, 1H, SCH<sub>2</sub>), 4.26 (d, J=18.0 Hz, 1H, SCH<sub>2</sub>), 2.21 (td, J=3.5Hz, J=12.7Hz, 1H, CH<sub>2</sub>COH), 1.91 (s, 1H, OH), 1.84 – 1.92 (m, 2H, CH<sub>2</sub>COH, (CH<sub>2</sub>)<sub>2</sub>CHCH(CH<sub>2</sub>)<sub>4</sub>), 1.67 – 1.76 (m, 1H, (CH<sub>2</sub>)<sub>2</sub>CHCH(CH<sub>2</sub>)<sub>4</sub>), 1.45 – 1.64 (m, 8H, (CH<sub>2</sub>)<sub>2</sub>CHCH(CH<sub>2</sub>)<sub>4</sub>), 1.42 (t, J=7.1 Hz, 3H, OCH<sub>2</sub>CH<sub>3</sub>), 1.17 – 1.32 (m, 4H, (CH<sub>2</sub>)<sub>2</sub>CHCH(CH<sub>2</sub>)<sub>4</sub>), 0.96 (s, 3H, C(CH<sub>3</sub>)<sub>2</sub>), 0.93 (s, 3H, C(CH<sub>3</sub>)<sub>2</sub>).

**RMN  $^{13}\text{C}$**  ( $\delta$ , ppm) (CDCl<sub>3</sub>, 100.6 MHz) 214.0 (C=S), 206.7 (C=O), 83.6 (COH), 70.4 (OCH<sub>2</sub>), 45.5 (SCH<sub>2</sub>), 44.1 (CHC(Me)<sub>2</sub>), 42.6 (C(CH<sub>3</sub>)<sub>2</sub>), 39.5 (CH(CH<sub>2</sub>)<sub>4</sub>), 33.9 (CH<sub>2</sub>), 33.8 (CH<sub>2</sub>), 29.2 (CH<sub>2</sub>), 25.9 (CH<sub>2</sub>), 24.7 (CH<sub>2</sub>), 23.0 (C(CH<sub>3</sub>)<sub>2</sub>), 22.9 (CH<sub>2</sub>), 21.4 (CH<sub>2</sub>), 17.0 (C(CH<sub>3</sub>)<sub>2</sub>), 13.7 (CH<sub>2</sub>CH<sub>3</sub>).

**IR**  $\nu$  (cm<sup>-1</sup>) (CCl<sub>4</sub>) 3624 (OH), 1715 (C=O), 1223, 1052 (C=S, C-O).

**HRMS** (EI+) calcd for C<sub>18</sub>H<sub>30</sub>O<sub>3</sub>S<sub>2</sub> 358.1637, found: 358.1639.

**Dithiocarbonic acid [2-(3-cyclopropyl-1-hydroxy-2,2-dimethyl-cyclohexyl)-2-oxo-ethyl] ester ethyl ester 10h**

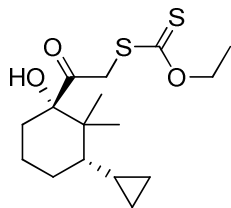

$C_{16}H_{26}O_3S_2$   
 $M = 330.51 \text{ g}\cdot\text{mol}^{-1}$   
White solid

**Reaction:** Following general procedure C, the reaction was carried out using **7h** (158 mg, 0.95 mmol). The adduct thus obtained was then transformed following general procedure D, using **potassium O-ethylxanthate**, to give crude **10h**.

**Purification:** Crude washed with cold petroleum ether

**Yield:** 80 %

**RMN  $^1\text{H}$**  ( $\delta$ , ppm) (CDCl<sub>3</sub>, 400 MHz) 4.62 (q, J=7.1 Hz, 2H, OCH<sub>2</sub>CH<sub>3</sub>), 4.56 (d, J=18.0 Hz, 1H, SCH<sub>2</sub>), 4.22 (d, J=18.0 Hz, 1H, SCH<sub>2</sub>), 2.09 (s, 1H, OH), 1.87 (dd, J=2.6Hz, J=9.2Hz, 1H, CH<sub>2</sub>CH<sub>2</sub>CH<sub>2</sub>), 1.51 – 1.66 (m, 4H, CH<sub>2</sub>CH<sub>2</sub>CH<sub>2</sub>), 1.3 – 1.4 (m, 1H, CH<sub>2</sub>CH<sub>2</sub>CH<sub>2</sub>), 1.40 (t, J=7.1Hz, 3H, OCH<sub>2</sub>CH<sub>3</sub>), 1.18 – 1.28 (m, 1H, C(Me)<sub>2</sub>CH), 1.04 (s, 3H, C(CH<sub>3</sub>)<sub>2</sub>), 1.02 (s, 3H, C(CH<sub>3</sub>)<sub>2</sub>), 0.52 – 0.60 (m, 1H, C(Me)<sub>2</sub>CHCH), 0.44 – 0.52 (m, 1H, C(Me)<sub>2</sub>CHCH(CH<sub>2</sub>)<sub>2</sub>), 0.29 – 0.37 (m, 1H, C(Me)<sub>2</sub>CHCH(CH<sub>2</sub>)<sub>2</sub>), 0.17 (dt, J=5.1Hz, J=9.4Hz, 1H, C(Me)<sub>2</sub>CHCH(CH<sub>2</sub>)<sub>2</sub>), -0.09 (dt, J=5.1Hz, J=9.3Hz, 1H, C(Me)<sub>2</sub>CHCH(CH<sub>2</sub>)<sub>2</sub>).

**RMN  $^{13}\text{C}$**  ( $\delta$ , ppm) (CDCl<sub>3</sub>, 100.6 MHz) 214.0 (C=S), 207.1 (C=O), 83.4 (COH), 70.4 (OCH<sub>2</sub>), 46.9 (CHC(Me)<sub>2</sub>), 45.3 (SCH<sub>2</sub>), 42.7 (C(CH<sub>3</sub>)<sub>2</sub>), 33.3 (CH<sub>2</sub>C(OH)), 27.1 (CH<sub>2</sub>CH<sub>2</sub>CH<sub>2</sub>C(OH)), 23.0 (C(CH<sub>3</sub>)<sub>2</sub>), 20.9 (CH<sub>2</sub>CH<sub>2</sub>C(OH)), 16.8 (C(CH<sub>3</sub>)<sub>2</sub>), 13.7 (CH<sub>2</sub>CH<sub>3</sub>), 12.4 (CHCHC(Me)<sub>2</sub>), 6.8 ((CH<sub>2</sub>)<sub>2</sub>CHCHC(Me)<sub>2</sub>), 2.4 ((CH<sub>2</sub>)<sub>2</sub>CHCHC(Me)<sub>2</sub>).

**IR**  $\nu$  (cm<sup>-1</sup>) (CCl<sub>4</sub>) 3624 (OH), 3078 (C-H, cyclopropyl), 1714 (C=O), 1224, 1054 (C=S, C-O).

**HRMS** (EI+) calcd for C<sub>16</sub>H<sub>26</sub>O<sub>3</sub>S<sub>2</sub> 330.1323, found: 330.1316.

### **General procedure E: radical fragmentation of the cyclohexane.**

A solution of **xanthate** (n mmol) in **chlorobenzene** (10n ml), was refluxed under nitrogen for 15 minutes. **Dilauroyl peroxide** was then added by portion of 10% every 20 minutes, until the reaction is over. The solvent was then removed *in vacuo*, giving crude vicinal diketone.

#### **7-Isopropylidene-dec-9-ene-2,3-dione**

**11a**

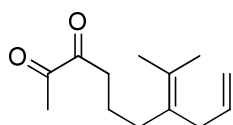

$C_{13}H_{20}O_2$   
 $M = 208.30 \text{ g}\cdot\text{mol}^{-1}$   
Yellow oil

|                                                                             |                                                                                                                                                                                                                                                                                                                                                                                            |
|-----------------------------------------------------------------------------|--------------------------------------------------------------------------------------------------------------------------------------------------------------------------------------------------------------------------------------------------------------------------------------------------------------------------------------------------------------------------------------------|
| Reaction:                                                                   | Following general procedure E, the reaction was carried out using xanthate <b>10a</b> (165 mg, 0.5 mmol).                                                                                                                                                                                                                                                                                  |
| Purification:                                                               | Column chromatography, elution with petroleum ether/ethyl acetate (95/5).                                                                                                                                                                                                                                                                                                                  |
| Yield:                                                                      | 45 %                                                                                                                                                                                                                                                                                                                                                                                       |
| <b>RMN <math>^1H</math></b> ( $\delta$ , ppm)<br>( $CDCl_3$ , 400 MHz)      | 5.73 (tdd, $J=6.4 \text{ Hz}$ , $J=10.0 \text{ Hz}$ , $J=16.6 \text{ Hz}$ , 1H, $CH=CH_2$ ), 4.93 – 5.01 (m, 2H, $CH=CH_2$ ), 2.76 (d, $J=6.3 \text{ Hz}$ , 2H, $CH_2-CH=CH_2$ ), 2.71 (t, $J=7.2 \text{ Hz}$ , 2H, $CH_2CO$ ), 2.32 (s, 3H, $CH_3CO$ ), 2.04 (m, 2H, $CH_2C=C(Me)_2$ ), 1.65 (s, 3H, $C=C(CH_3)_2$ ), 1.67 (s, 3H, $C=C(CH_3)_2$ ), 1.62 – 1.70 (m, 2H, $CH_2CH_2CH_2$ ). |
| <b>RMN <math>^{13}C</math></b> ( $\delta$ , ppm)<br>( $CDCl_3$ , 100.6 MHz) | 199.4 ( $C=O$ ), 197.6 ( $C=O$ ), 136.5 ( $CH=CH_2$ ), 128.9, 127.4 ( $C_q=C_q(Me)_2$ ), 114.6 ( $CH=CH_2$ ), 36.6, 35.4 ( $CH_2CO$ , $CH_2CH=CH_2$ ), 31.5 ( $CH_2CH_2C=C(Me)_2$ ), 23.8 ( $CH_3CO$ ), 21.9 ( $CH_2CH_2CH_2$ ), 20.5, 20.4 ( $C=C(CH_3)_2$ ).                                                                                                                             |
| <b>IR</b> $\nu$ ( $cm^{-1}$ ) ( $CCl_4$ )                                   | 1716 ( $C=O$ ).                                                                                                                                                                                                                                                                                                                                                                            |
| <b>HRMS</b> (EI+)                                                           | calcd for $C_{13}H_{20}O_2$ 208.1463, found: 208.1470.                                                                                                                                                                                                                                                                                                                                     |

**7-Isopropylidene-9-methyl-dec-9-ene-2,3-dione**

**11b**

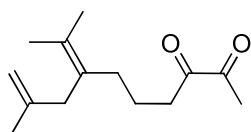

$C_{14}H_{22}O_2$   
 $M = 222.32 \text{ g}\cdot\text{mol}^{-1}$   
Yellow oil

- Reaction:** Following general procedure E, the reaction was carried out using xanthate **10b** (86 mg, 0.25 mmol).
- Purification:** Column chromatography, elution with petroleum ether/diethyl ether (97/3).
- Yield:** 45 %
- RMN  $^1\text{H}$**  ( $\delta$ , ppm) (CDCl<sub>3</sub>, 400 MHz) 4.71 (s, 1H, C=CH<sub>2</sub>), 4.62 (s, 1H, C=CH<sub>2</sub>), 2.68 – 2.72 (m, 4H, C=C-CH<sub>2</sub>-C=C, CH<sub>2</sub>CO), 2.32 (s, CH<sub>3</sub>CO), 2.02 (m, 2H, CH<sub>2</sub>CH<sub>2</sub>C=C), 1.69 (s, 3H, CH<sub>3</sub>-C=C), 1.67 (s, 3H, CH<sub>3</sub>-C=C), 1.64 (s, 3H, CH<sub>3</sub>-C=C), 1.6 – 1.7 (m, 2H, CH<sub>2</sub>CH<sub>2</sub>C=C).
- RMN  $^{13}\text{C}$**  ( $\delta$ , ppm) (CDCl<sub>3</sub>, 100.6 MHz) 199.4 (C=O), 197.5 (C=O), 144.1 (C<sub>q</sub>=CH<sub>2</sub>), 129.0, 127.8 (C<sub>q</sub>=C<sub>q</sub>(Me)<sub>2</sub>), 110.4 (CH=CH<sub>2</sub>), 40.2 (CH<sub>2</sub>C<sub>q</sub>=CH<sub>2</sub>), 35.5 (CH<sub>2</sub>CO), 31.3 (CH<sub>2</sub>CH<sub>2</sub>C=C(Me)<sub>2</sub>), 23.7, 22.5 (CH<sub>3</sub>CO, CH<sub>3</sub>C<sub>q</sub>=C), 22.0 (CH<sub>2</sub>CH<sub>2</sub>CH<sub>2</sub>), 20.6, 20.4 (C=C(CH<sub>3</sub>)<sub>2</sub>).
- IR**  $\nu$  (cm<sup>-1</sup>) (CCl<sub>4</sub>) 1716 (C=O).
- HRMS** (EI+) calcd for C<sub>14</sub>H<sub>22</sub>O<sub>2</sub> 222.1620, found: 222.1622.

**7,8-Dimethyl-non-7-ene-2,3-dione**

**11 c**

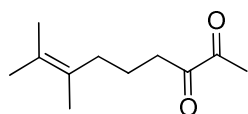

$C_{11}H_{18}O_2$   
 $M = 182.26 \text{ g}\cdot\text{mol}^{-1}$   
Yellow oil

- Reaction:** Following general procedure E, the reaction was carried out using xanthate **10c** (150 mg, 0.5 mmol).
- Purification:** Column chromatography, elution with petroleum ether/diethyl ether (97/3).
- Yield:** 74 %
- RMN  $^1\text{H}$**  ( $\delta$ , ppm) (CDCl<sub>3</sub>, 400 MHz) 2.69 (t, J=7.2 Hz, 2H, CH<sub>2</sub>CO), 2.32 (s, 3H, CH<sub>3</sub>CO), 2.05 (t, J=7.5Hz, 2H, CH<sub>2</sub>C=C(Me)<sub>2</sub>), 1.68 (quint, J=7.5Hz, CH<sub>2</sub>-CH<sub>2</sub>-CH<sub>2</sub>), 1.59 – 1.63 (m, 9H, CH<sub>3</sub>C=C(CH<sub>3</sub>)<sub>2</sub>).



**RMN  $^{13}\text{C}$**  ( $\delta$ , ppm) 199.3 (C=O), 197.4 (C=O), 126.7, 125.3 ( $\text{C}_q=\text{C}_q(\text{Me})_2$ ), 35.1 (CDCl<sub>3</sub>, 100.6 MHz) ( $\text{CH}_2\text{CO}$ ), 33.5 ( $\text{CH}_2\text{-C}=\text{C}$ ), 23.7 ( $\text{CH}_3\text{CO}$ ), 21.6 ( $\text{CH}_2\text{CH}_2\text{CH}_2$ ), 20.6 ( $\text{C}=\text{C}(\text{CH}_3)_2$ ), 20.2 ( $\text{C}=\text{C}(\text{CH}_3)_2$ ), 18.1 ( $\text{CH}_3\text{C}=\text{C}(\text{Me})_2$ ).

**IR**  $\nu$  ( $\text{cm}^{-1}$ ) (CCl<sub>4</sub>) 1716 (C=O).

**HRMS** (EI+) calcd for C<sub>11</sub>H<sub>18</sub>O<sub>2</sub> 182.1307, found: 182, 1308.

### 7-Ethyl-8-methyl-non-7-ene-2,3-dione

11d

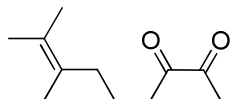

C<sub>12</sub>H<sub>20</sub>O<sub>2</sub>  
M = 196.29 g.mol<sup>-1</sup>  
Yellow oil

**Reaction:** Following general procedure E, the reaction was carried out using xanthate **10d** (159 mg, 0.5 mmol).

**Purification:** Column chromatography, elution with petroleum ether/ethyl acetate (97/3).

**Yield:** 73 %

**RMN  $^1\text{H}$**  ( $\delta$ , ppm) 2.71 (t, J=7.2 Hz, 2H,  $\text{CH}_2\text{CO}$ ), 2.33 (s, 3H,  $\text{CH}_3\text{CO}$ ), 1.96 – 2.06 (m, 4H,  $\text{CH}_2\text{C}(\text{=C})\text{CH}_2$ ), 1.63 – 1.70 (m, 2H,  $\text{CH}_2\text{-CH}_2\text{-CH}_2$ ), 1.63 (s, 3H,  $\text{C}=\text{C}(\text{CH}_3)_2$ ), 1.62 (s, 3H,  $\text{C}=\text{C}(\text{CH}_3)_2$ ), 0.92 (t, J=7.5Hz,  $\text{CH}_2\text{CH}_3$ ).

**RMN  $^{13}\text{C}$**  ( $\delta$ , ppm) 199.4 (C=O), 197.5 (C=O), 133.1, 125.2 ( $\text{C}_q=\text{C}_q(\text{Me})_2$ ), 35.4 (CDCl<sub>3</sub>, 100.6 MHz) ( $\text{CH}_2\text{CO}$ ), 31.0 ( $\text{CH}_2\text{CH}_2\text{-C}=\text{C}$ ), 25.0 ( $\text{CH}_3\text{CH}_2\text{-C}=\text{C}$ ), 23.7 ( $\text{CH}_3\text{CO}$ ), 22.1 ( $\text{CH}_2\text{CH}_2\text{CH}_2$ ), 20.3 ( $\text{C}=\text{C}(\text{CH}_3)_2$ ), 20.0 ( $\text{C}=\text{C}(\text{CH}_3)_2$ ), 13.1 ( $\text{CH}_3\text{CH}_2\text{C}=\text{C}$ ).

**IR**  $\nu$  ( $\text{cm}^{-1}$ ) (CCl<sub>4</sub>) 1716 (C=O).

**HRMS** (EI+) calcd for C<sub>12</sub>H<sub>20</sub>O<sub>2</sub> 196.1463, found: 196.1462.

### 7-Isopropyl-8-methyl-non-7-ene-2,3-dione

11e

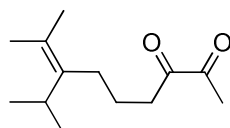

C<sub>13</sub>H<sub>22</sub>O<sub>2</sub>  
M = 210.31 g.mol<sup>-1</sup>  
Yellow oil

**Reaction:** Following general procedure E, the reaction was carried out using xanthate **10e** (166 mg, 0.5 mmol).

|                                                                 |                                                                                                                                                                                                                                                                                                                                                                                                                                       |
|-----------------------------------------------------------------|---------------------------------------------------------------------------------------------------------------------------------------------------------------------------------------------------------------------------------------------------------------------------------------------------------------------------------------------------------------------------------------------------------------------------------------|
| Purification:                                                   | Column chromatography, elution with petroleum ether/ethyl acetate (97/3).                                                                                                                                                                                                                                                                                                                                                             |
| Yield:                                                          | 73 %                                                                                                                                                                                                                                                                                                                                                                                                                                  |
| RMN <sup>1</sup> H (δ, ppm)<br>(CDCl <sub>3</sub> , 400 MHz)    | 2.85 (sept., J=7.0Hz, 1H, CH(CH <sub>3</sub> ) <sub>2</sub> ), 2.76 (t, J=7.2 Hz, 2H, CH <sub>2</sub> CO), 2.35 (s, 3H, CH <sub>3</sub> CO), 1.92 – 1.98 (m, 2H, CH <sub>2</sub> -CH <sub>2</sub> -C=C), 1.66 (s, 3H, (CH <sub>3</sub> ) <sub>2</sub> C=C), 1.65 (s, 3H, (CH <sub>3</sub> ) <sub>2</sub> C=C), 1.58 – 1.66 (m, 2H, CH <sub>2</sub> -CH <sub>2</sub> -C=C), 0.96 (d, J=6.9Hz, 6H, CH(CH <sub>3</sub> ) <sub>2</sub> ). |
| RMN <sup>13</sup> C (δ, ppm)<br>(CDCl <sub>3</sub> , 100.6 MHz) | 199.4 (C=O), 197.6 (C=O), 136.5, 124.6 (C <sub>q</sub> =C <sub>q</sub> (Me) <sub>2</sub> ), 36.1 (CH <sub>2</sub> CO), 30.1 (CH(CH <sub>3</sub> ) <sub>2</sub> ), 27.2 (CH <sub>2</sub> -C=C), 23.8 (CH <sub>3</sub> CO), 23.8 (CH <sub>2</sub> CH <sub>2</sub> CH <sub>2</sub> ), 21.3 (CH(CH <sub>3</sub> ) <sub>2</sub> ), 20.9 (C=C(CH <sub>3</sub> ) <sub>2</sub> ), 19.7 (C=C(CH <sub>3</sub> ) <sub>2</sub> ).                 |
| IR v (cm <sup>-1</sup> ) (CCl <sub>4</sub> )                    | 1716 (C=O).                                                                                                                                                                                                                                                                                                                                                                                                                           |
| HRMS (EI+)                                                      | calcd for C <sub>13</sub> H <sub>22</sub> O <sub>2</sub> 210.1620, found: 210.1610.                                                                                                                                                                                                                                                                                                                                                   |

### 7-Isopropylidene-dodecane-2,3-dione

11f

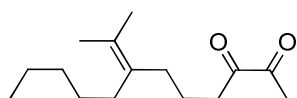

C<sub>15</sub>H<sub>26</sub>O<sub>2</sub>  
M = 238.37 g.mol<sup>-1</sup>  
Yellow oil

|                                                                 |                                                                                                                                                                                                                                                                                                                                                                                                                                                                                                                                                                                                         |
|-----------------------------------------------------------------|---------------------------------------------------------------------------------------------------------------------------------------------------------------------------------------------------------------------------------------------------------------------------------------------------------------------------------------------------------------------------------------------------------------------------------------------------------------------------------------------------------------------------------------------------------------------------------------------------------|
| Reaction:                                                       | Following general procedure E, the reaction was carried out using xanthate <b>10f</b> (180 mg, 0.5 mmol).                                                                                                                                                                                                                                                                                                                                                                                                                                                                                               |
| Purification:                                                   | Column chromatography, elution with petroleum ether/diethyl ether (97/3).                                                                                                                                                                                                                                                                                                                                                                                                                                                                                                                               |
| Yield:                                                          | 67 %                                                                                                                                                                                                                                                                                                                                                                                                                                                                                                                                                                                                    |
| RMN <sup>1</sup> H (δ, ppm)<br>(CDCl <sub>3</sub> , 400 MHz)    | 2.76 (t, J=7.2 Hz, 2H, CH <sub>2</sub> CO), 2.33 (s, 3H, CH <sub>3</sub> CO), 2.00 – 2.06 (m, 2H, CH <sub>2</sub> C=C(Me) <sub>2</sub> ), 1.93 – 1.98 (m, 2H, CH <sub>2</sub> C=C(Me) <sub>2</sub> ), 1.62 – 1.70 (m, 2H, CH <sub>2</sub> CH <sub>2</sub> CH <sub>2</sub> ), 1.63 (s, 6H, (CH <sub>3</sub> ) <sub>2</sub> C=C), 1.22 – 1.36 (m, 6H, (CH <sub>2</sub> ) <sub>3</sub> CH <sub>3</sub> ), 0.89 (t, J=7.0Hz, 3H, CH <sub>2</sub> CH <sub>3</sub> ).                                                                                                                                         |
| RMN <sup>13</sup> C (δ, ppm)<br>(CDCl <sub>3</sub> , 100.6 MHz) | 199.4 (C=O), 197.5 (C=O), 131.9, 125.6 (C <sub>q</sub> =C <sub>q</sub> (Me) <sub>2</sub> ), 35.4 (CH <sub>2</sub> CO), 32.09 (CH <sub>2</sub> -C=C(Me) <sub>2</sub> ), 32.07 (CH <sub>2</sub> -C=C(Me) <sub>2</sub> ), 31.4 (CH <sub>2</sub> CH <sub>2</sub> CH <sub>3</sub> ), 28.4 (CH <sub>2</sub> CH <sub>2</sub> CH <sub>2</sub> CH <sub>3</sub> ), 23.7 (CH <sub>3</sub> CO), 22.6, 22.1 (CH <sub>2</sub> CH <sub>3</sub> , CH <sub>2</sub> CH <sub>2</sub> CO), 20.3 (C=C(CH <sub>3</sub> ) <sub>2</sub> ), 20.2 (C=C(CH <sub>3</sub> ) <sub>2</sub> ), 14.1 (CH <sub>2</sub> CH <sub>3</sub> ). |
| IR v (cm <sup>-1</sup> ) (CCl <sub>4</sub> )                    | 1716 (C=O).                                                                                                                                                                                                                                                                                                                                                                                                                                                                                                                                                                                             |
| HRMS (EI+)                                                      | calcd for C <sub>15</sub> H <sub>26</sub> O <sub>2</sub> 238.1933, found: 238.1928.                                                                                                                                                                                                                                                                                                                                                                                                                                                                                                                     |

**7-Cyclopentyl-8-methyl-non-7-ene-2,3-dione**

**11g**

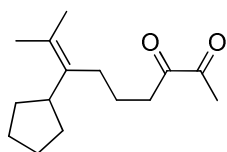

$C_{15}H_{24}O_2$   
 $M = 236.35 \text{ g}\cdot\text{mol}^{-1}$   
Yellow oil

**Reaction:** Following general procedure E, the reaction was carried out using xanthate **10g** (180 mg, 0.5 mmol).

**Purification:** Column chromatography, elution with petroleum ether/ethyl acetate (98/2).

**Yield:** 64 %

**RMN  $^1\text{H}$**  ( $\delta$ , ppm) (CDCl<sub>3</sub>, 400 MHz) 2.78 – 2.87 (m, 1H, CH(CH<sub>2</sub>)<sub>4</sub>), 2.75 (t, J=7.2Hz, 2H, CH<sub>2</sub>CO), 2.34 (s, 3H, CH<sub>3</sub>CO), 1.90 – 1.96 (m, 2H, CH<sub>2</sub>CH<sub>2</sub>C=C), 1.673 (s, 3H, CH<sub>3</sub>C=C), 1.668 (s, 3H, CH<sub>3</sub>C=C), 1.50 – 1.70 (m, 8H, CH<sub>2</sub>CH<sub>2</sub>C=C, CH(CH<sub>2</sub>)<sub>4</sub>), 1.22 – 1.34 (m, 2H, CH(CH<sub>2</sub>)<sub>4</sub>).

**RMN  $^{13}\text{C}$**  ( $\delta$ , ppm) (CDCl<sub>3</sub>, 100.6 MHz) 199.4 (C=O), 197.6 (C=O), 133.5, 125.8 (C<sub>q</sub>=C<sub>q</sub>(Me)<sub>2</sub>), 42.9 (CH(CH<sub>2</sub>)<sub>4</sub>), 36.0 (CH<sub>2</sub>CO), 30.8 (CH(CH<sub>2</sub>)<sub>4</sub>), 28.1 (CH<sub>2</sub>-C=C(Me)<sub>2</sub>), 25.1 (CH(CH<sub>2</sub>)<sub>4</sub>), 23.8 (CH<sub>3</sub>CO), 23.7 (CH<sub>2</sub>CH<sub>2</sub>CO), 20.9 (C=C(CH<sub>3</sub>)<sub>2</sub>), 20.0 (C=C(CH<sub>3</sub>)<sub>2</sub>).

**IR  $\nu$**  (cm<sup>-1</sup>) (CCl<sub>4</sub>) 1716 (C=O).

**HRMS** (EI+) calcd for C<sub>15</sub>H<sub>24</sub>O<sub>2</sub> 236.1776, found: 236.1777.

**Dithiocarbonic acid [3-(-3-acetyl-3-hydroxy-2,2-dimethyl-cyclohexylidene)-propyl] ester ethyl ester**

**17**

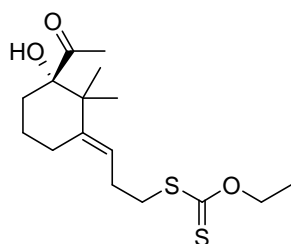

$C_{16}H_{26}O_3S_2$   
 $M = 330.51 \text{ g}\cdot\text{mol}^{-1}$   
Colorless oil

**Reaction:** A solution of xanthate **10h** (142 mg, 0.43 mmol) in **chlorobenzene** (1 mL), was refluxed under nitrogen for 15 minutes. **Dilauroyl peroxide** was then added by portion of 5 to 10% every 20 minutes. After addition of 45 % of DLP, the solvent was then removed *in vacuo*, giving crude compound **17**.

|                                                                 |                                                                                                                                                                                                                                                                                                                                                                                                                                                                                                                                                                                                                                                                                                                                                                       |
|-----------------------------------------------------------------|-----------------------------------------------------------------------------------------------------------------------------------------------------------------------------------------------------------------------------------------------------------------------------------------------------------------------------------------------------------------------------------------------------------------------------------------------------------------------------------------------------------------------------------------------------------------------------------------------------------------------------------------------------------------------------------------------------------------------------------------------------------------------|
| Purification:                                                   | Column chromatography, elution with petroleum ether/ethyl acetate (9/1).                                                                                                                                                                                                                                                                                                                                                                                                                                                                                                                                                                                                                                                                                              |
| Yield:                                                          | 45 %                                                                                                                                                                                                                                                                                                                                                                                                                                                                                                                                                                                                                                                                                                                                                                  |
| RMN <sup>1</sup> H (δ, ppm)<br>(CDCl <sub>3</sub> , 400 MHz)    | 5.27 (t, J=7.3Hz, 1H, C=CH), 4.65 (q, J=7.1 Hz, 2H, OCH <sub>2</sub> ), 3.10 – 3.25 (m, 2H, SCH <sub>2</sub> ), 3.04 (s, 1H, OH), 2.44 – 2.58 (m, 2H, C=CHCH <sub>2</sub> ), 2.35 – 2.44 (m, 1H, CH <sub>2</sub> CH <sub>2</sub> CH <sub>2</sub> ), 2.25 (s, 3H, CH <sub>3</sub> CO), 2.17 – 2.25 (m, 1H, CH <sub>2</sub> CH <sub>2</sub> CH <sub>2</sub> ), 2.11 (ddd, J=4.7Hz, J=10.8Hz, J=13.3Hz, 1H, CH <sub>2</sub> CH <sub>2</sub> CH <sub>2</sub> ), 1.67 – 1.77 (m, 1H, CH <sub>2</sub> CH <sub>2</sub> CH <sub>2</sub> ), 1.52 – 1.62 (m, 2H, CH <sub>2</sub> CH <sub>2</sub> CH <sub>2</sub> ), 1.42 (t, J=7.1Hz, 3H, OCH <sub>2</sub> CH <sub>3</sub> ), 1.14 (s, 3H, C(CH <sub>3</sub> ) <sub>2</sub> ), 1.05 (s, 3H, C(CH <sub>3</sub> ) <sub>2</sub> ). |
| RMN <sup>13</sup> C (δ, ppm)<br>(CDCl <sub>3</sub> , 100.6 MHz) | 214.8, 212.8 (C=S, C=O), 145.6 (C <sub>q</sub> =CH), 120.7 (C <sub>q</sub> =CH), 83.6 (COH), 69.9 (OCH <sub>2</sub> ), 44.2 (C(Me) <sub>2</sub> ), 36.0 (SCH <sub>2</sub> ), 30.8 (CH <sub>2</sub> CH <sub>2</sub> CH <sub>2</sub> ), 28.3 (CH <sub>3</sub> CO), 26.6 (C=CH-CH <sub>2</sub> ), 23.8 (C(CH <sub>3</sub> ) <sub>2</sub> ), 23.5 (CH <sub>2</sub> CH <sub>2</sub> CH <sub>2</sub> ), 22.8 (C(CH <sub>3</sub> ) <sub>2</sub> ), 21.8 (CH <sub>2</sub> CH <sub>2</sub> CH <sub>2</sub> ), 13.8 (OCH <sub>2</sub> CH <sub>3</sub> ).                                                                                                                                                                                                                        |
| IR ν (cm <sup>-1</sup> ) (CCl <sub>4</sub> )                    | 3626, 3545 (OH), 1711 (C=O), 1647 (C=C), 1214, 1053 (C=S, C-O).                                                                                                                                                                                                                                                                                                                                                                                                                                                                                                                                                                                                                                                                                                       |
| HRMS (EI+)                                                      | calcd for C <sub>16</sub> H <sub>26</sub> O <sub>3</sub> S <sub>2</sub> 330.1324, found: 330.1323.                                                                                                                                                                                                                                                                                                                                                                                                                                                                                                                                                                                                                                                                    |

## II. Copies of $^1\text{H}$ and $^{13}\text{C}$ NMR Spectra

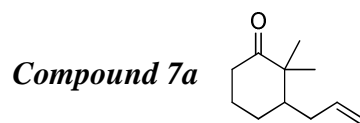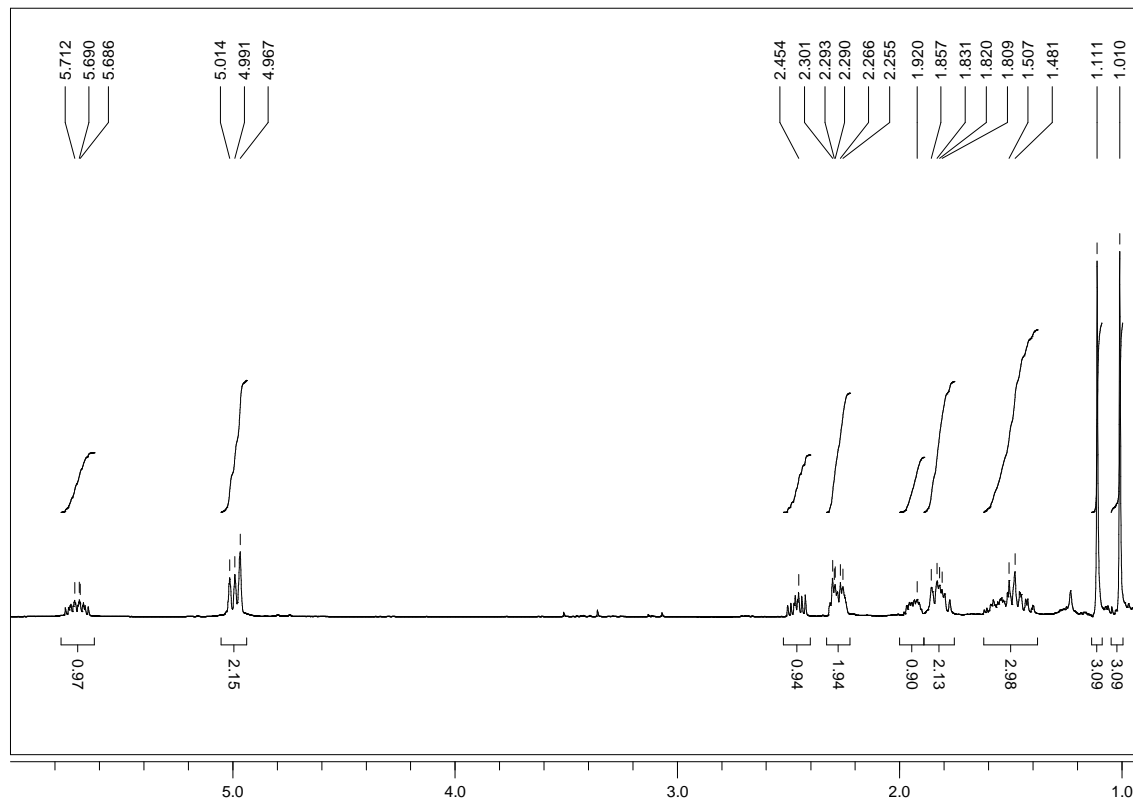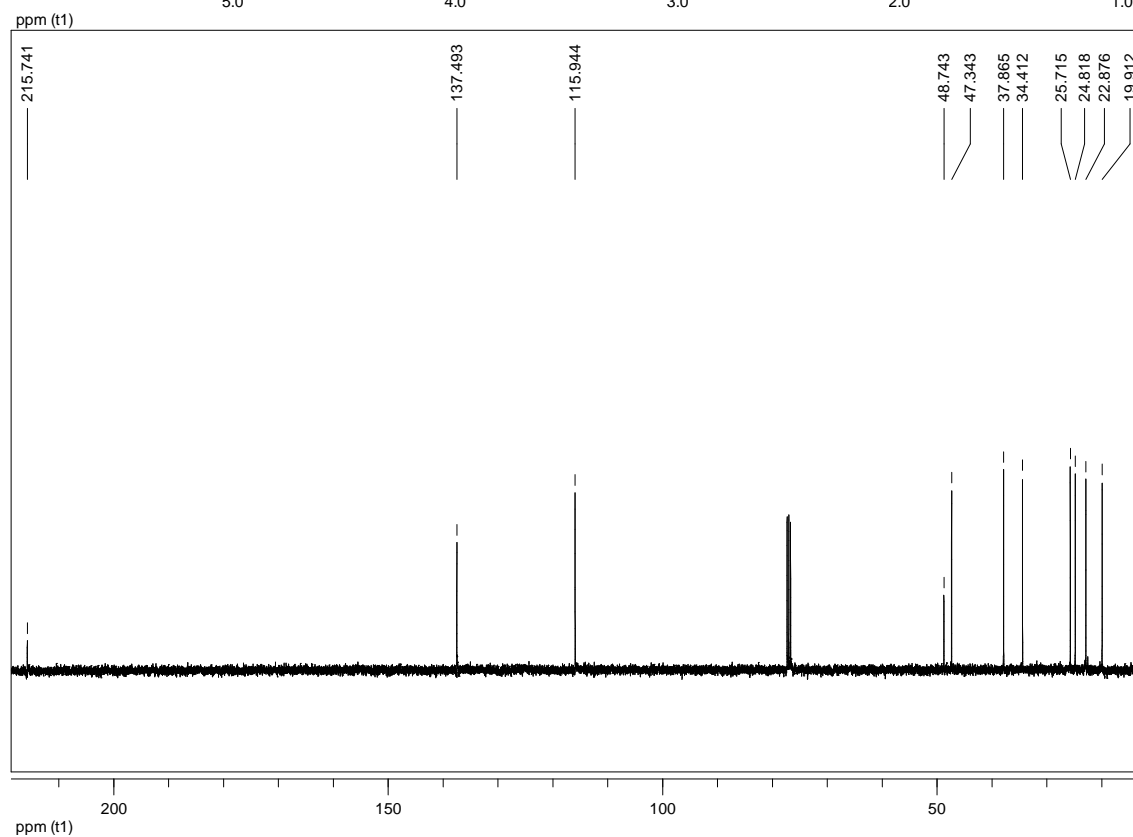

**Compound 7b**

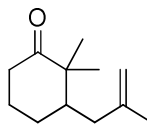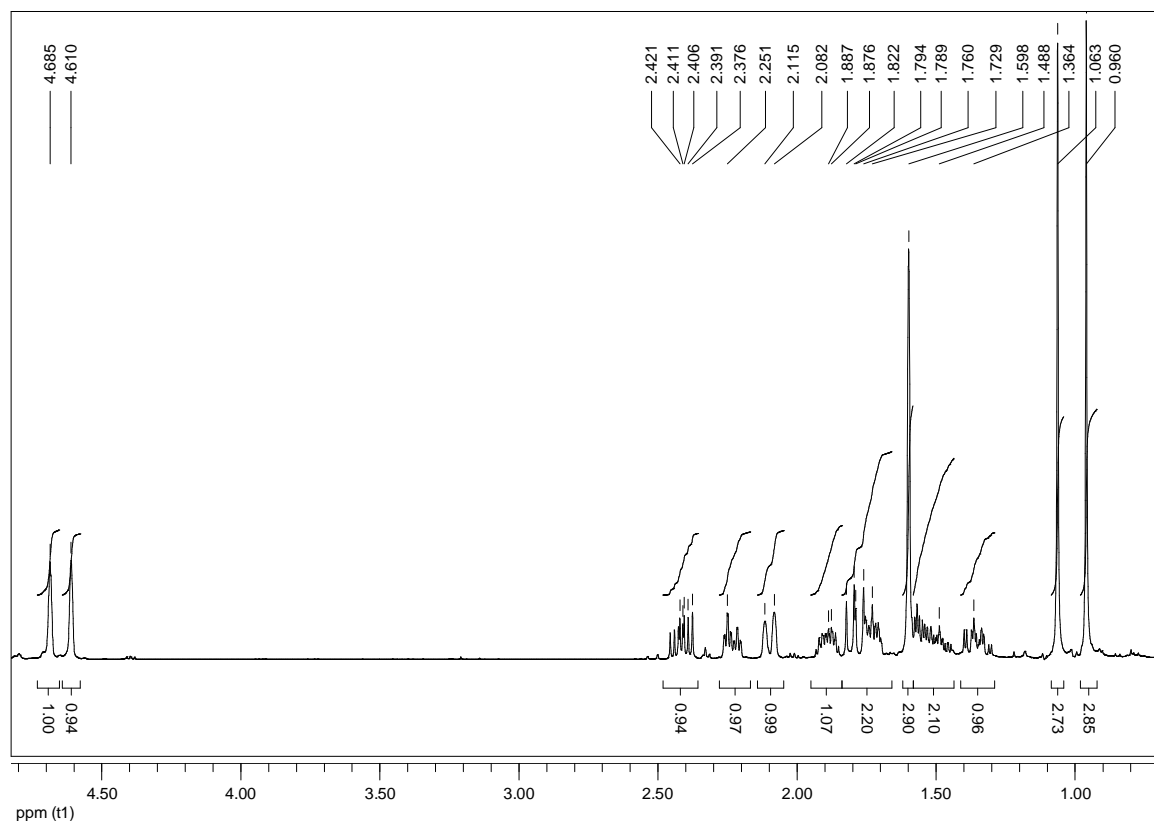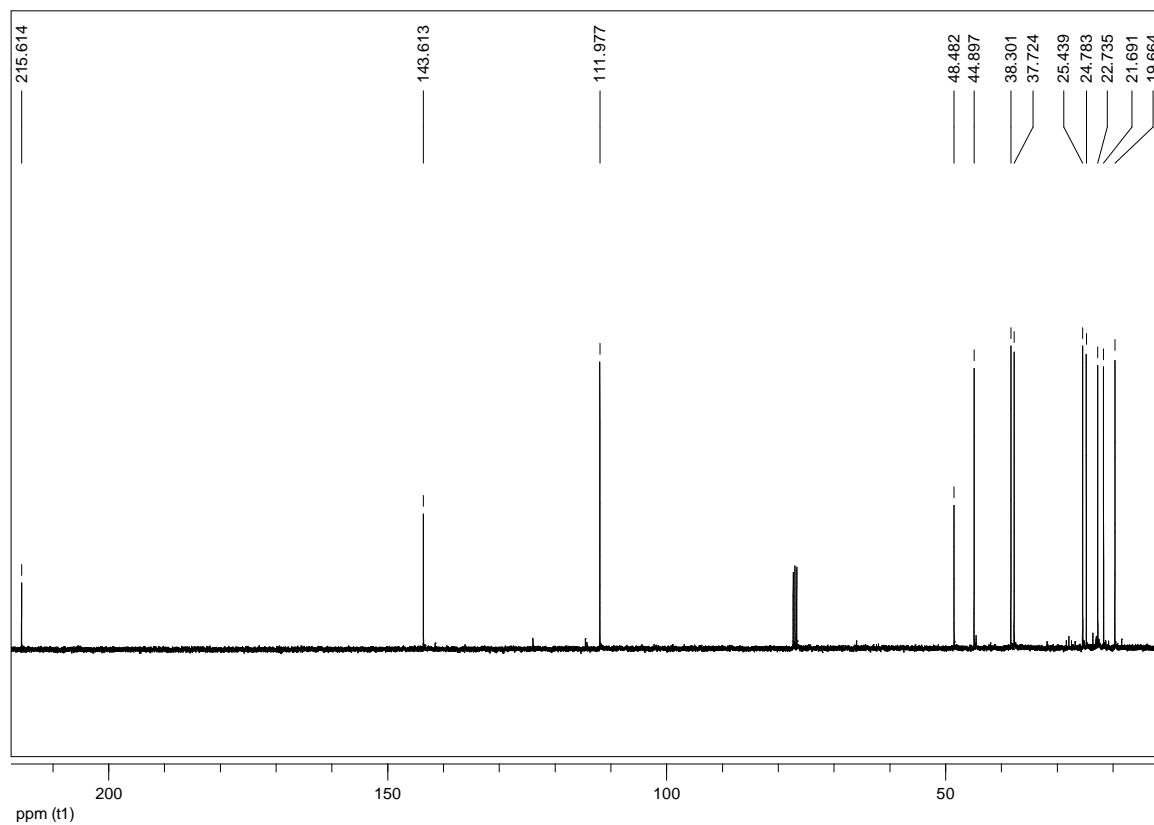

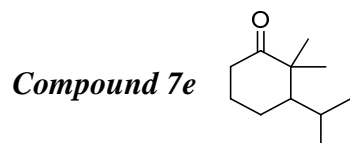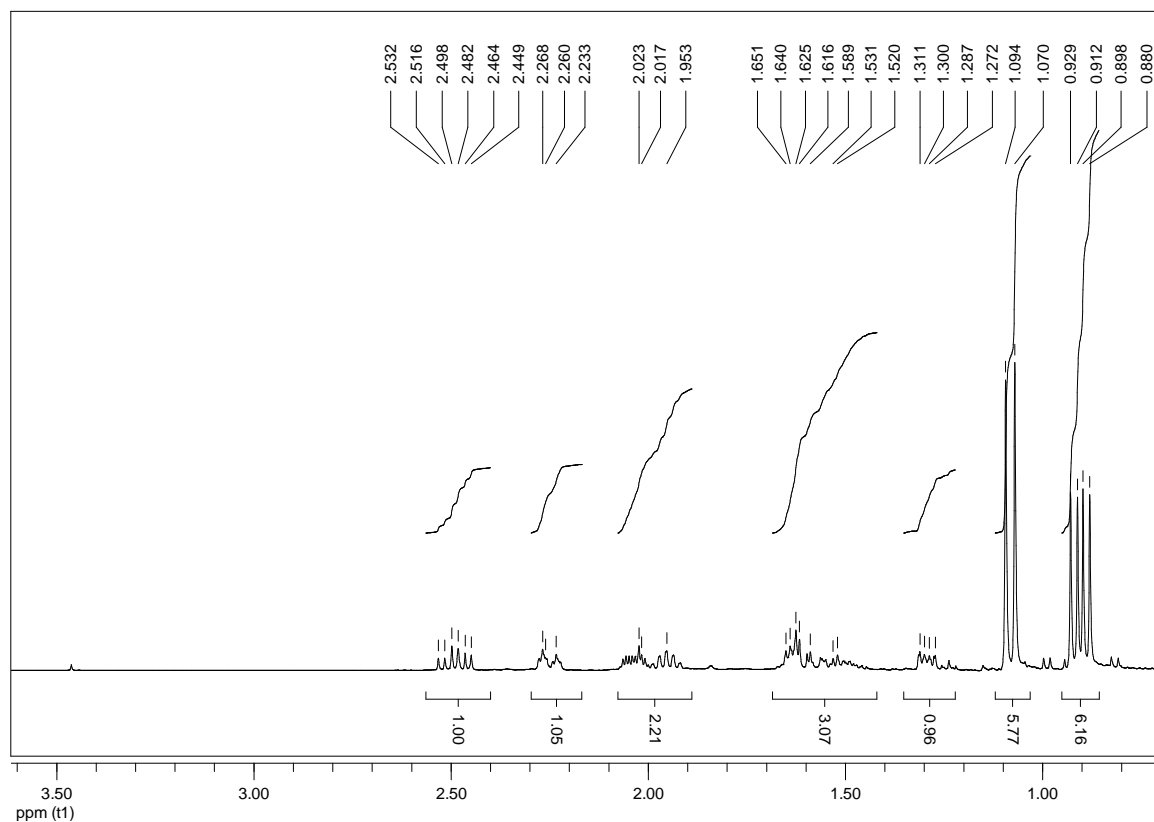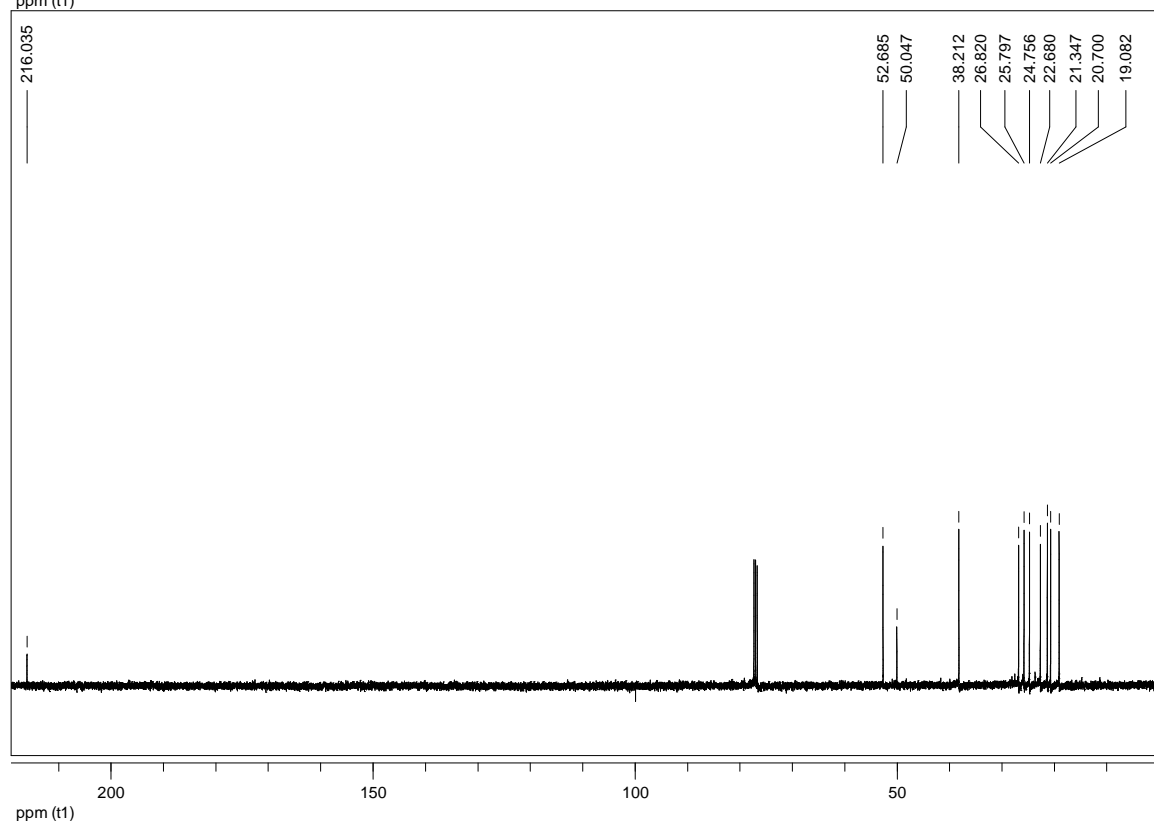

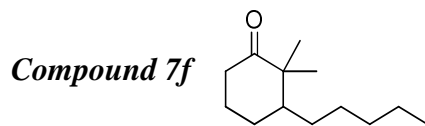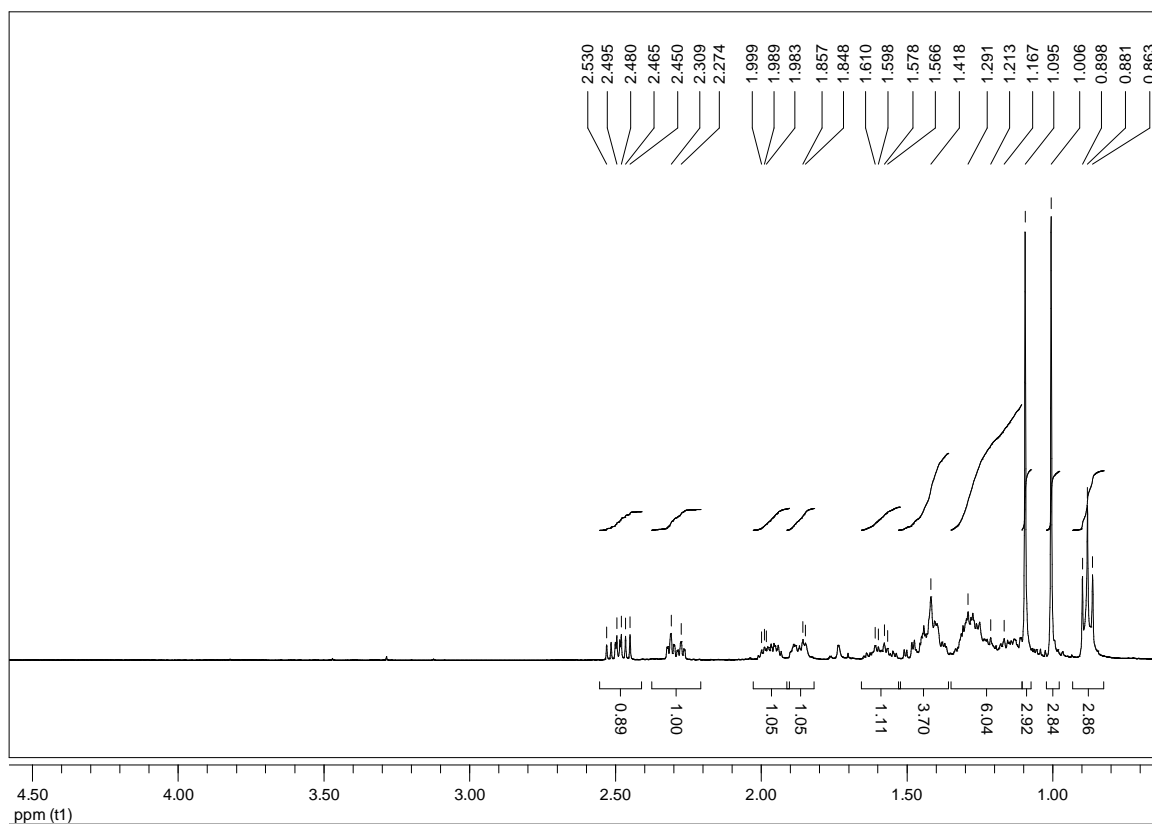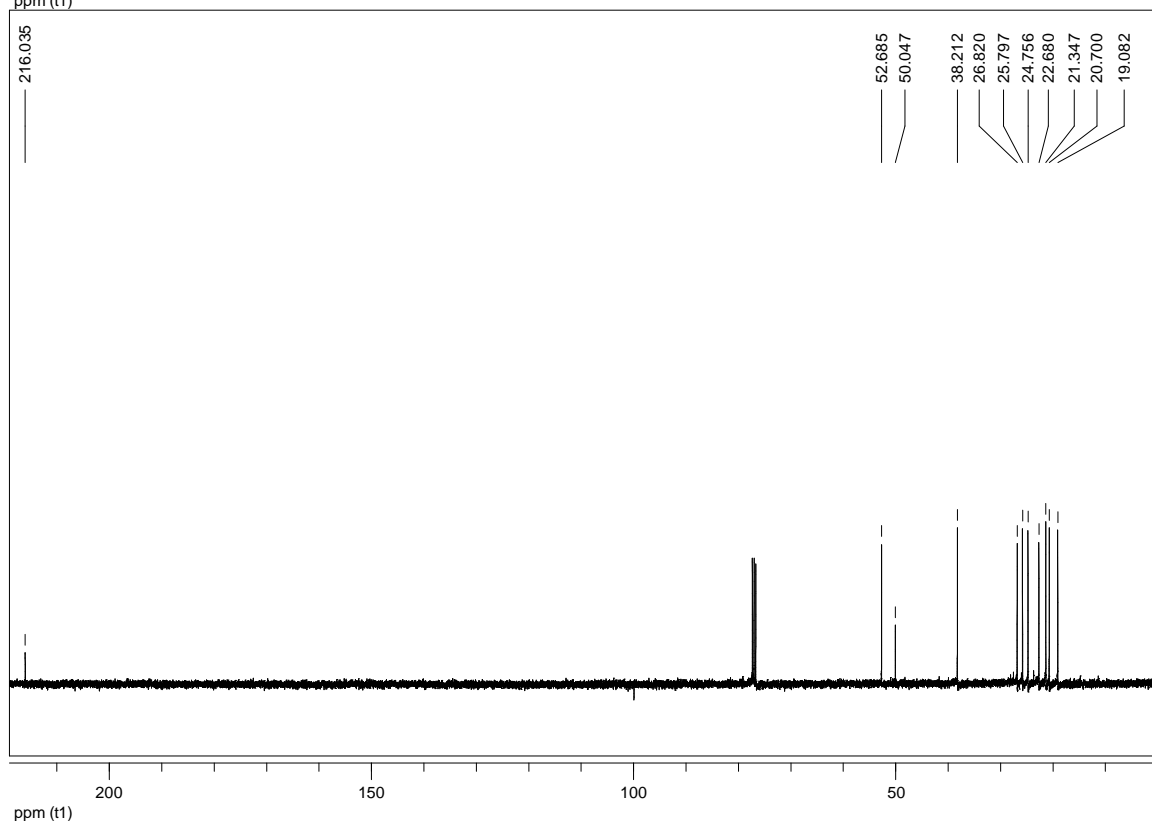



**Compound 7g**

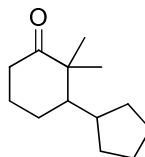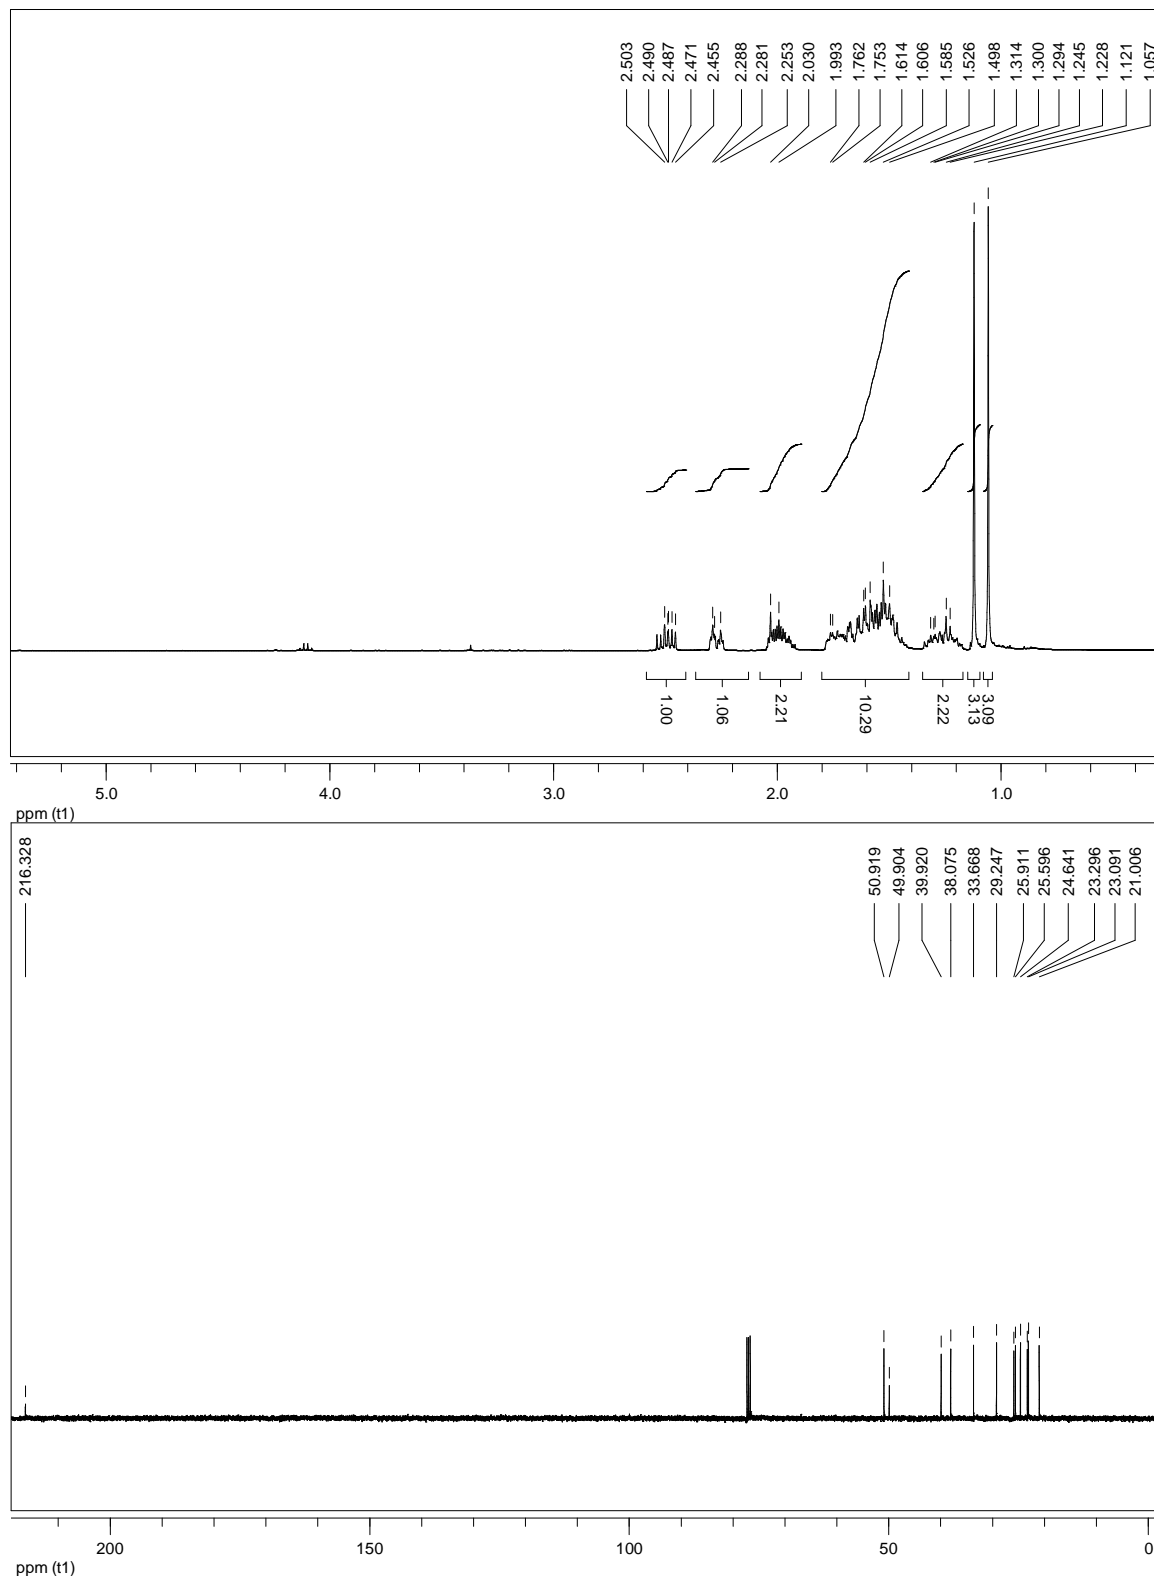

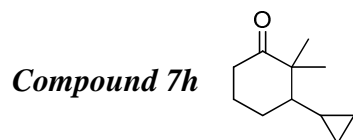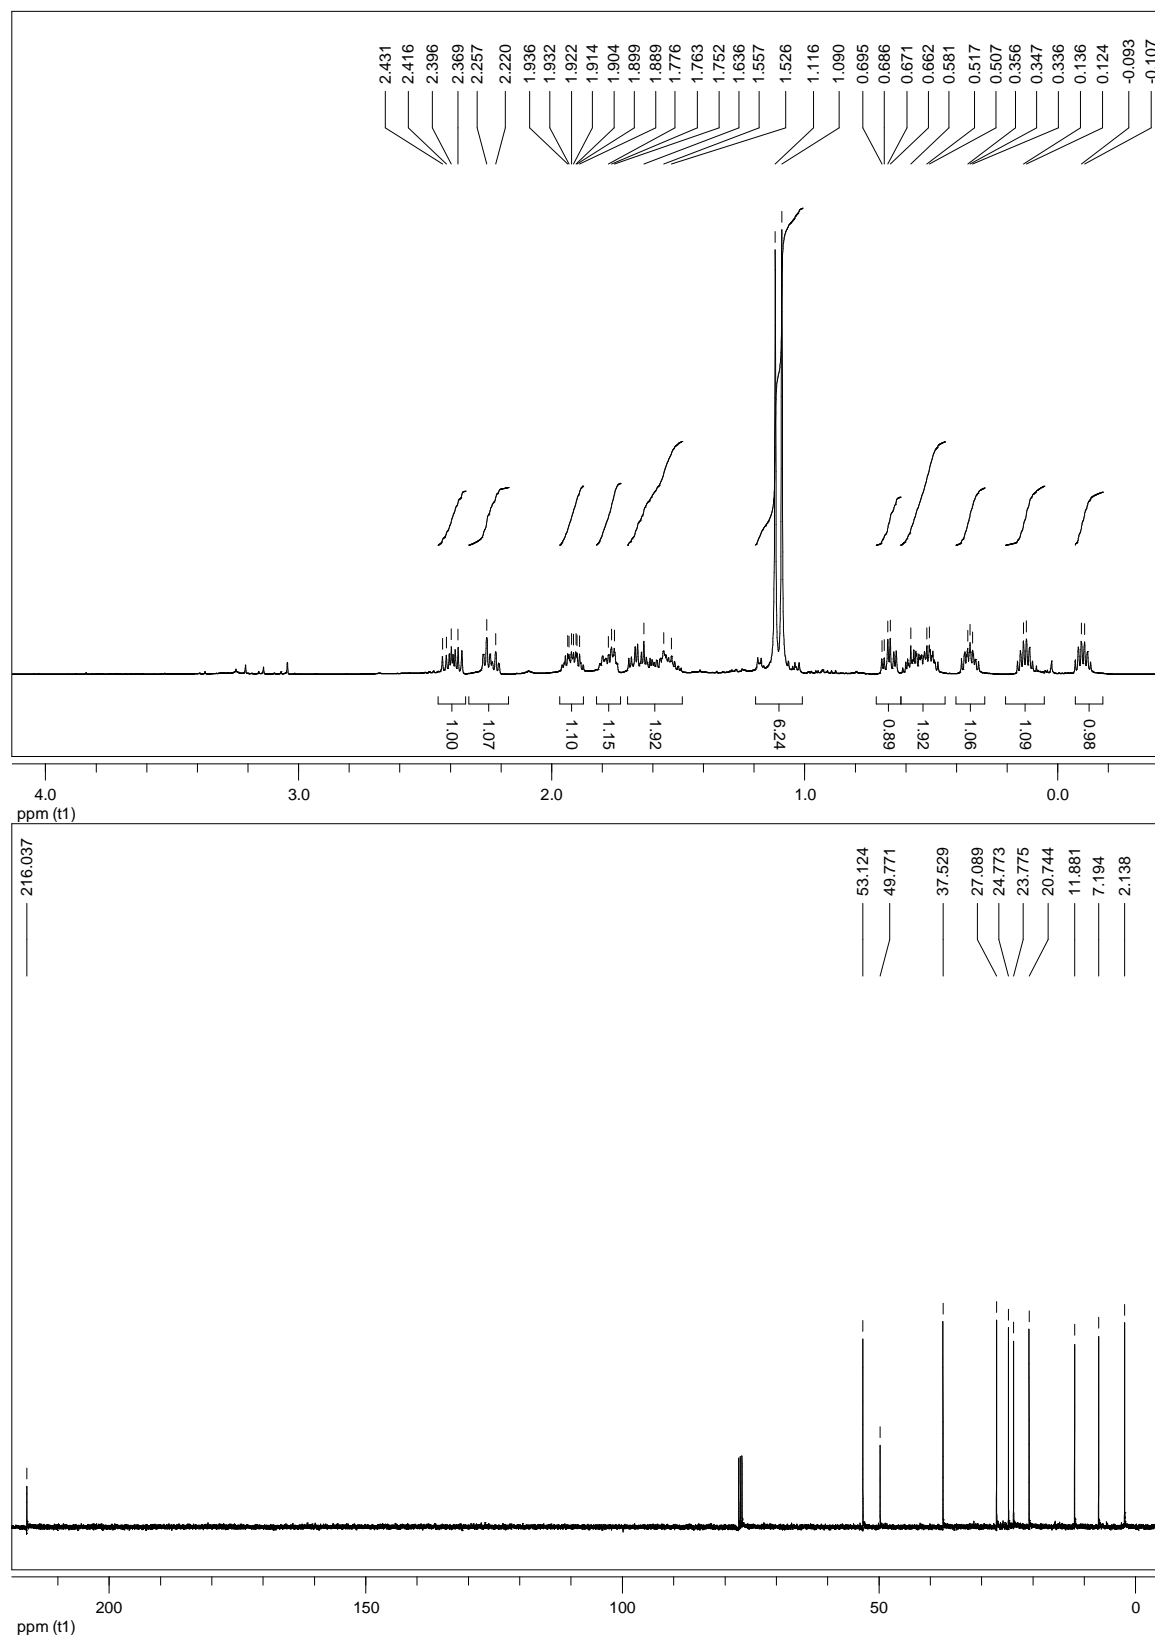

**Compound 10a**

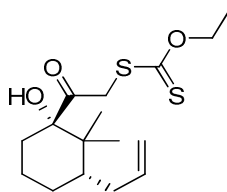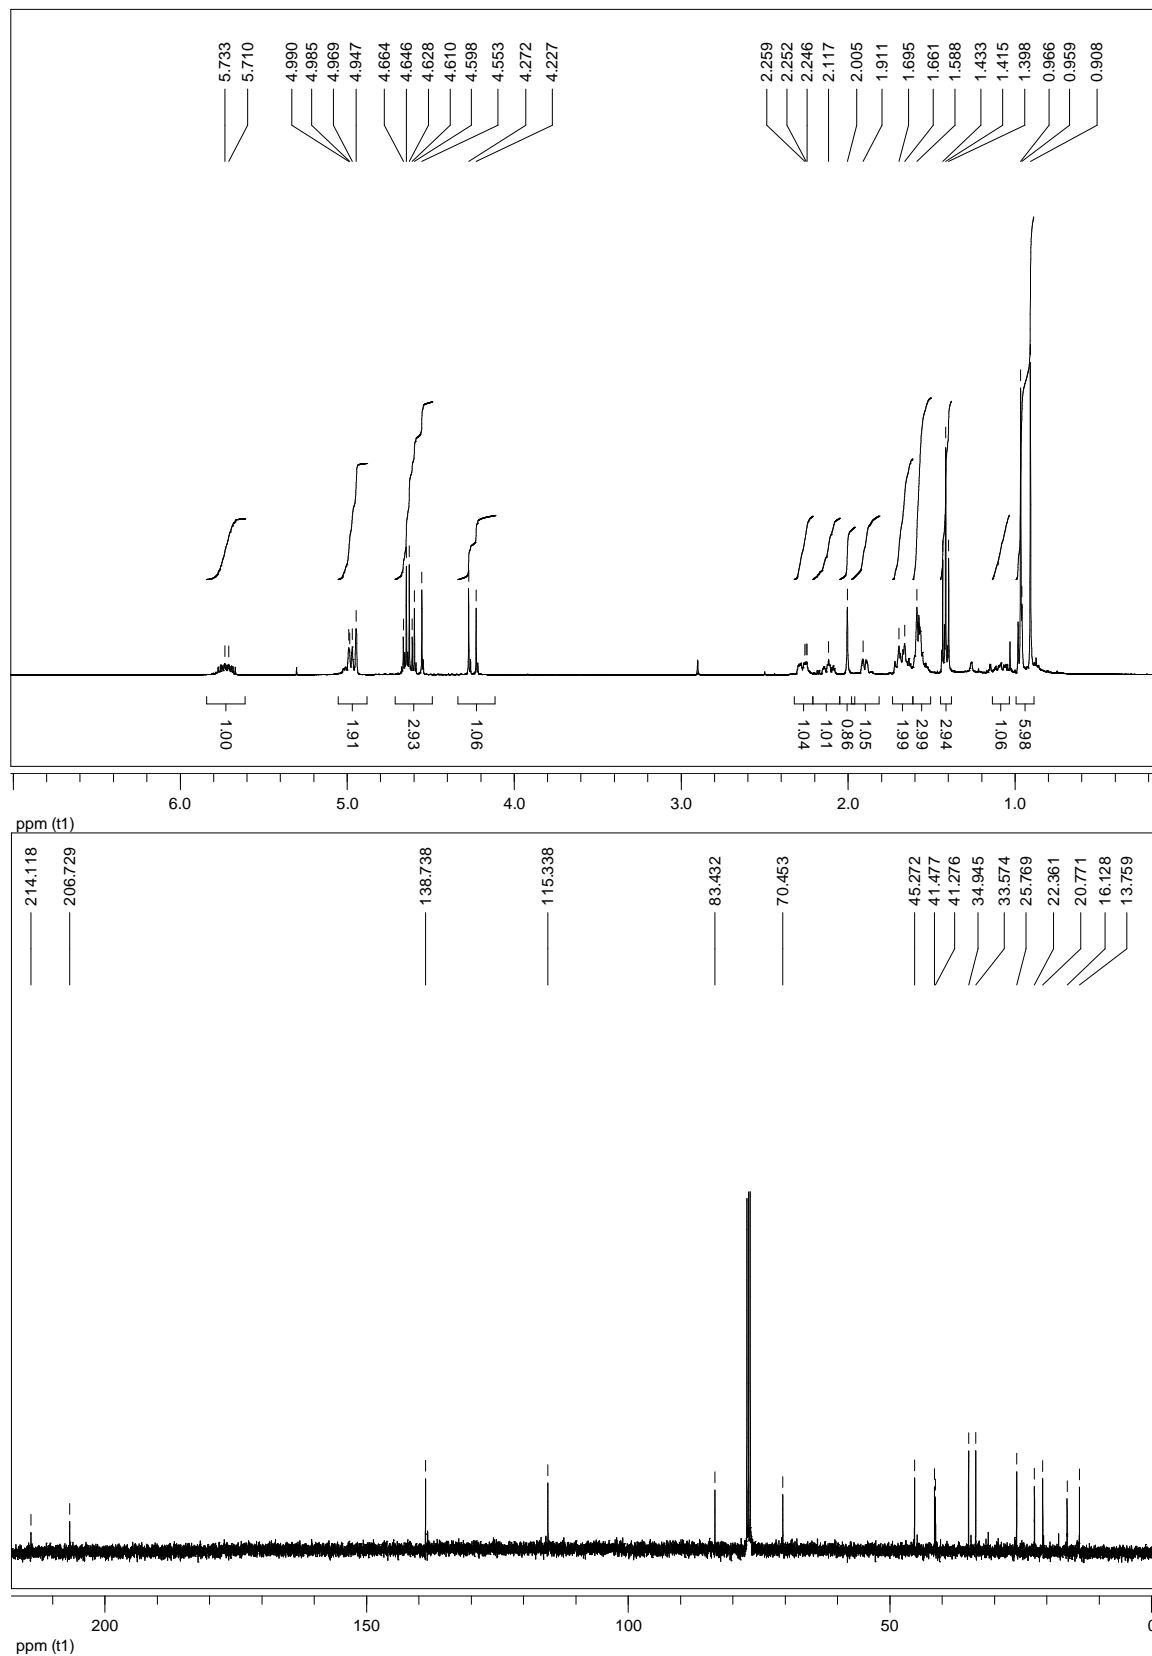

**Compound 10b**

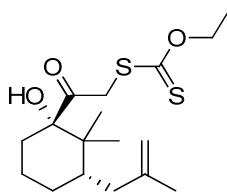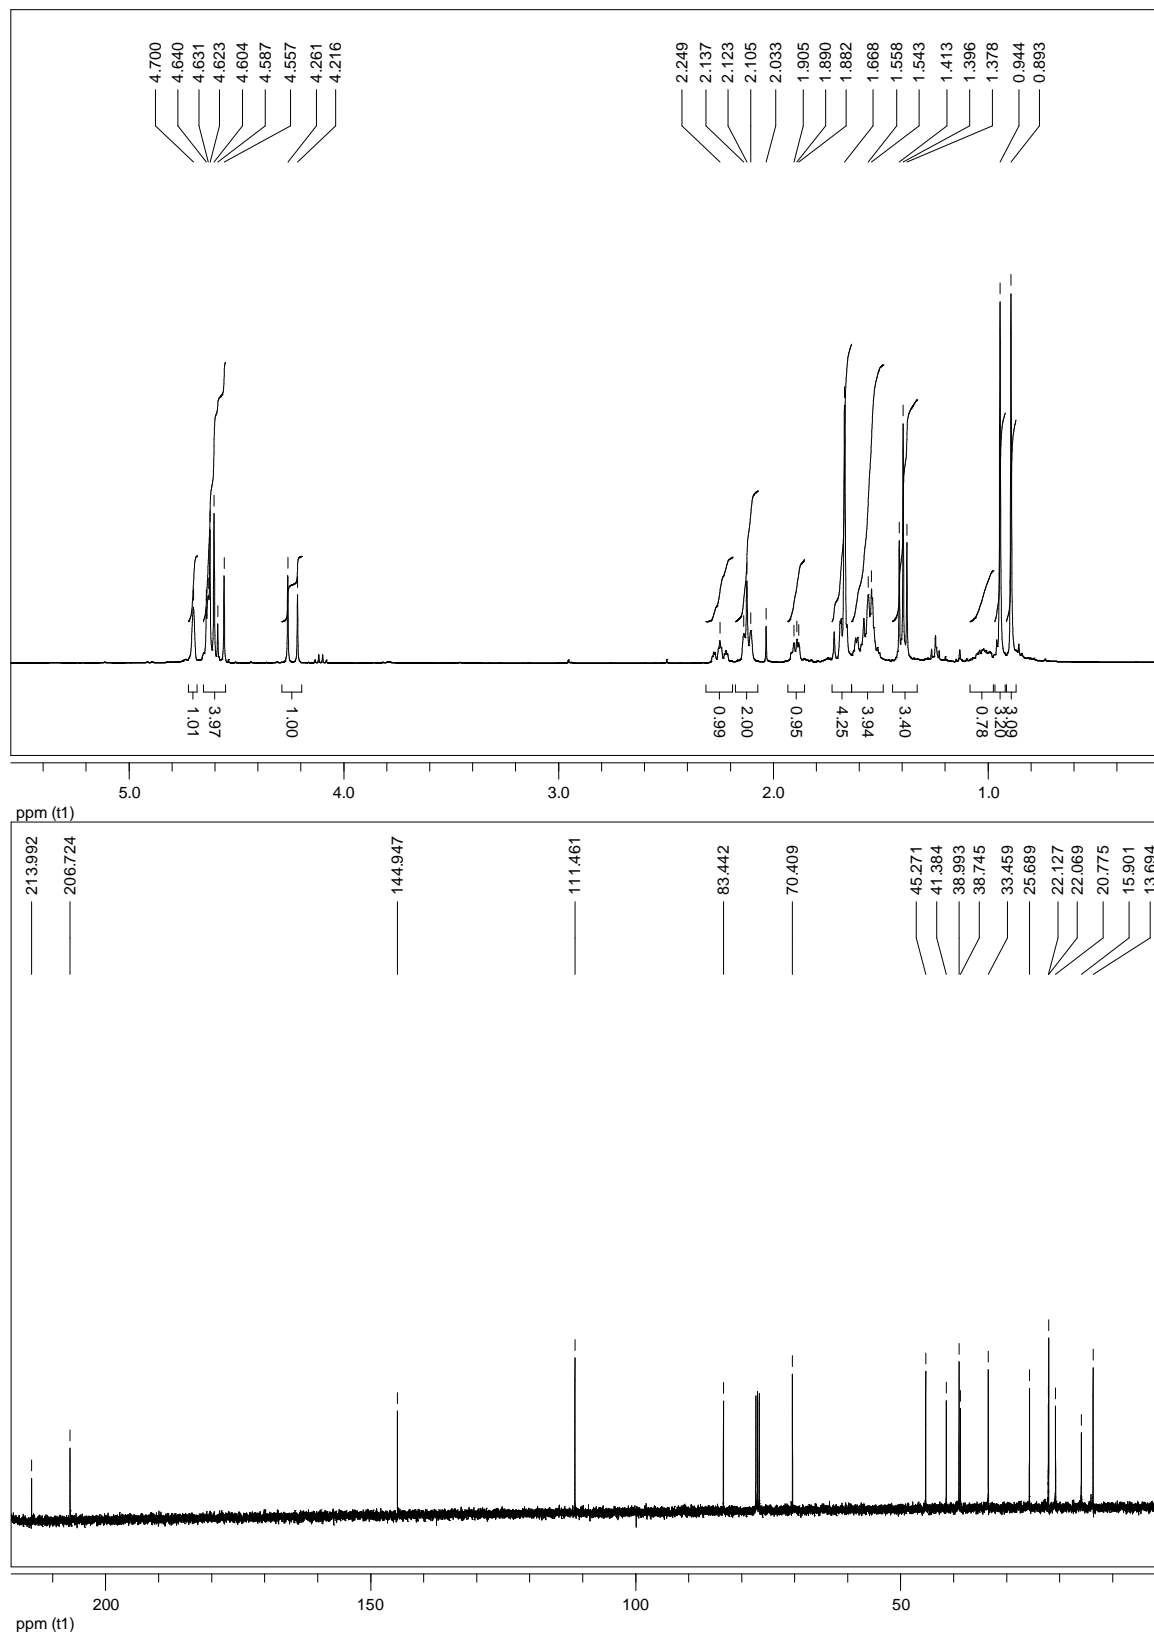

**Compound 10c**

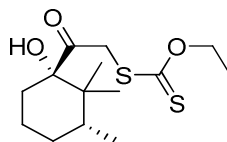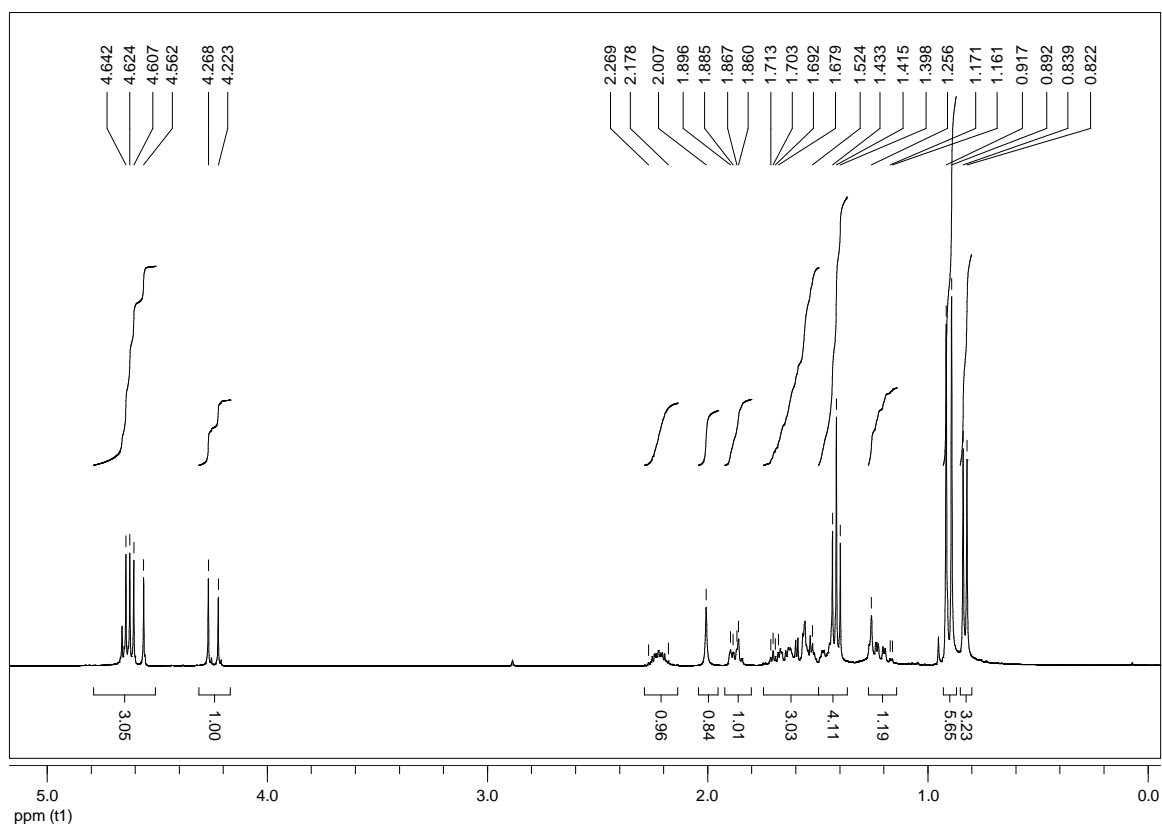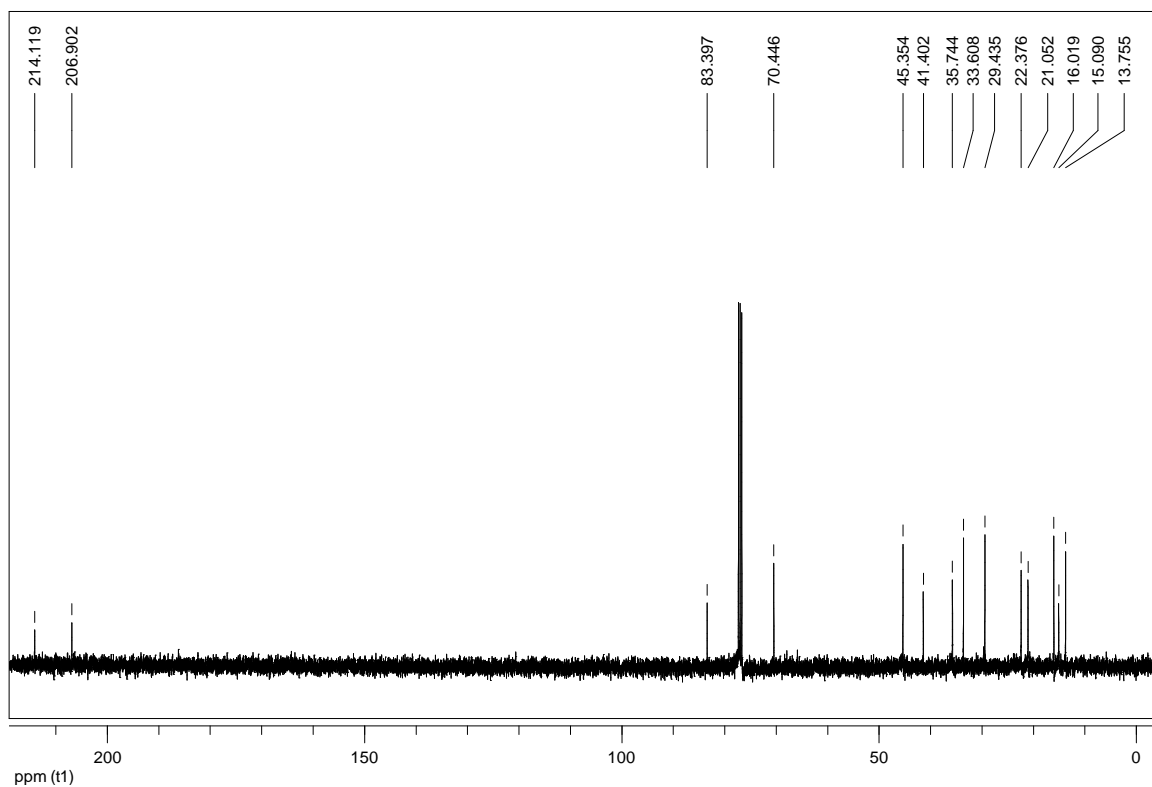

**Compound 10d**

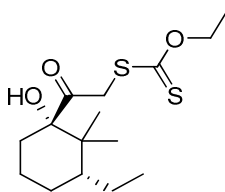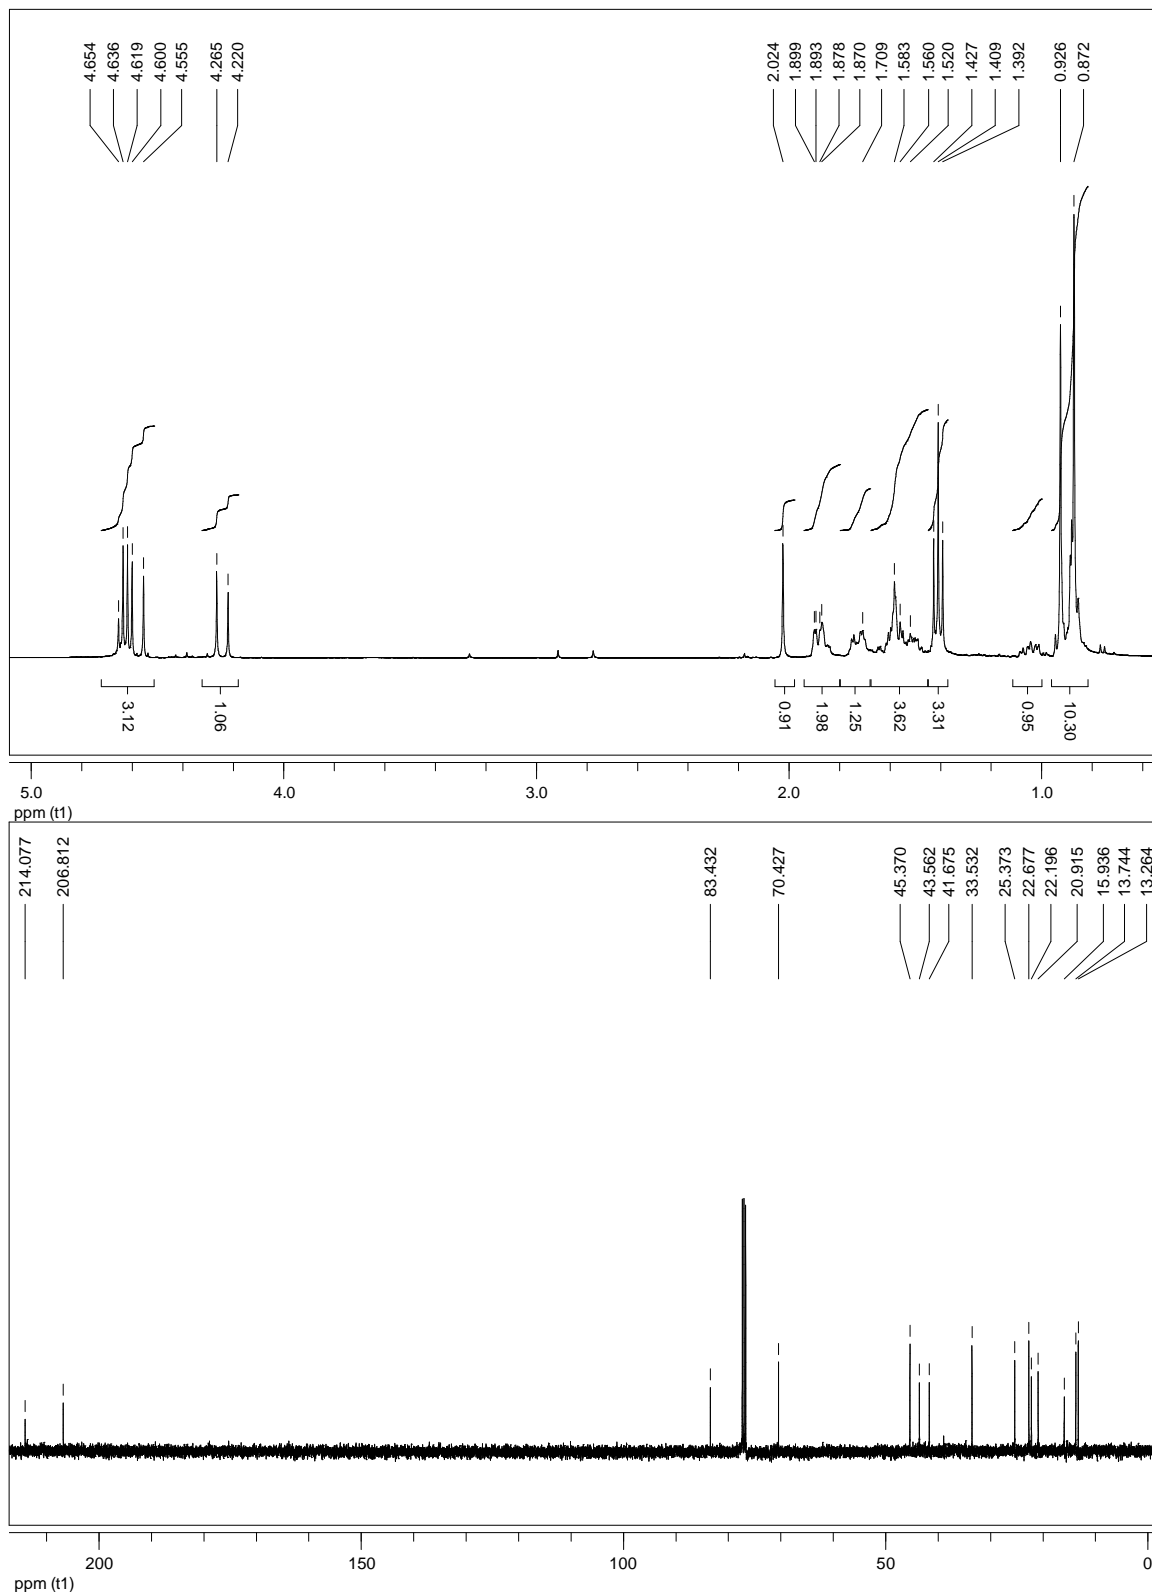

**Compound 10e**

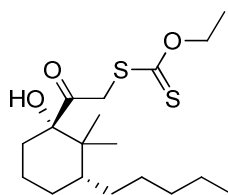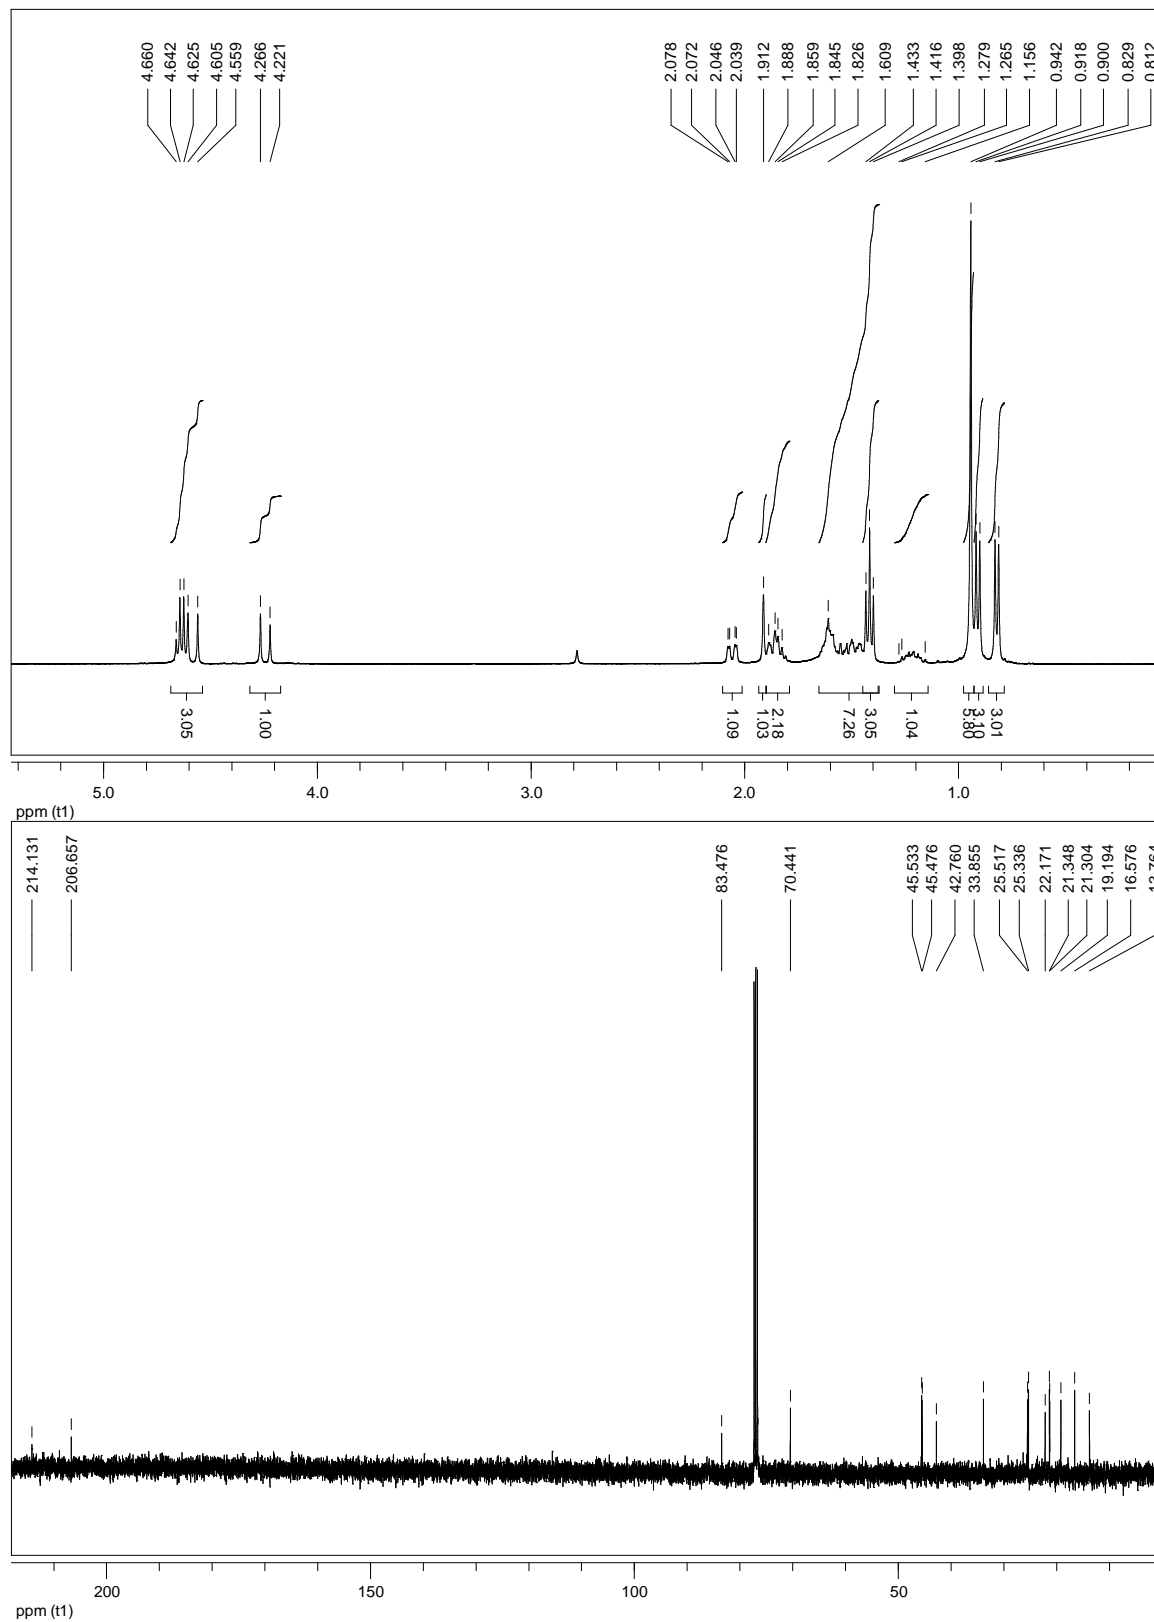

**Compound 10f**

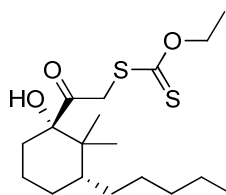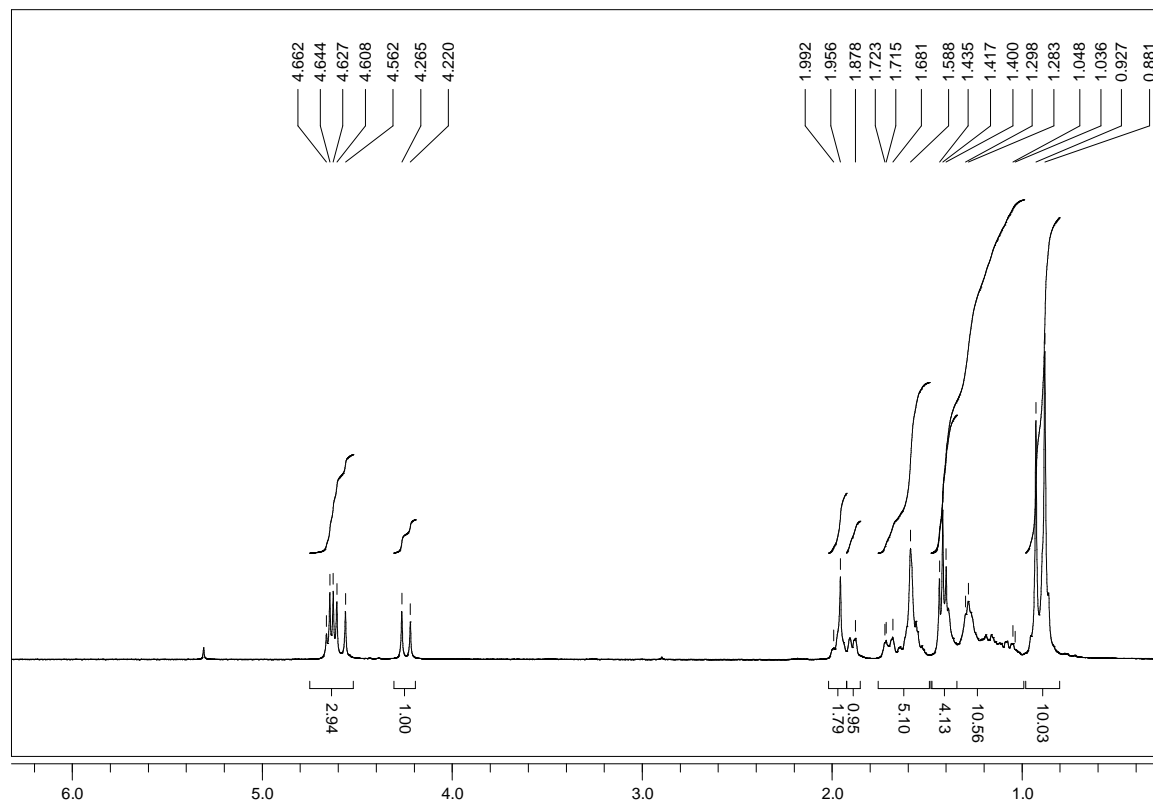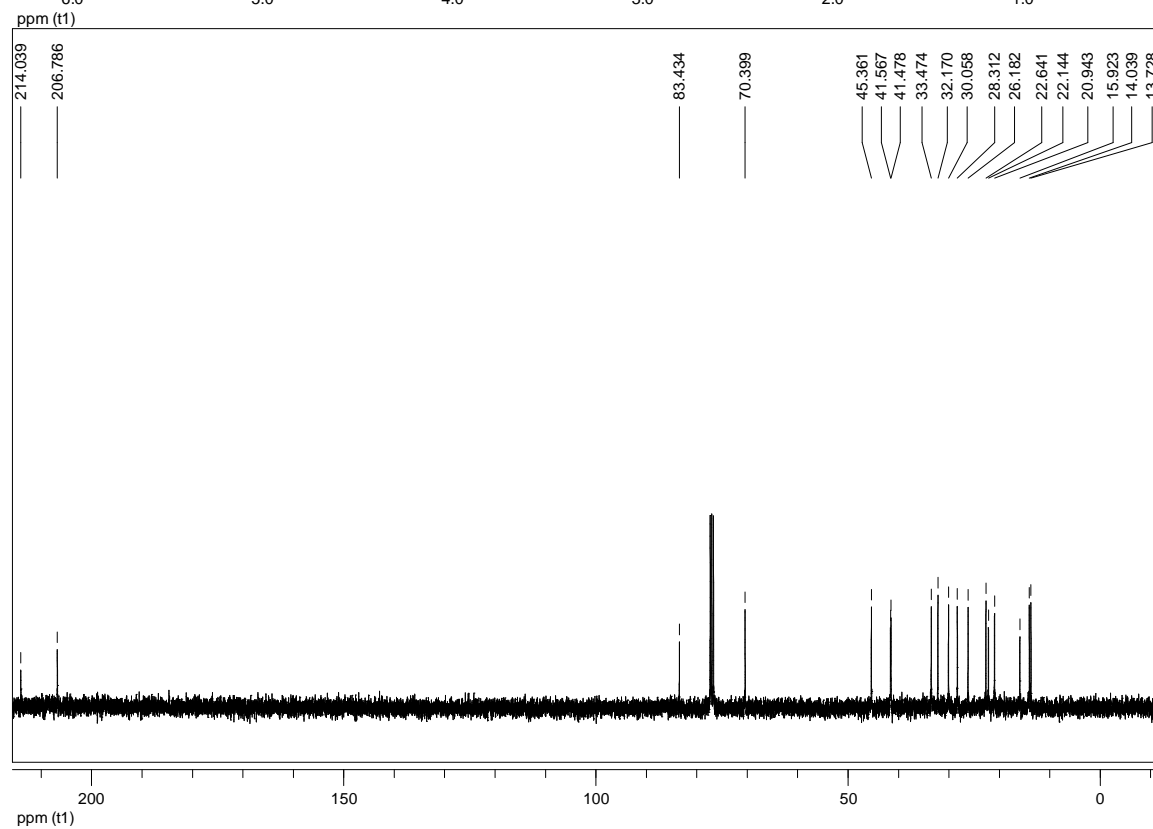



**Compound 10g**

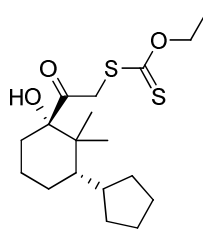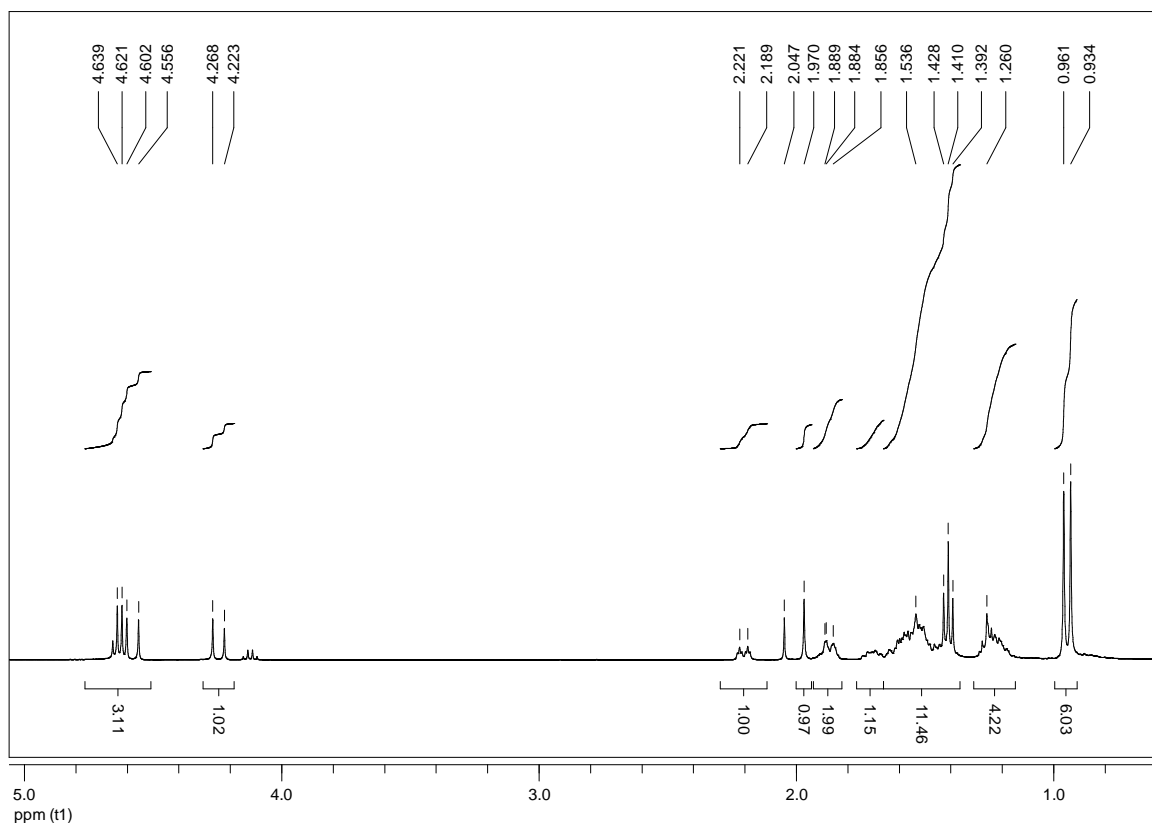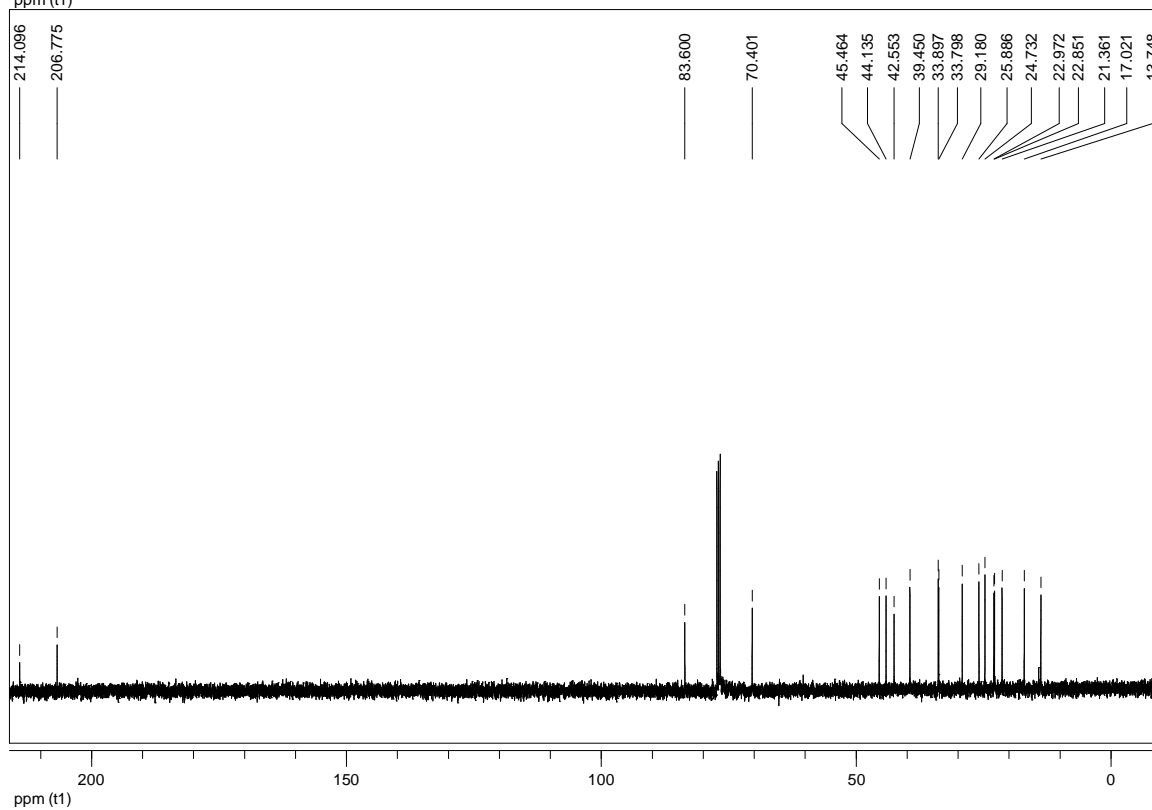

**Compound 10h**

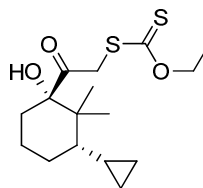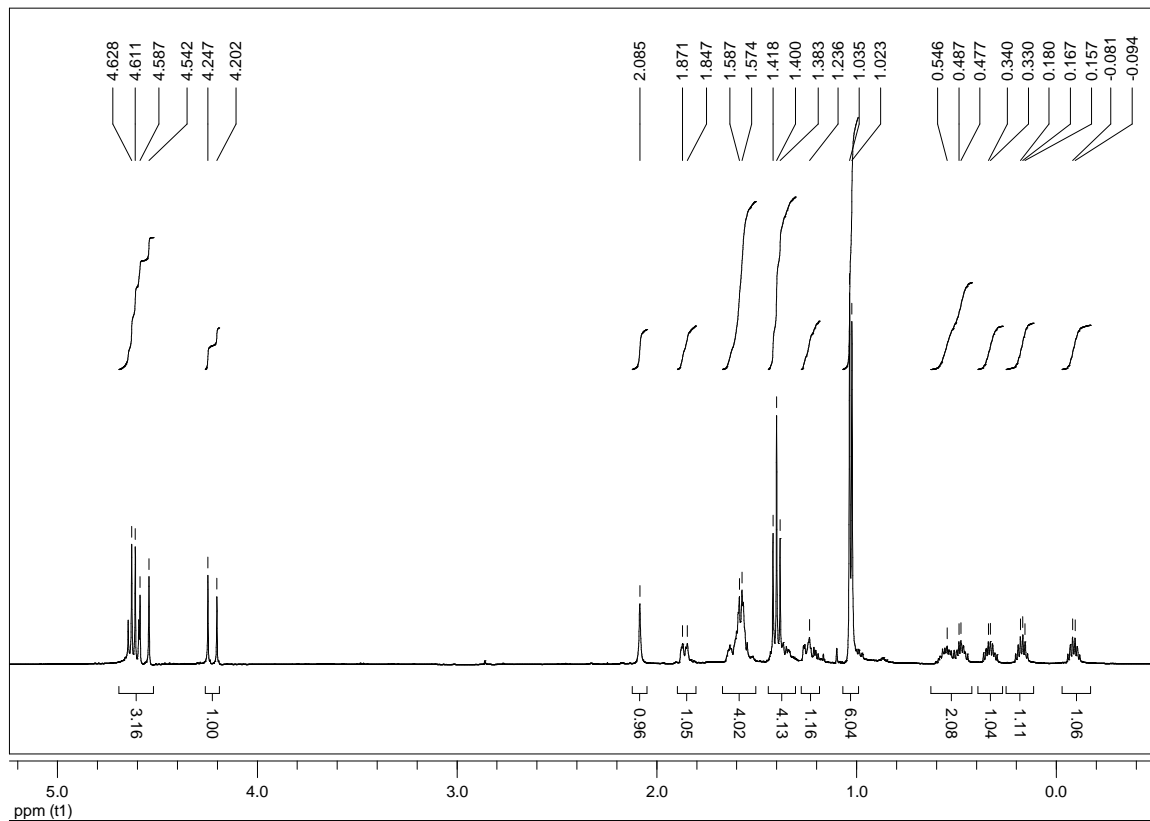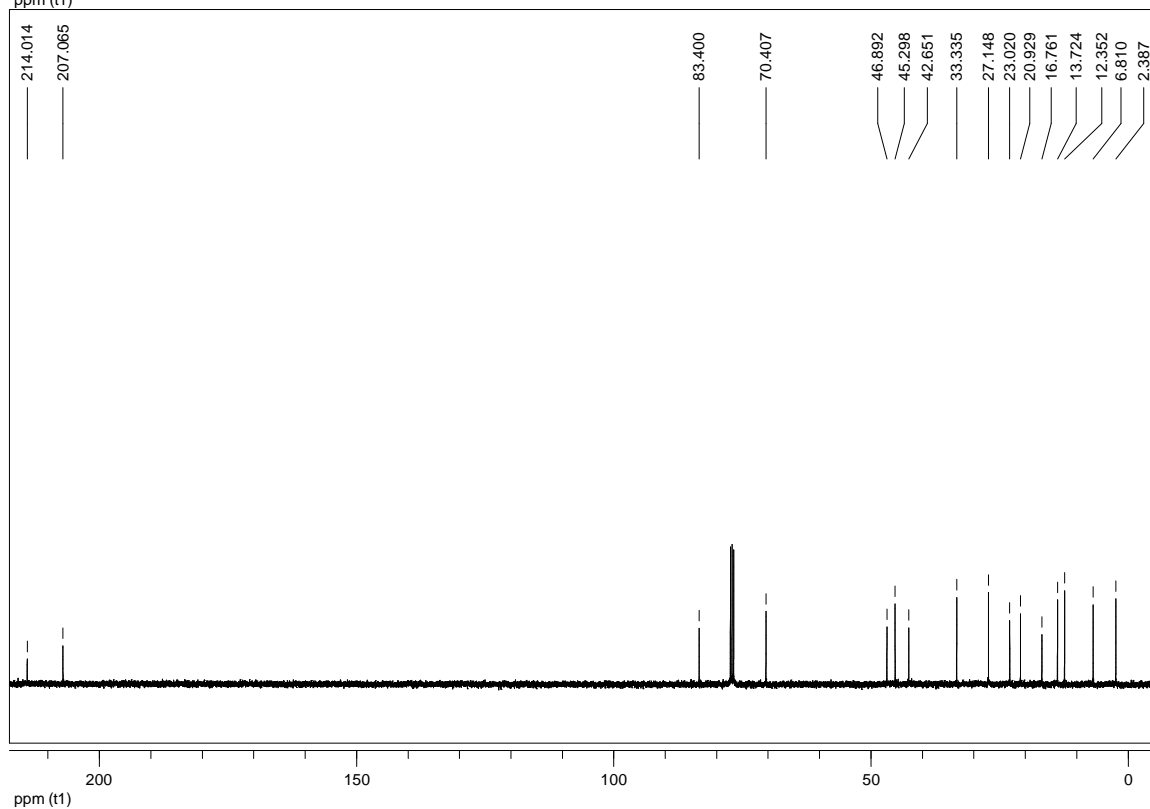

**Compound 11a**

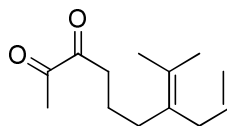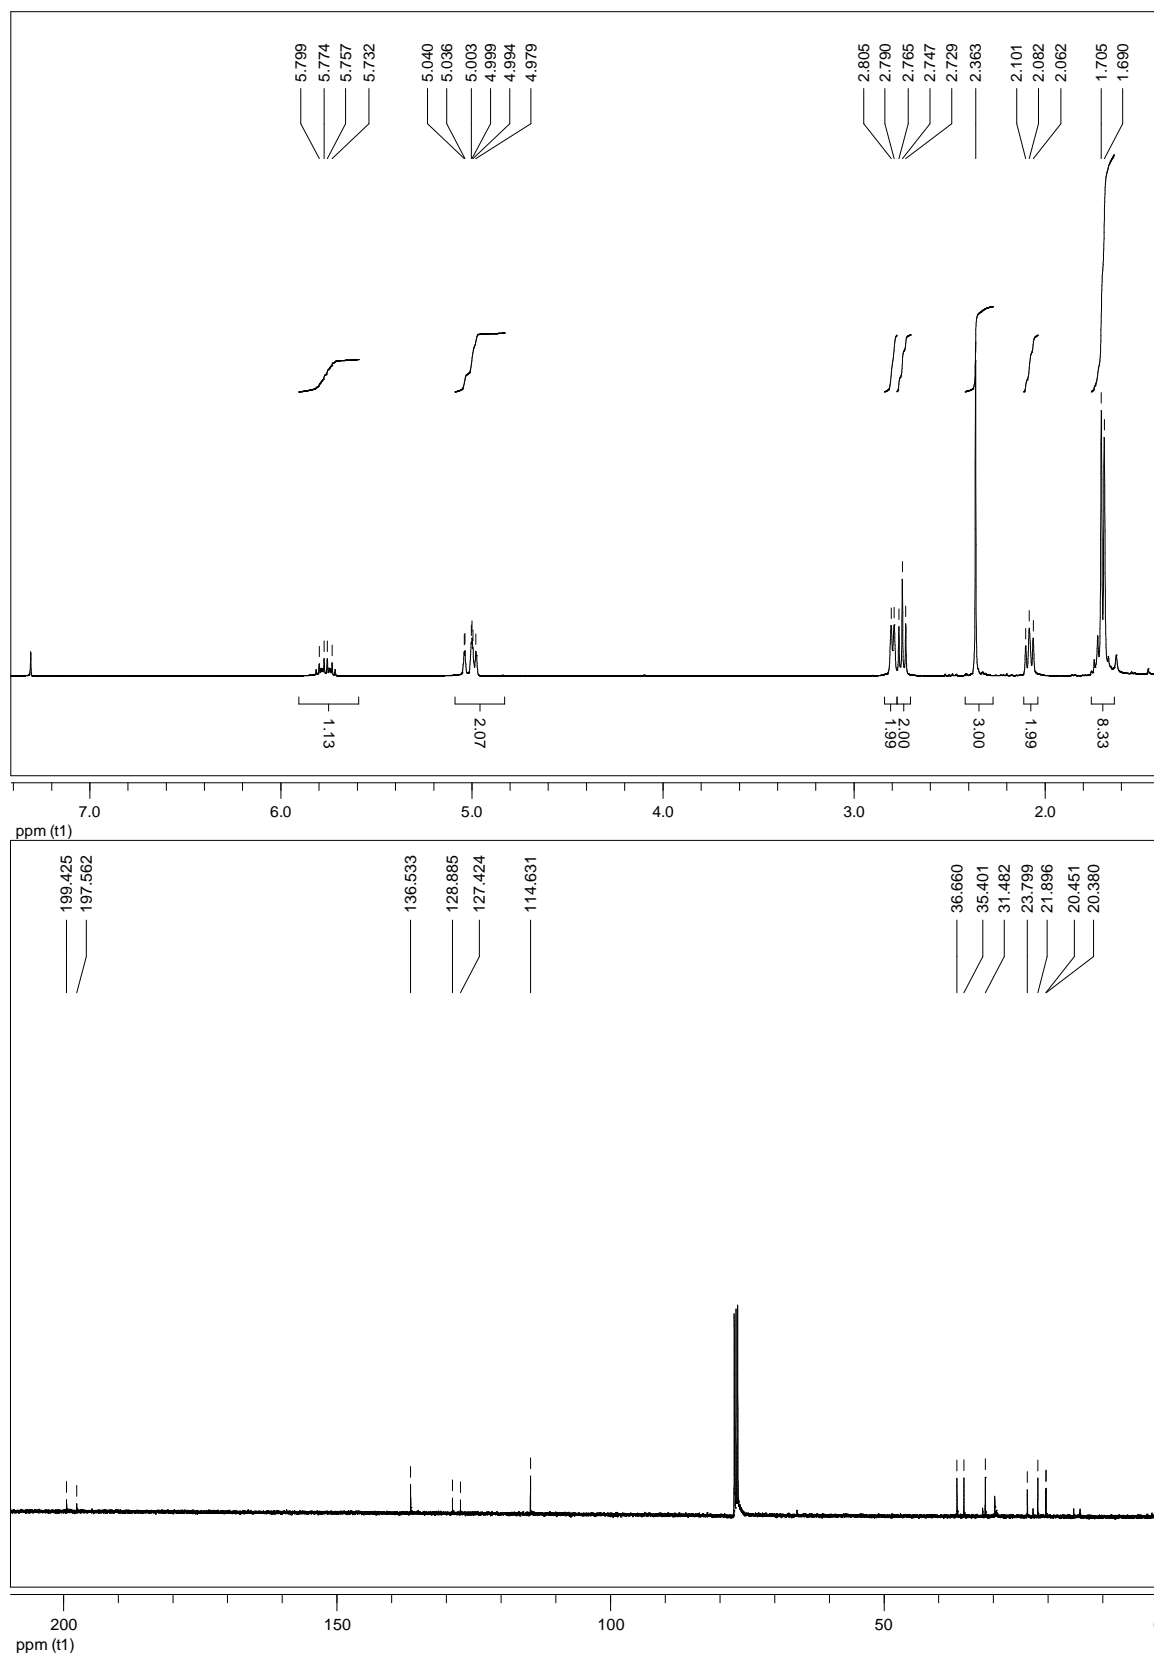

**Compound 11b**

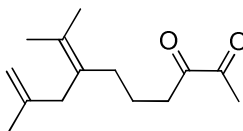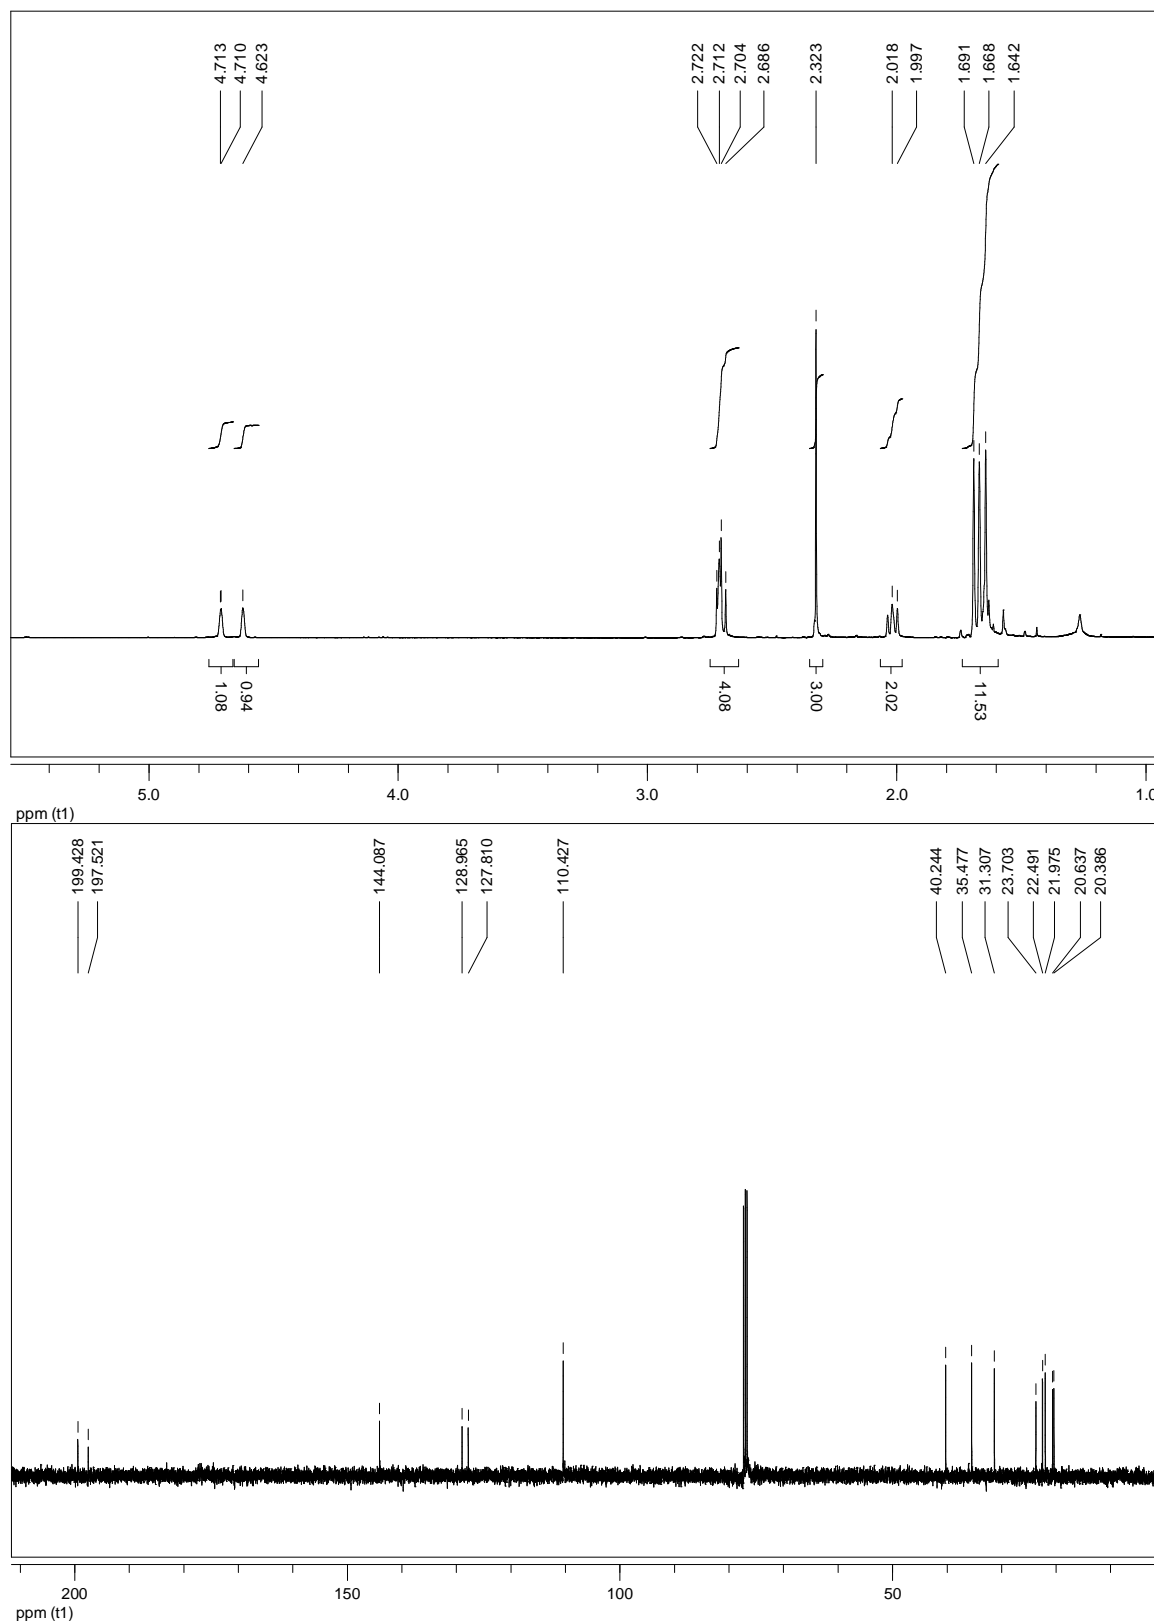

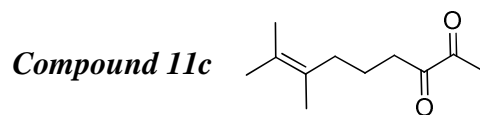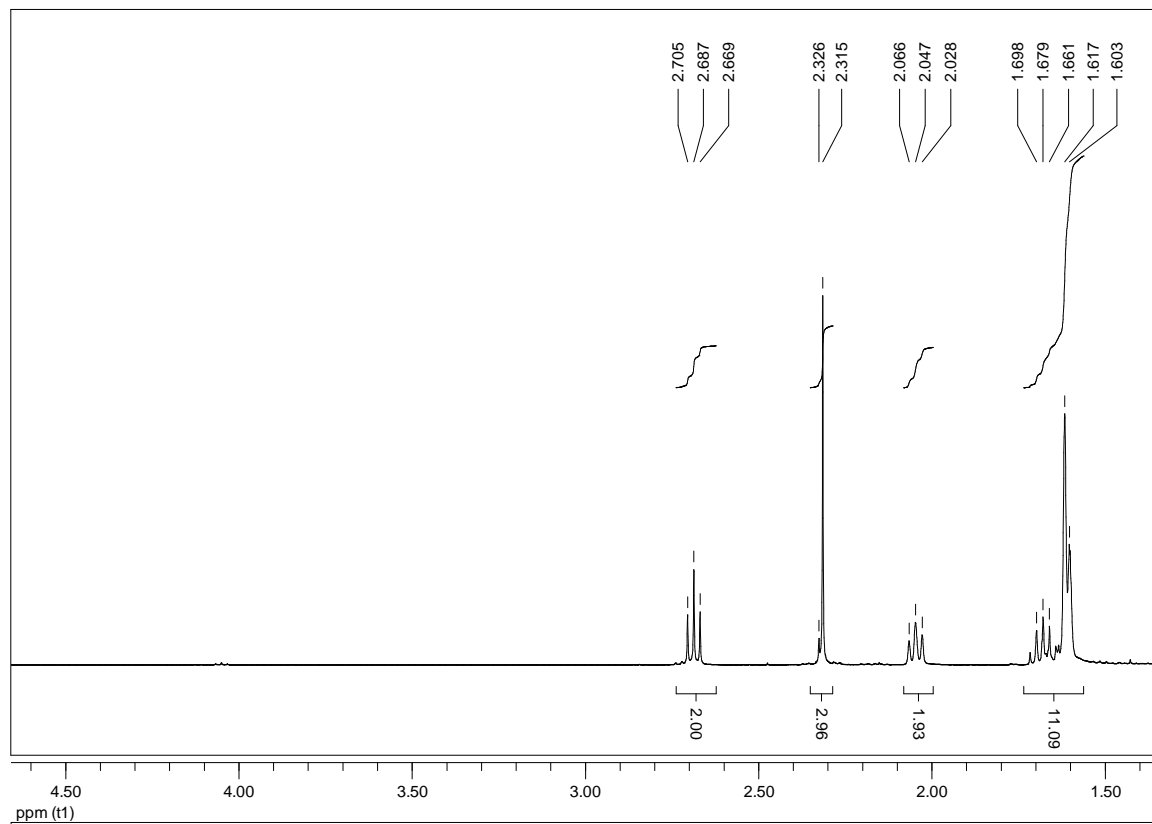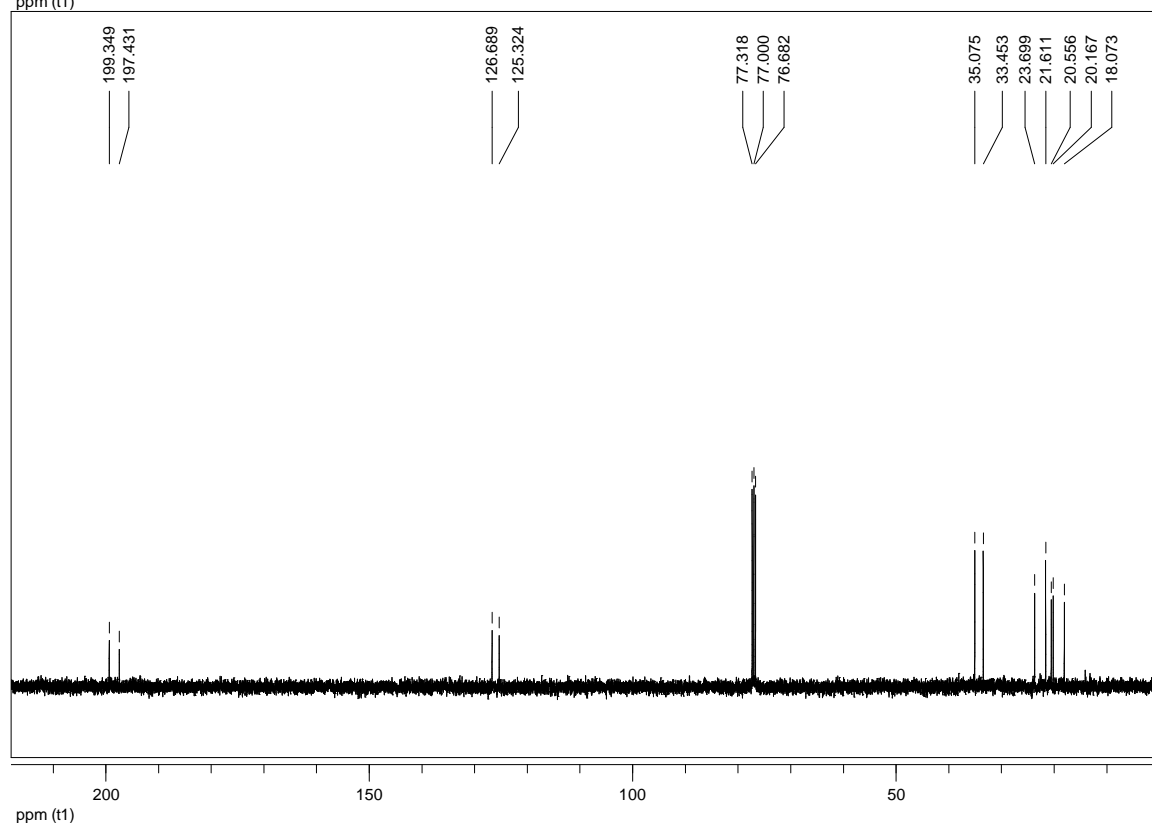

*Compound 11d*

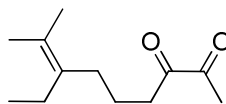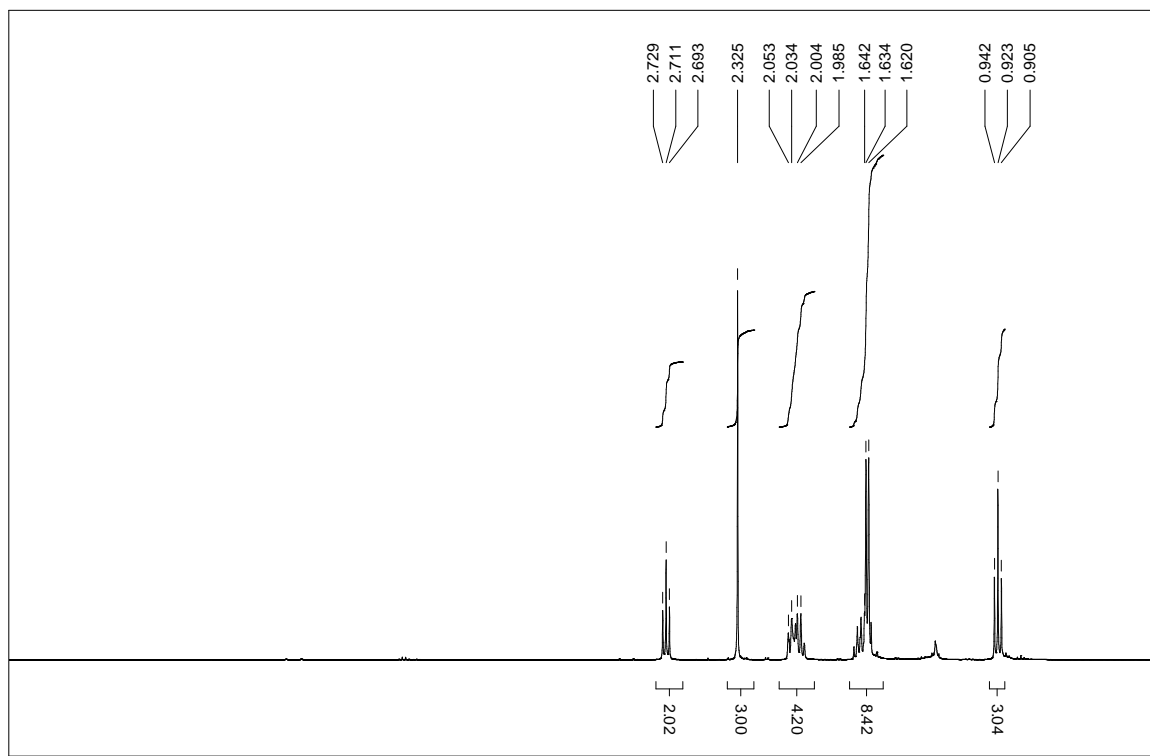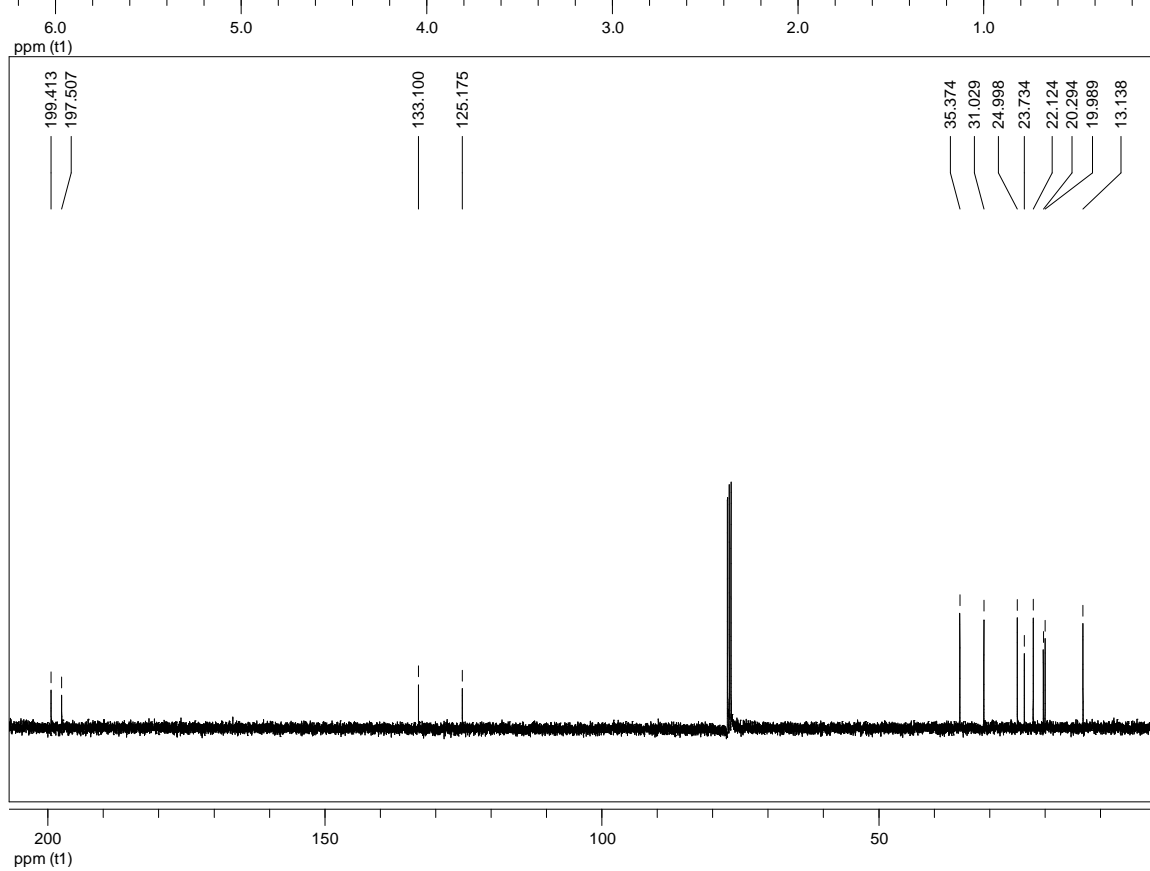

*Compound 11e*

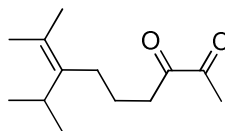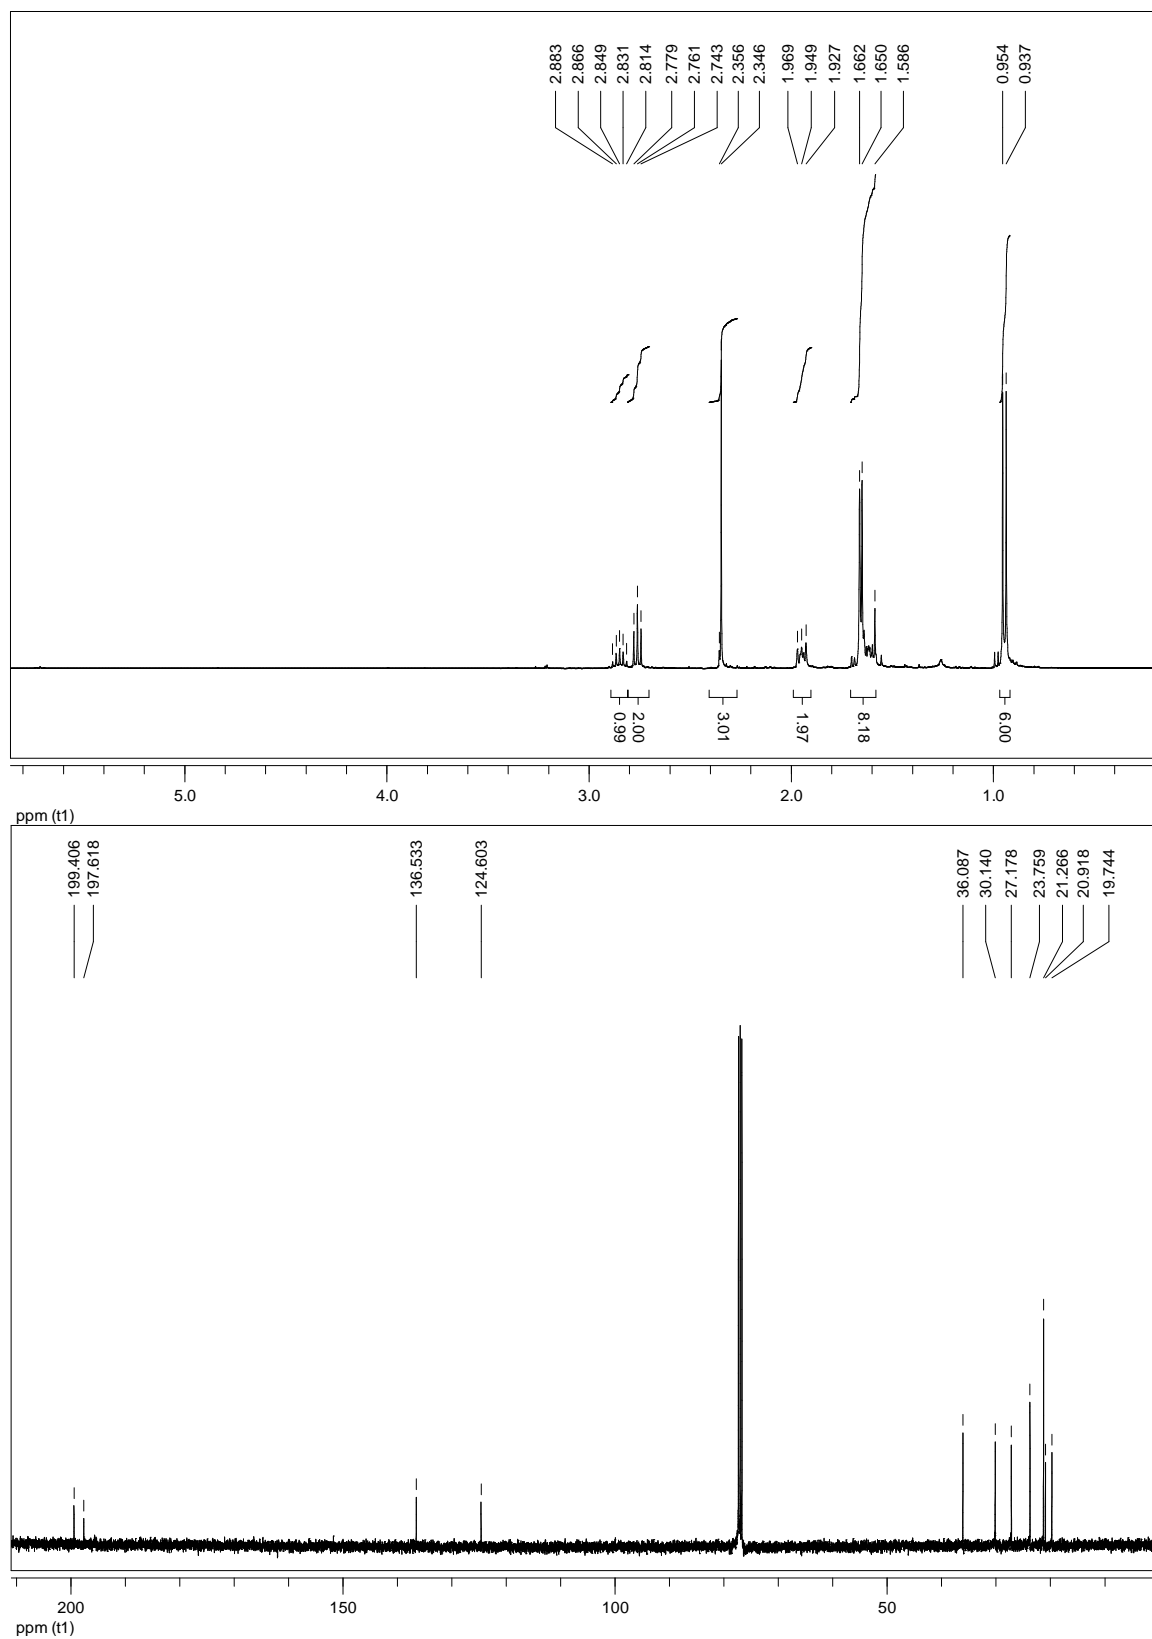

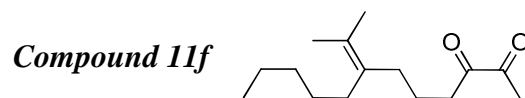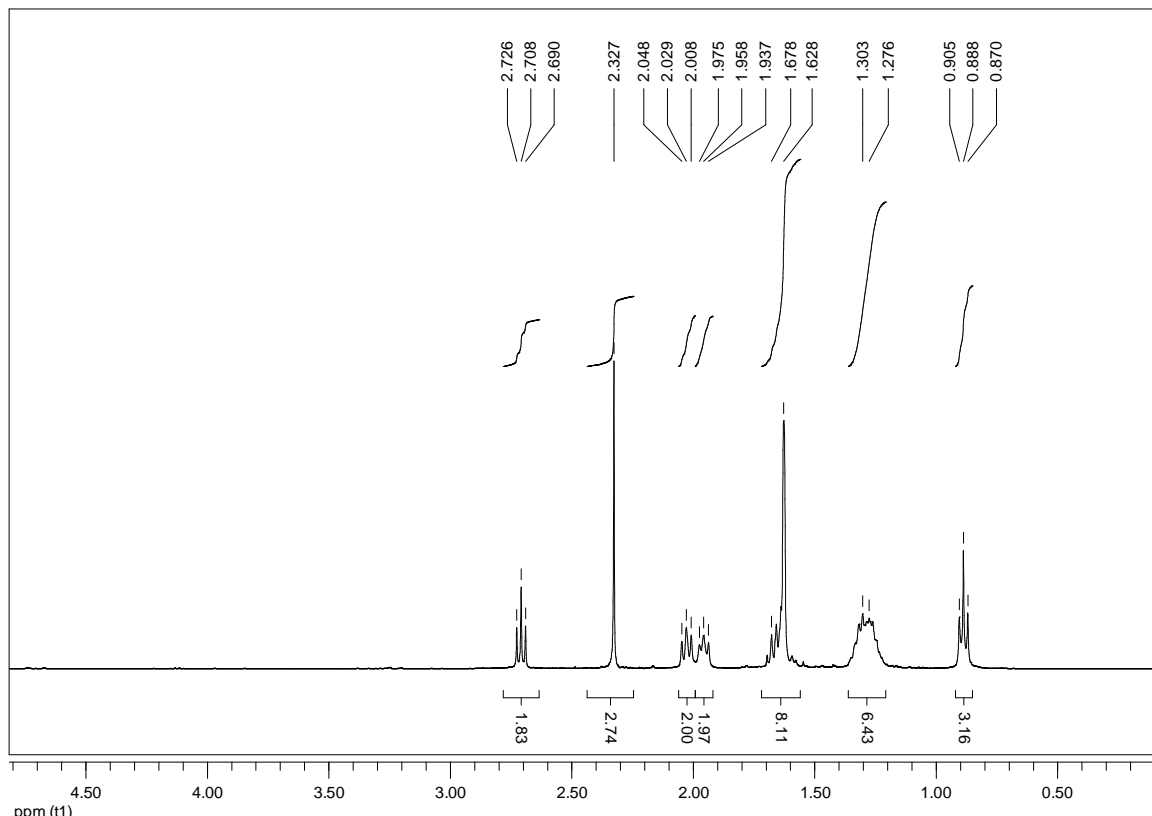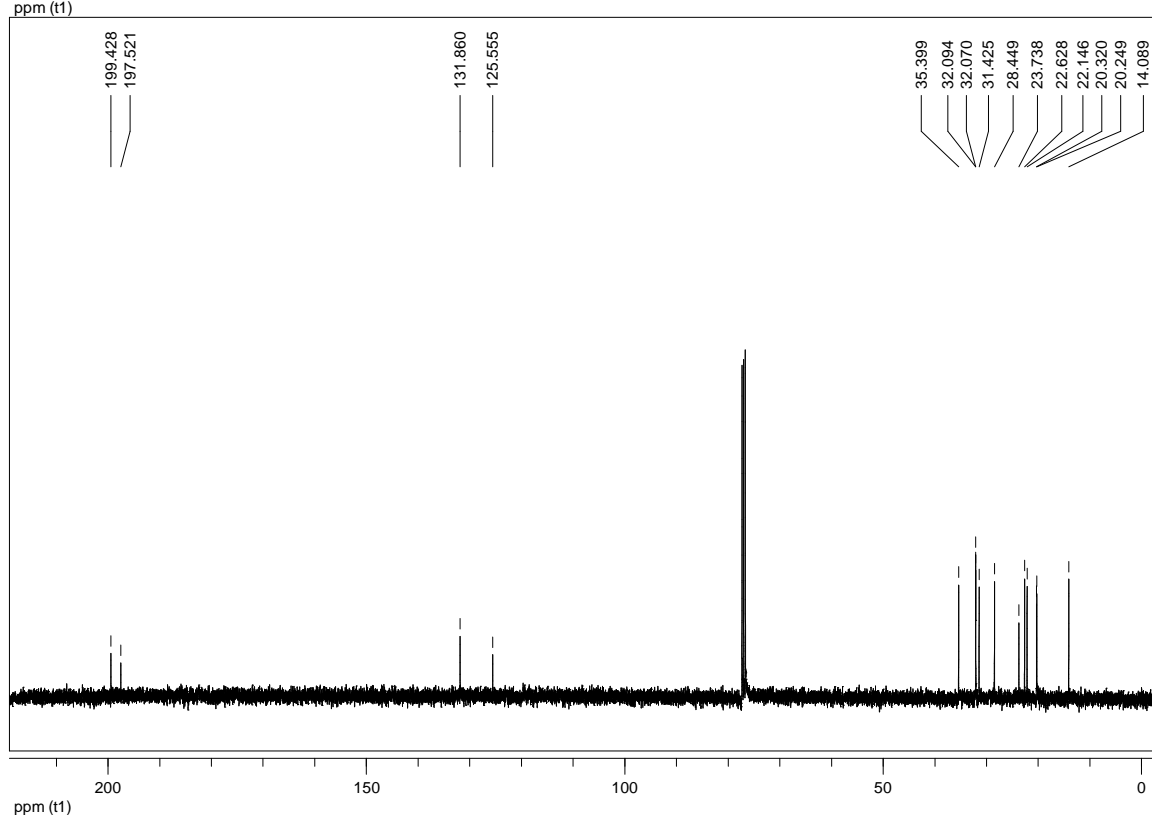



**Compound 11g**

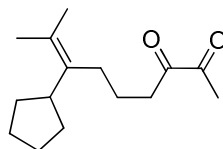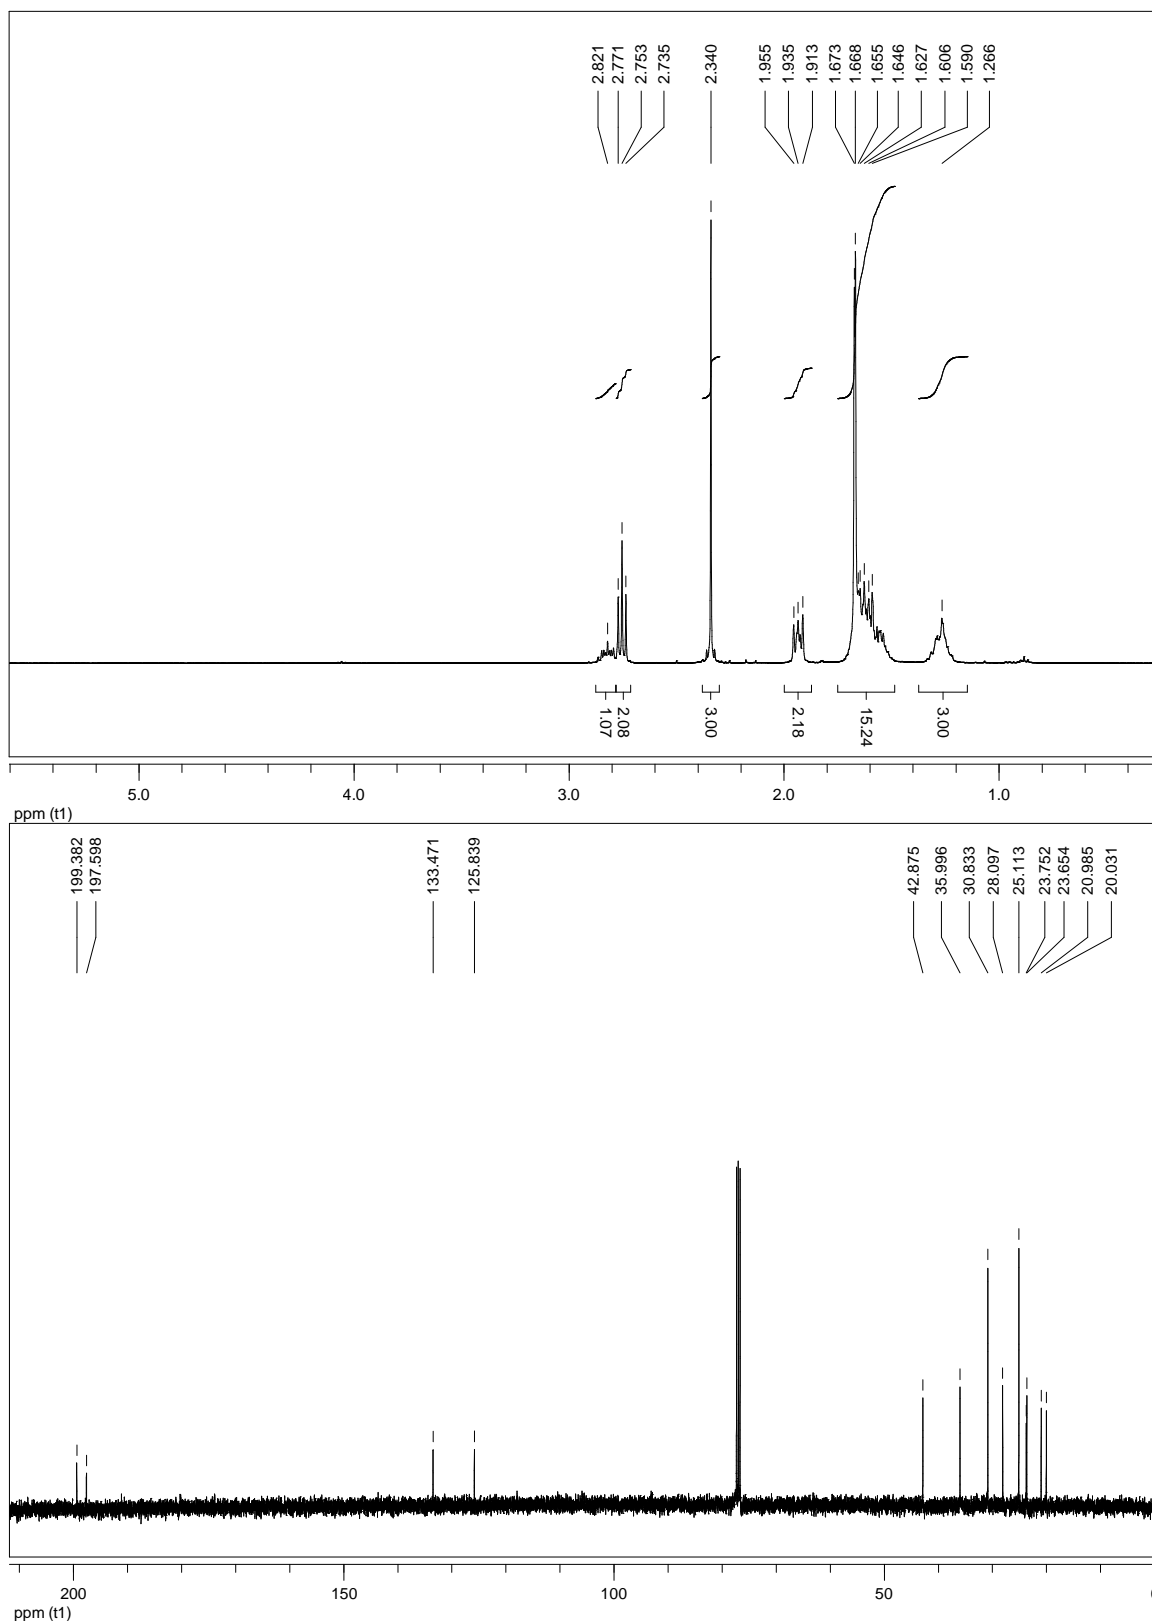

**Compound 17**

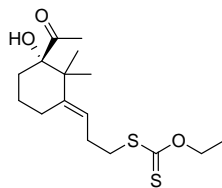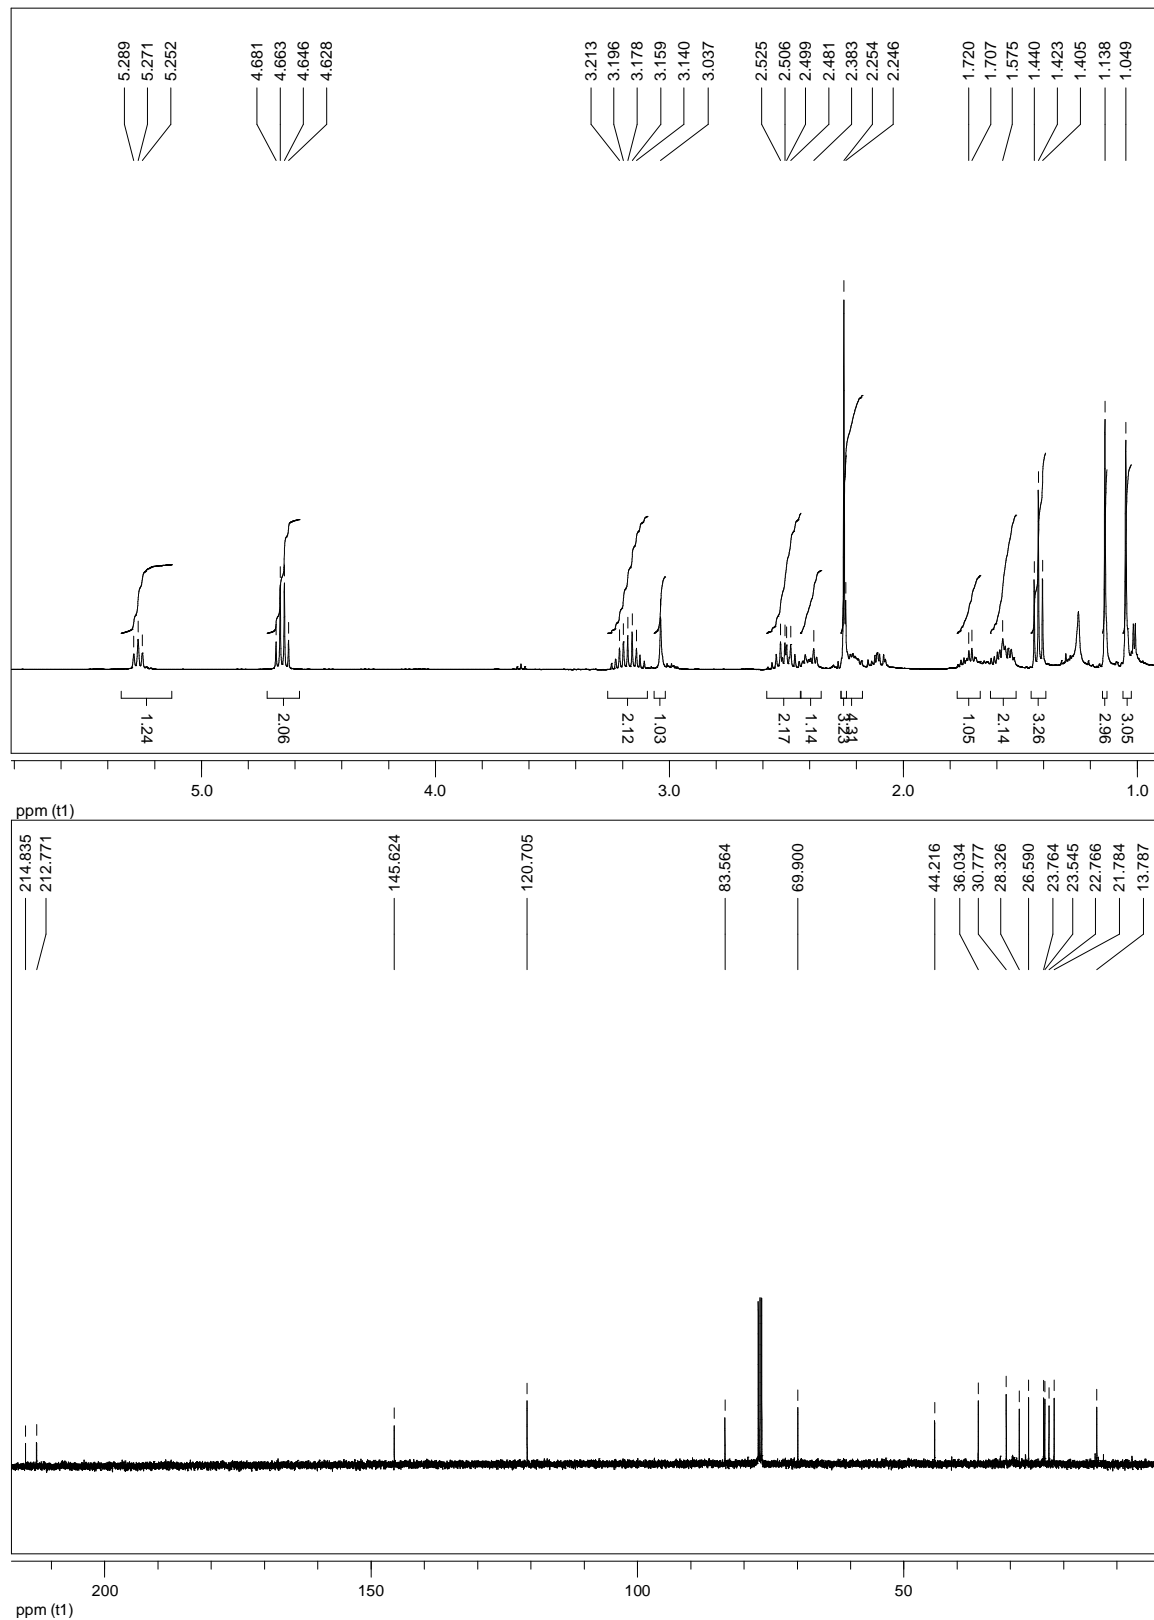

Supplement: c0cc04725b.pdf [file c0cc04725b.pdf]
